# Supplementary material for: Triggering the approach of an arene or heteroarene towards an aldehyde via Lewis acid–aldehyde communication
Source: Royal Society of Chemistry journal article supplement (doi:10.1039/c5ob02284c), 2016-01-01

**Electronic Supporting Information-ES1**

**Triggering the approach of an Arene or Heteroarene  
towards an aldehyde *via* Lewis acid-aldehyde  
communication**

Sanjay Pratihar \*

Department of chemical Sciences, Tezpur University, Napaam, Asaam-784028

**Table S1.** Difference in bond order of aldehyde after the coordination with SnCl<sub>4</sub>

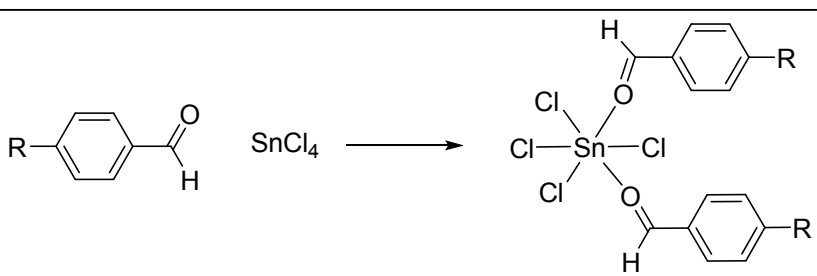

| Bond order          | CHO-Sn | CO<br>(free aldehyde) | CO<br>(complex) | $\Delta$ CO<br>(free-complex) | Sn-Cl (trans) | Sn-Cl (cis) |
|---------------------|--------|-----------------------|-----------------|-------------------------------|---------------|-------------|
| R = OMe             | 0.275  | 1.883                 | 1.569           | 0.314                         | 0.670         | 0.690       |
| R = Me              | 0.266  | 1.894                 | 1.595           | 0.299                         | 0.677         | 0.694       |
| R = H               | 0.260  | 1.900                 | 1.611           | 0.289                         | 0.681         | 0.698       |
| R = Cl              | 0.256  | 1.902                 | 1.612           | 0.290                         | 0.684         | 0.699       |
| R = CF <sub>3</sub> | 0.247  | 1.910                 | 1.633           | 0.277                         | 0.692         | 0.702       |
| R = CN              | 0.243  | 1.911                 | 1.638           | 0.273                         | 0.693         | 0.706       |

## S1.2 Spectral and Analytical Data

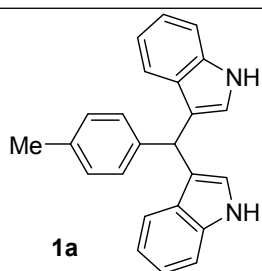

$\delta_{\text{H}}(\text{CDCl}_3)$  2.36 (3H, s), 5.87 (1H, s), 6.59 (2H, d,  $J = 2.0$  Hz), 6.99-7.34 (10H, m), 7.43 (2H, d,  $J = 7.8$  Hz), 7.78 (2H, s).  
 $\delta_{\text{C}}(\text{CDCl}_3)$  21.1, 39.8, 111.1, 119.2, 119.8, 120.0, 121.9, 123.6, 127.1, 128.6, 128.9, 135.5, 136.7, 141.1.

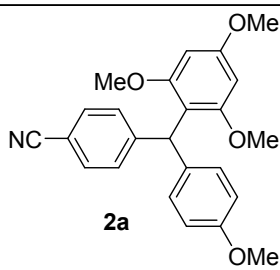

$\delta_{\text{H}}(\text{CDCl}_3)$  3.57 (3H, s), 3.75 (3H, s), 3.77 (3H, s), 5.96 (1H, s, CH), 6.11 (1H, s), 6.77 (2H, d,  $J = 8.8$  Hz), 7.07 (2H, d,  $J = 8.4$  Hz), 7.14 (2H, d,  $J = 8.0$  Hz), 7.44 (2H, d,  $J = 8.4$  Hz).  
 $\delta_{\text{C}}(\text{CDCl}_3)$  44.6, 55.2, 55.3, 55.5, 55.6, 91.5, 108.7, 112.4, 113.4, 119.5, 129.4, 130.2, 131.2, 134.1, 151.3, 157.9, 158.8, 160.4.

|                                                                                                      |                                                                                                                                                                                                                                                                                                                                                                                                                                                                                                                      |
|------------------------------------------------------------------------------------------------------|----------------------------------------------------------------------------------------------------------------------------------------------------------------------------------------------------------------------------------------------------------------------------------------------------------------------------------------------------------------------------------------------------------------------------------------------------------------------------------------------------------------------|
| 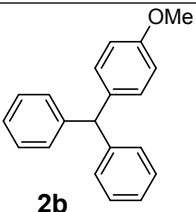 <p><b>2b</b></p>   | <p>HRMS (ESI) calcd for C<sub>24</sub>H<sub>23</sub>NO<sub>4</sub> [M+H]<sup>+</sup> = 390.1705, found 390.1699.</p> <p><math>\delta_{\text{H}}</math>(CDCl<sub>3</sub>) 3.79 (3H, s), 5.51 (1H, s, CH), 6.79-6.86 (2H, m), 7.0-7.33 (12H, m).</p> <p><math>\delta_{\text{C}}</math>(CDCl<sub>3</sub>) 55.2, 56.1, 113.7, 126.2, 128.3, 129.4, 130.4, 136.1, 144.3, 158.1.</p>                                                                                                                                       |
|  <p><b>2c</b></p>   | <p><math>\delta_{\text{H}}</math>(CDCl<sub>3</sub>) 2.33 (3H, s, CH<sub>3</sub>), 3.79 (6H, s, 2 OCH<sub>3</sub>), 5.43 (1H, s, CH), 6.80 (4H, d, <i>J</i> = 7.8 Hz, CH aromat.), 6.97-7.12 (8H, m, CH aromat.).</p> <p><math>\delta_{\text{C}}</math>(CDCl<sub>3</sub>) 20.9, 54.6, 55.2, 113.6, 128.9, 129.2, 130.2, 135.6, 136.7, 141.6, 157.9.</p>                                                                                                                                                               |
|  <p><b>2d</b></p>   | <p><math>\delta_{\text{H}}</math>(CDCl<sub>3</sub>) 3.78 (6H, s, 2 OCH<sub>3</sub>), 5.45 (1H, s, CH), 6.82 (4H, d, <i>J</i> = 8.7 Hz, CH aromat.), 7.02 (4H, d, <i>J</i> = 8.7 Hz, CH aromat.), 7.08-7.28 (5H, m, CH aromat.).</p> <p><math>\delta_{\text{C}}</math>(CDCl<sub>3</sub>) 48.8, 55.2, 113.7, 126.2, 128.3, 129.3, 130.3, 136.5, 144.6, 158.0.</p>                                                                                                                                                      |
|  <p><b>2e</b></p> | <p><math>\delta_{\text{H}}</math>(CDCl<sub>3</sub>) 3.79 (6H, s, 2 OCH<sub>3</sub>), 5.42 (1H, s, CH), 6.82 (4H, d, <i>J</i> = 8.7 Hz, CH aromat.), 6.99 (4H, d, <i>J</i> = 8.7 Hz, CH aromat.), 7.03 (2H, d, <i>J</i> = 8.5 Hz, CH aromat.), 7.24 (2H, d, <i>J</i> = 8.5 Hz, CH aromat.).</p> <p><math>\delta_{\text{C}}</math>(CDCl<sub>3</sub>) 54.5, 55.2, 113.7, 128.3, 130.2, 130.6, 131.9, 135.9, 143.2, 158.1.</p>                                                                                           |
|  <p><b>2f</b></p> | <p><math>\delta_{\text{H}}</math>(CDCl<sub>3</sub>) 3.79 (3H, s), 5.49 (1H, s, CH), 6.84 (4H, d, <i>J</i> = 8.6 Hz, CH aromat.), 6.99 (4H, d, <i>J</i> = 8.8 Hz, CH aromat.), 7.23 (2H, d, <i>J</i> = 8.2 Hz, CH aromat.), 7.56 (2H, d, <i>J</i> = 8.2 Hz, CH aromat.).</p> <p><math>\delta_{\text{C}}</math>(CDCl<sub>3</sub>) 53.3, 110.1, 114.0, 119.0, 130.1, 130.2, 132.1, 134.9, 150.3, 158.4</p> <p>Anal. (C<sub>22</sub>H<sub>19</sub>NO<sub>2</sub>) calcd, C: 80.22; H: 5.81 found, C: 79.98, H: 5.65.</p> |
|  <p><b>2g</b></p> | <p><math>\delta_{\text{H}}</math>(CDCl<sub>3</sub>) 1.24 (3H, t, <i>J</i> = 7.2 Hz), 3.77 (3H, s), 4.22 (2H, q, <i>J</i> = 4.0 Hz), 4.90 (1H, s), 6.84 (4H, d, <i>J</i> = 8.8 Hz), 7.25 (4H, d, <i>J</i> = 8.8 Hz).</p> <p><math>\delta_{\text{C}}</math>(CDCl<sub>3</sub>) 14.2, 55.2, 55.5, 61.1, 113.9, 129.5, 131.3, 158.7, 173.0. Anal. (C<sub>20</sub>H<sub>18</sub>O<sub>4</sub>) calcd, C: 71.98; H: 6.71</p>                                                                                                |

found, C: 71.72, H: 6.62.

**Table S4.** Bond order of six *para* substituted benzaldehyde.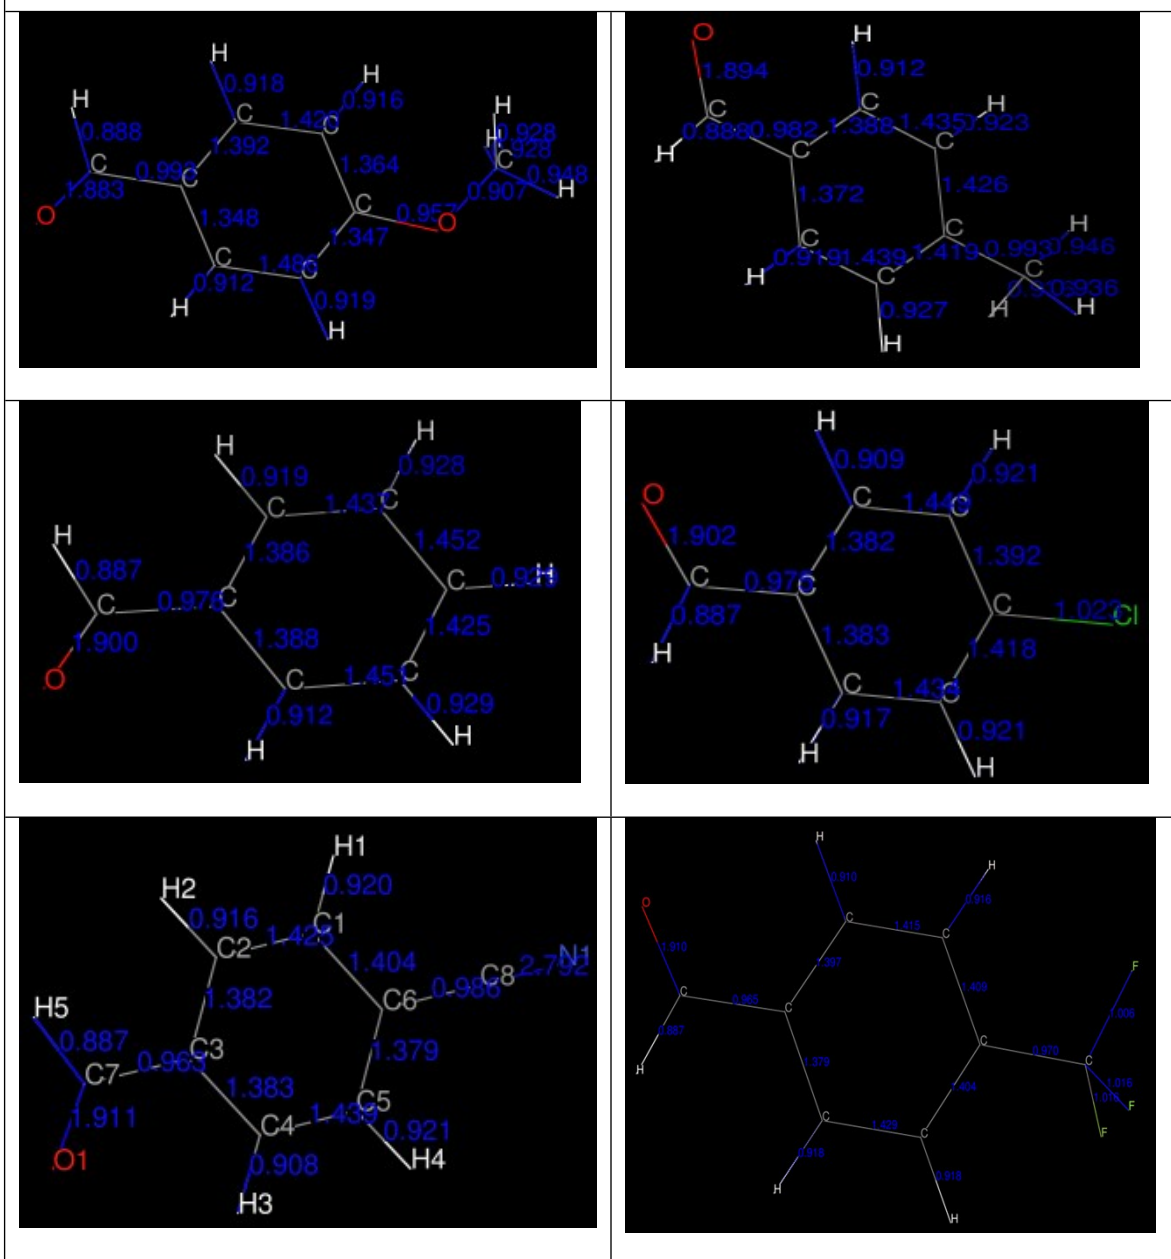





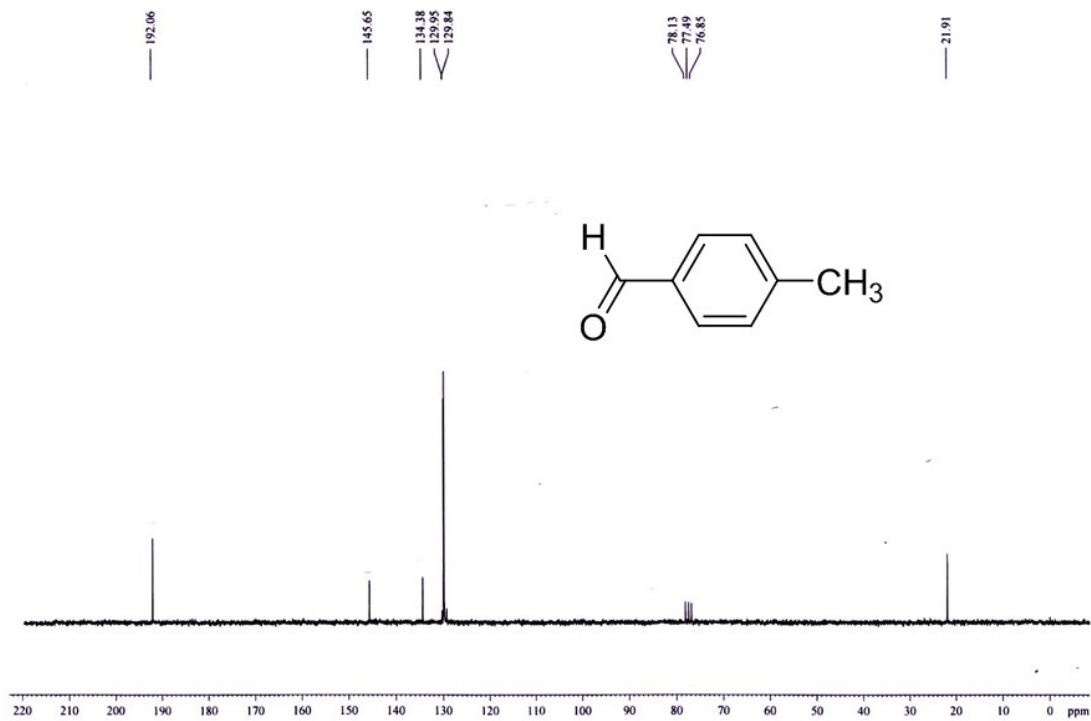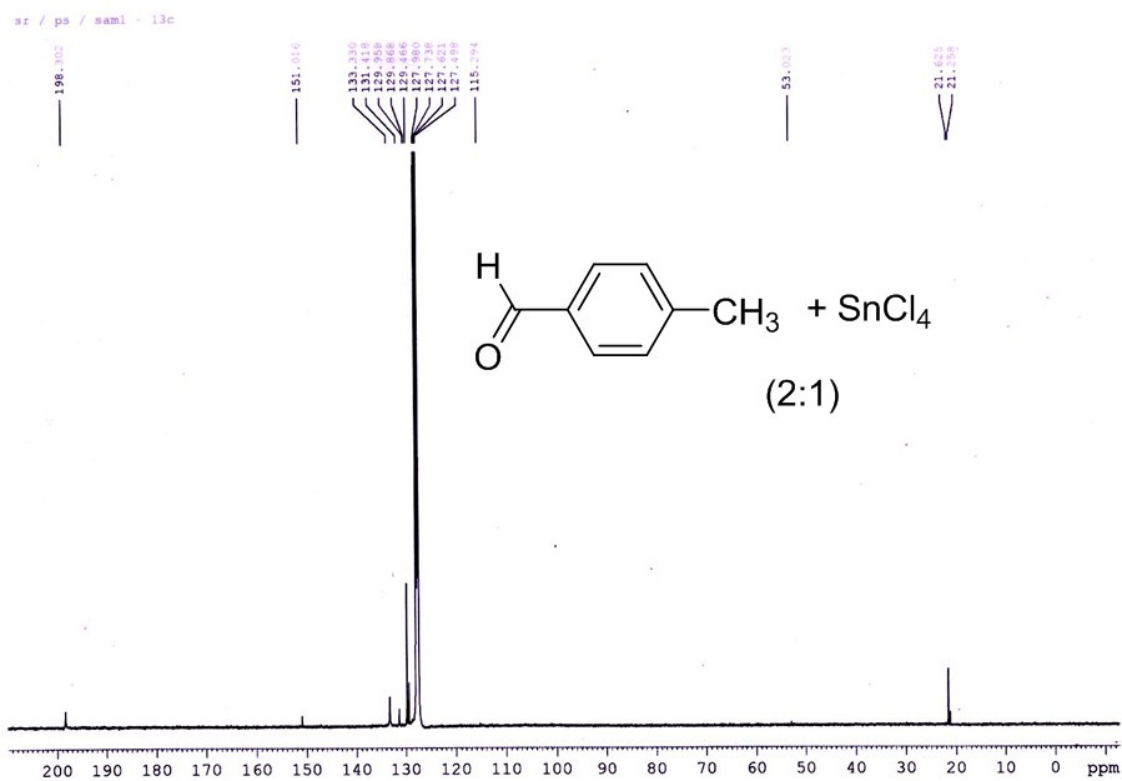

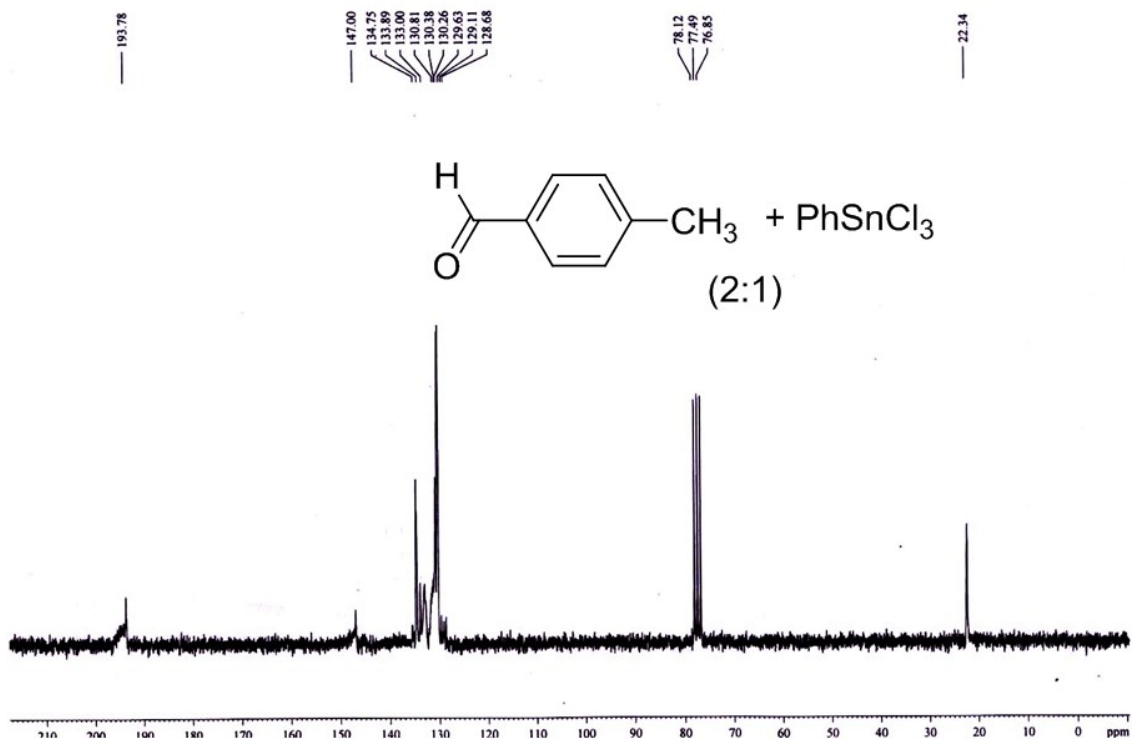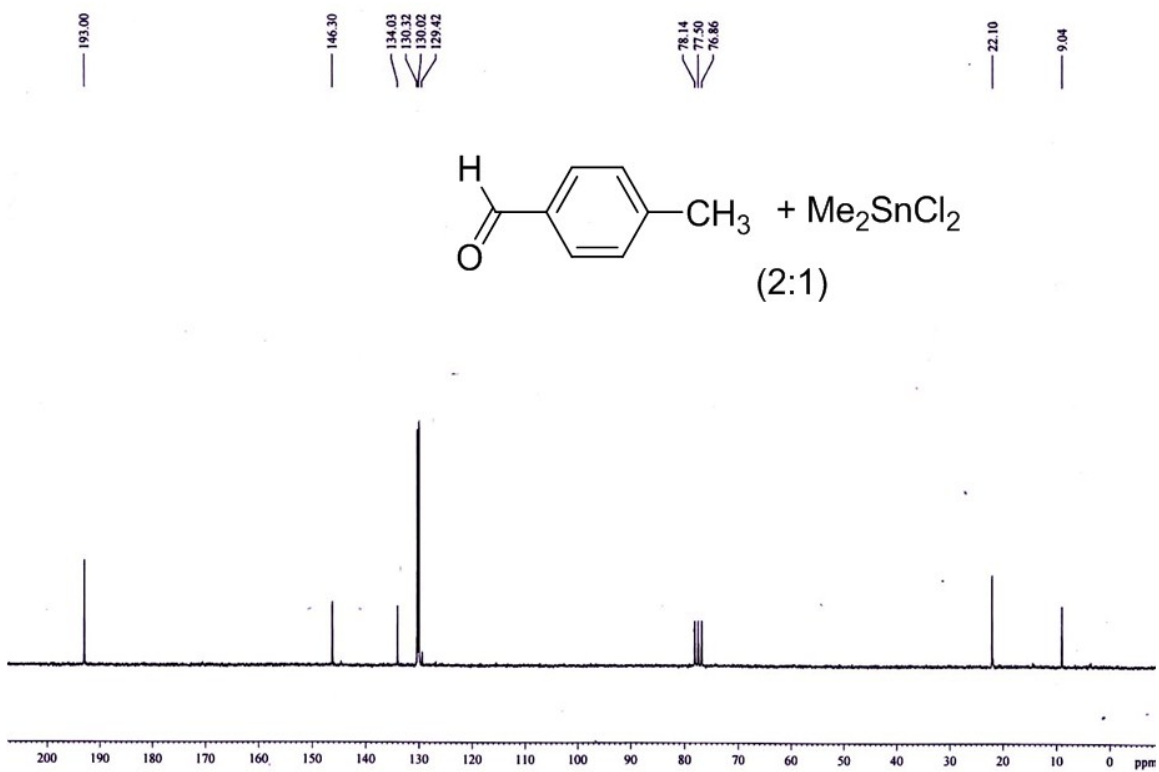



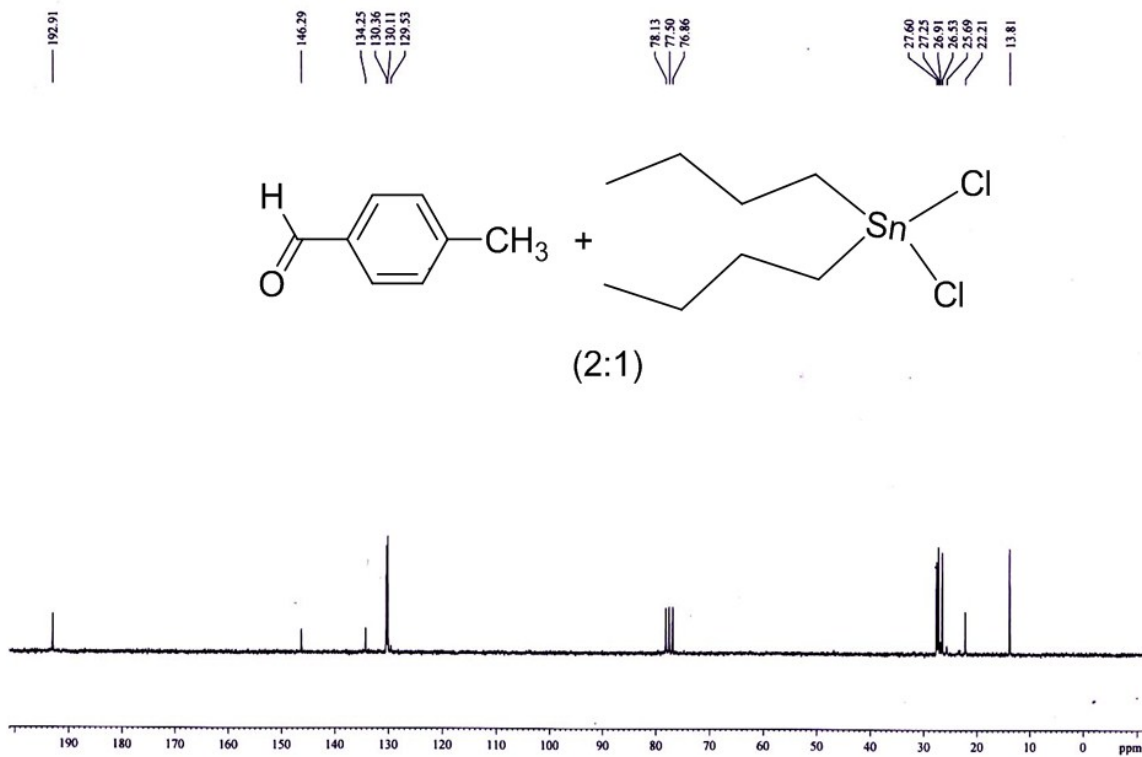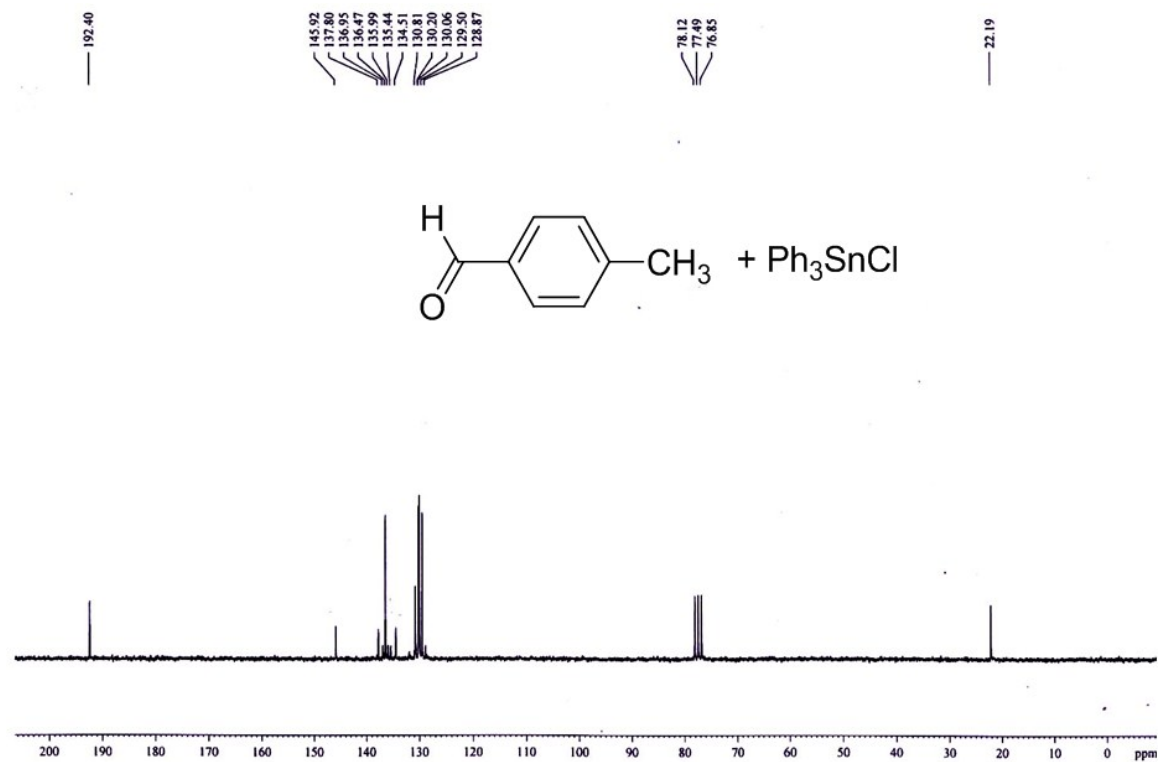

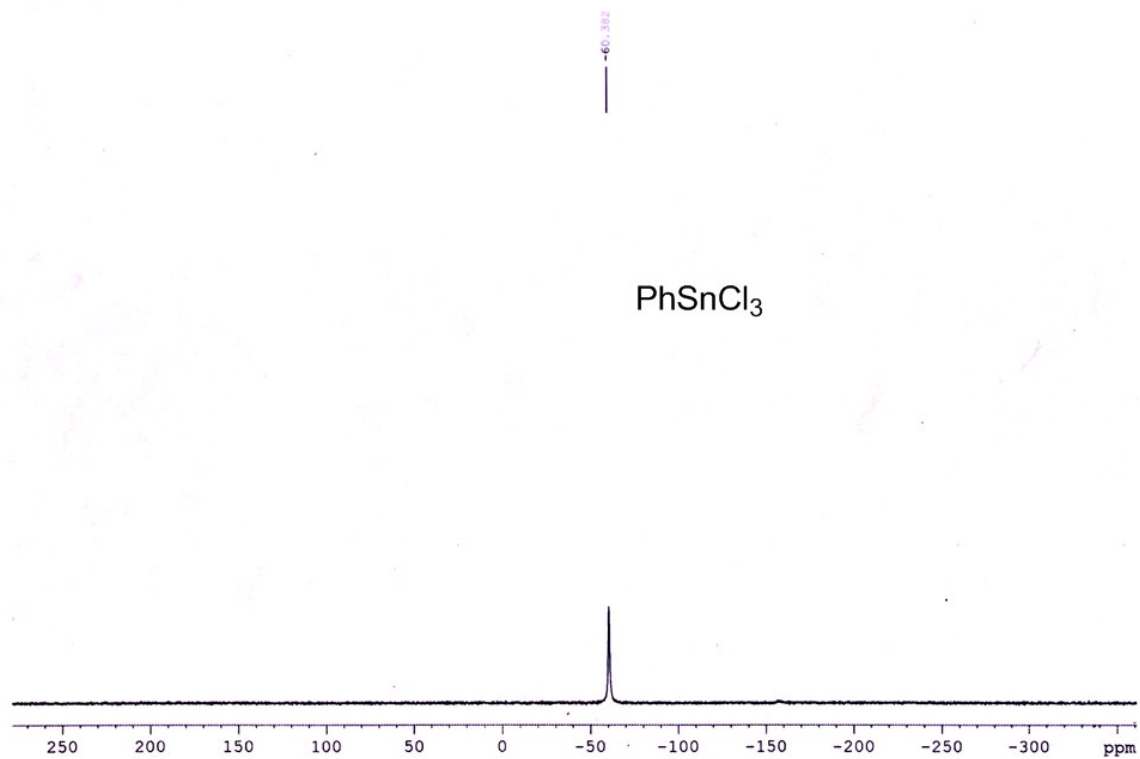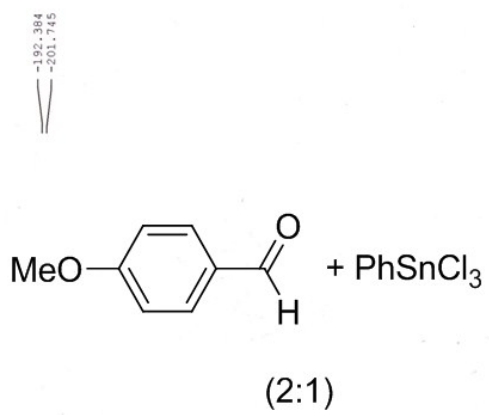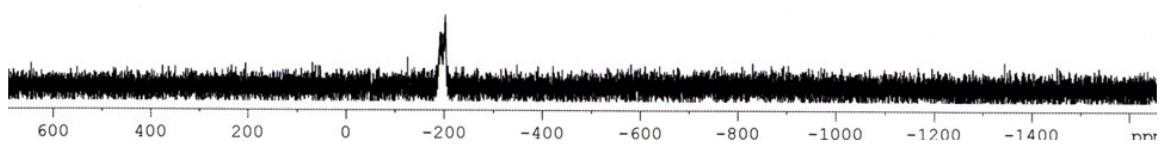

-188.188  
-192.097

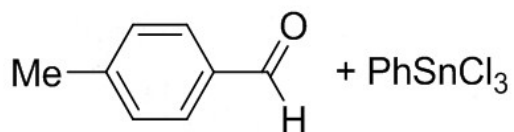

(2:1)

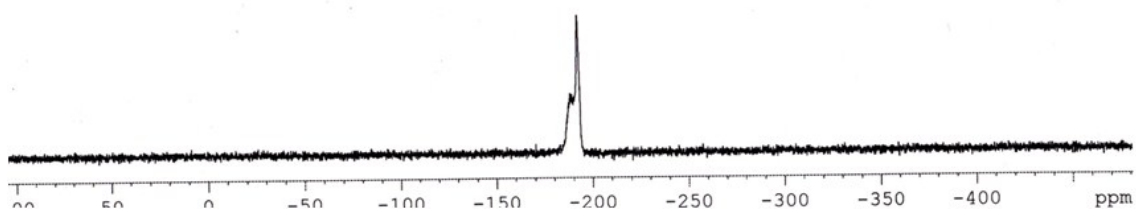

-131.960

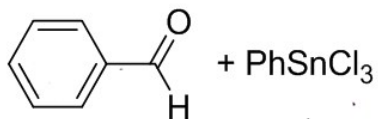

(2:1)

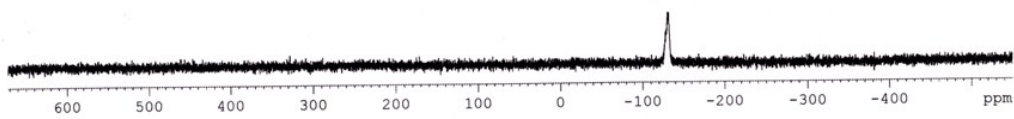

-99.498

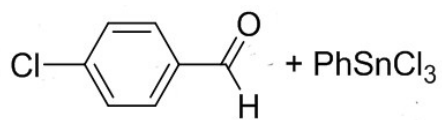

(2:1)

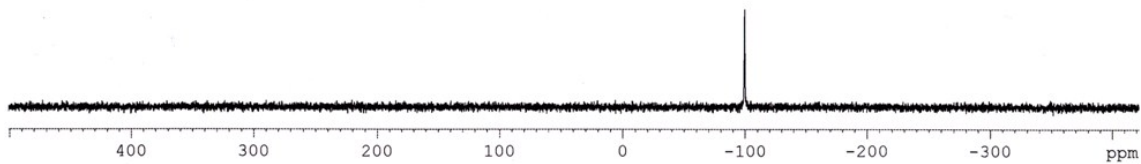

-84.471

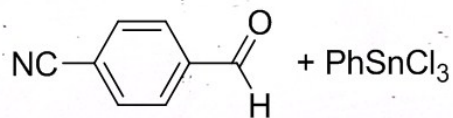

(2:1)

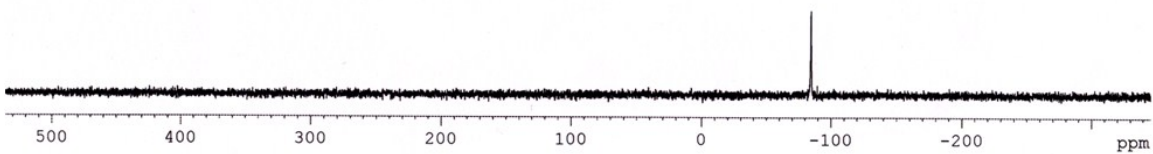

-85.939

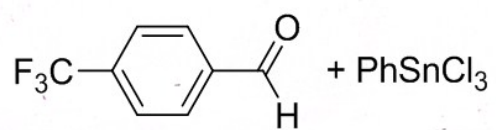

(2:1)

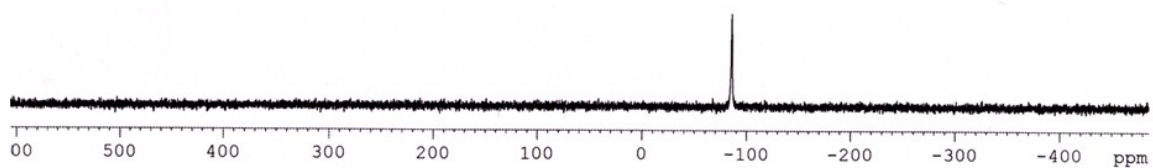

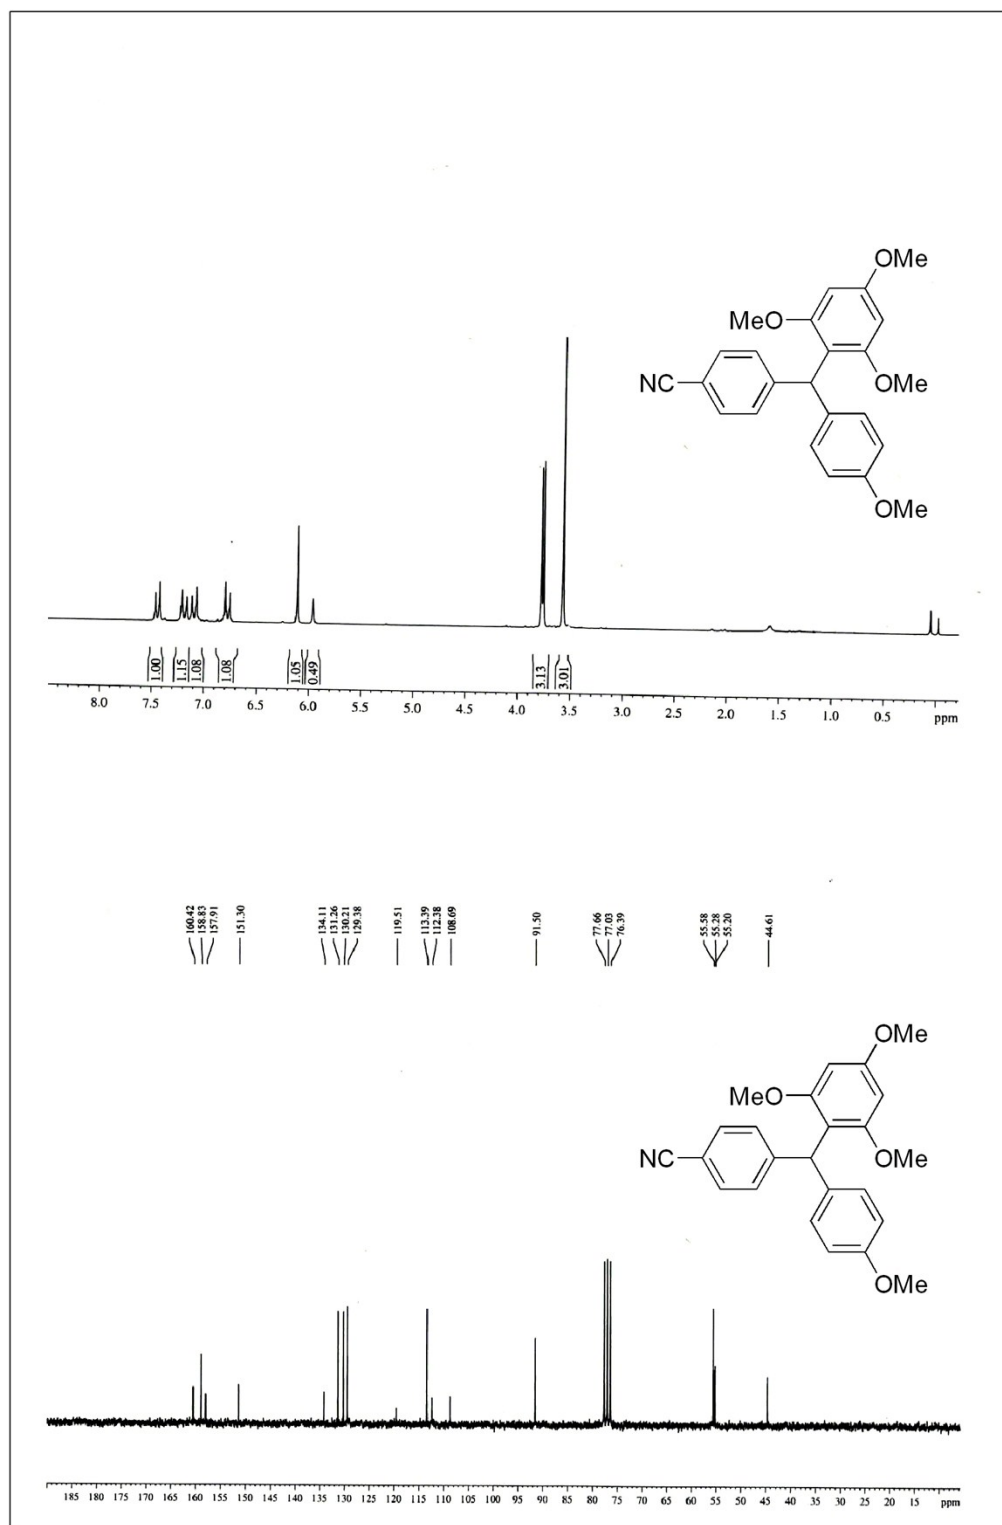

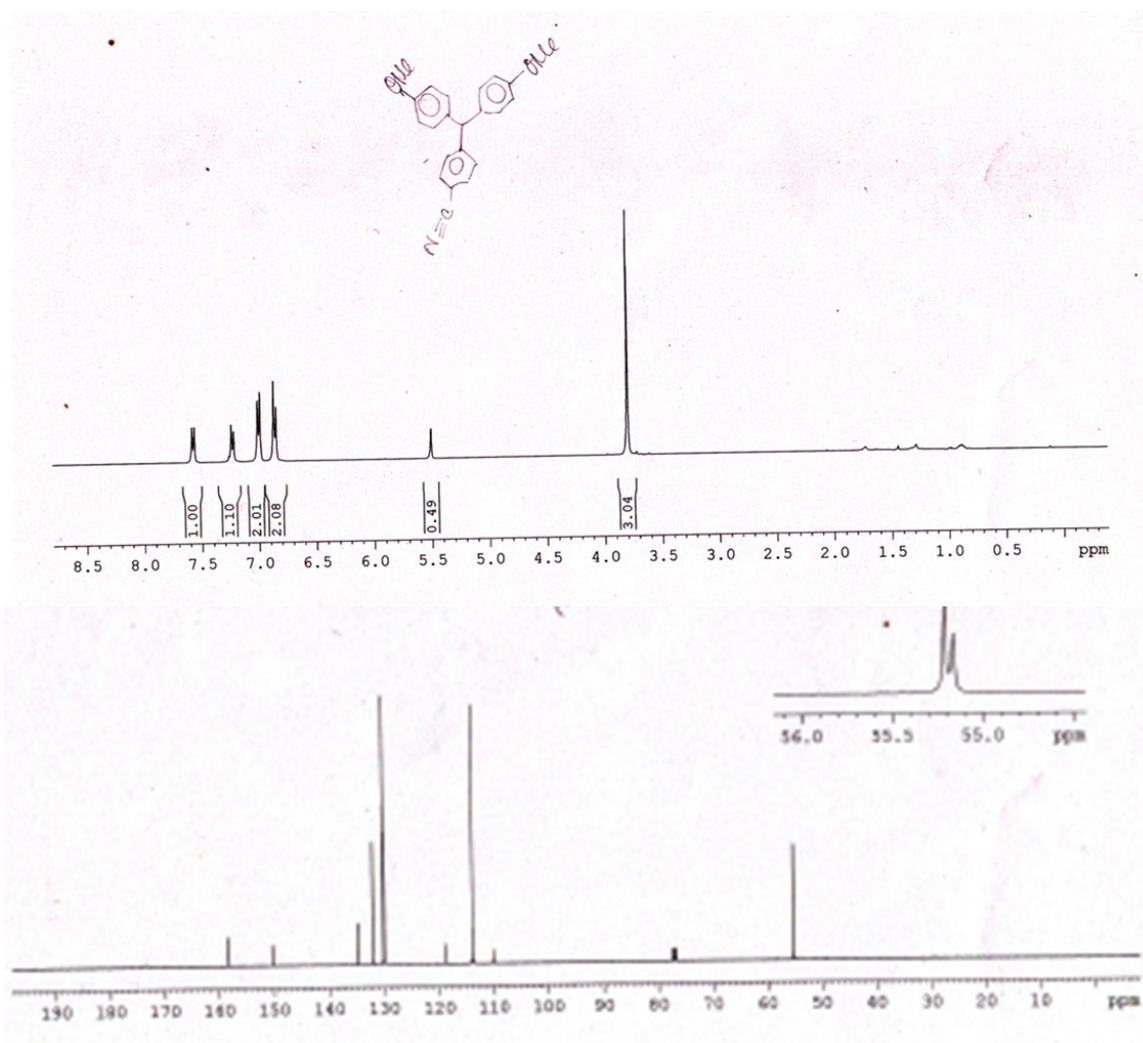

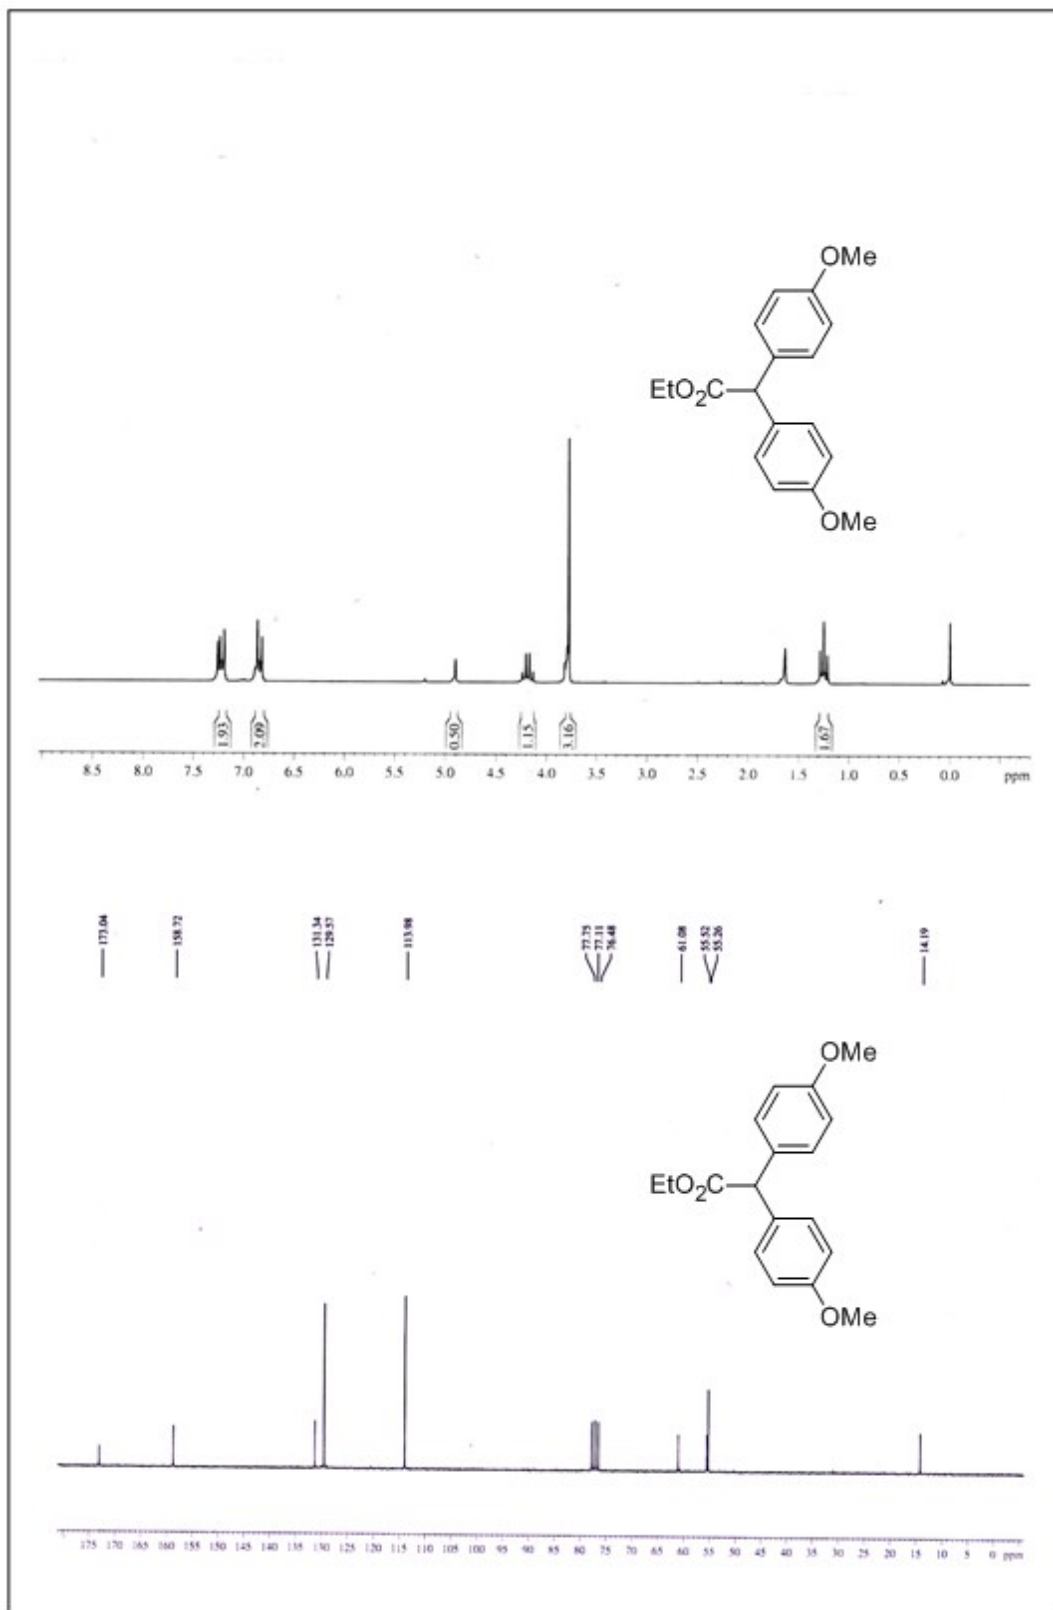

Supplement: c5ob02284c1.pdf [file c5ob02284c1.pdf]
