# Supplementary material for: Triggering the approach of an arene or heteroarene towards an aldehyde via Lewis acid–aldehyde communication
Source: Royal Society of Chemistry journal article supplement (doi:10.1039/c5ob02284c), 2016-01-01
Supplement: c5ob02284c2.pdf [file c5ob02284c2.pdf]

**Electronic Supporting Information (SI-2)**

**Triggering the approach of an Arene or Heteroarene  
towards an aldehyde *via* Lewis acid-aldehyde  
communication**

Sanjay Pratihar \*

*Department of Chemical Sciences, Tezpur University, Napaam, 784028, Asam, India*

[spratihar29@gmail.com](mailto:spratihar29@gmail.com), [spratihar@tezu.ernet.in](mailto:spratihar@tezu.ernet.in)

ESI

**The Cartesian coordinates of the optimized geometries, Frequency data,  
and NImag Obtained at the B3LYP/LANL2DZ/6-31G\* Level of Theory**

**Optimized Geometry:****Benzaldehyde**

Cartesian Coordinates (Angstroms):

|    |   |   |           |           |          |
|----|---|---|-----------|-----------|----------|
| 1  | 6 | 0 | 1.630463  | -1.216505 | 0.000000 |
| 2  | 6 | 0 | 1.333296  | 0.145726  | 0.000000 |
| 3  | 6 | 0 | 0.000000  | 0.575158  | 0.000000 |
| 4  | 6 | 0 | -1.039163 | -0.368134 | 0.000000 |
| 5  | 6 | 0 | -0.741952 | -1.726711 | 0.000000 |
| 6  | 6 | 0 | 0.592410  | -2.150981 | 0.000000 |
| 7  | 6 | 0 | -0.306260 | 2.023585  | 0.000000 |
| 8  | 8 | 0 | -1.426688 | 2.496533  | 0.000000 |
| 9  | 1 | 0 | 2.664468  | -1.549839 | 0.000000 |
| 10 | 1 | 0 | 2.133761  | 0.882881  | 0.000000 |
| 11 | 1 | 0 | -2.064300 | -0.010306 | 0.000000 |
| 12 | 1 | 0 | -1.544001 | -2.459708 | 0.000000 |
| 13 | 1 | 0 | 0.821614  | -3.213387 | 0.000000 |
| 14 | 1 | 0 | 0.589205  | 2.685269  | 0.000000 |

**Frequency Data:**

Temperature 298.150 Kelvin. Pressure 1.00000 Atm.  
 Zero-point correction= 0.110226 (Hartree/Particle)  
 Thermal correction to Energy= 0.116512  
 Thermal correction to Enthalpy= 0.117456  
 Thermal correction to Gibbs Free Energy= 0.079711  
 Sum of electronic and zero-point Energies= -345.463229  
 Sum of electronic and thermal Energies= -345.456944  
 Sum of electronic and thermal Enthalpies= -345.455999  
 Sum of electronic and thermal Free Energies= -345.493744

**C-1**

Cartesian Coordinates (Angstroms):

|    |    |   |           |           |           |
|----|----|---|-----------|-----------|-----------|
| 1  | 6  | 0 | 3.964674  | -1.278538 | -0.011807 |
| 2  | 6  | 0 | 5.331487  | -1.018117 | -0.006424 |
| 3  | 6  | 0 | 5.782392  | 0.305463  | 0.005271  |
| 4  | 6  | 0 | 4.874106  | 1.373297  | 0.011531  |
| 5  | 6  | 0 | 3.508914  | 1.121525  | 0.006106  |
| 6  | 6  | 0 | 3.048434  | -0.210524 | -0.005517 |
| 7  | 1  | 0 | 3.598928  | -2.302294 | -0.020935 |
| 8  | 1  | 0 | 6.043412  | -1.837555 | -0.011274 |
| 9  | 1  | 0 | 5.238652  | 2.395899  | 0.020588  |
| 10 | 1  | 0 | 2.784884  | 1.929775  | 0.010611  |
| 11 | 6  | 0 | 1.630243  | -0.507059 | -0.011389 |
| 12 | 8  | 0 | 0.753801  | 0.373744  | -0.007221 |
| 13 | 1  | 0 | 1.337408  | -1.566711 | -0.021129 |
| 14 | 50 | 0 | -1.508400 | 0.038606  | 0.000382  |
| 15 | 17 | 0 | -1.030205 | -1.049514 | 2.029911  |
| 16 | 17 | 0 | -3.848466 | -0.263189 | 0.012586  |

|    |    |   |           |           |           |
|----|----|---|-----------|-----------|-----------|
| 17 | 17 | 0 | -1.460462 | 2.369998  | -0.104963 |
| 18 | 17 | 0 | -1.031742 | -1.219916 | -1.930202 |
| 19 | 1  | 0 | 6.849674  | 0.508874  | 0.009532  |

**Frequency Data:**

Temperature 298.150 Kelvin. Pressure 1.00000 Atm.  
 Zero-point correction= 0.116875 (Hartree/Particle)  
 Thermal correction to Energy= 0.132553  
 Thermal correction to Enthalpy= 0.133497  
 Thermal correction to Gibbs Free Energy= 0.068890  
 Sum of electronic and zero-point Energies= -2189.776131  
 Sum of electronic and thermal Energies= -2189.760453  
 Sum of electronic and thermal Enthalpies= -2189.759509  
 Sum of electronic and thermal Free Energies= -2189.824116

**C-2**

Cartesian Coordinates (Angstroms):

|    |    |   |           |           |           |
|----|----|---|-----------|-----------|-----------|
| 1  | 6  | 0 | -4.895057 | 1.163797  | -0.005182 |
| 2  | 6  | 0 | -6.259800 | 1.418050  | -0.004509 |
| 3  | 6  | 0 | -7.170129 | 0.351957  | -0.003199 |
| 4  | 6  | 0 | -6.722242 | -0.972665 | -0.002226 |
| 5  | 6  | 0 | -5.356070 | -1.236031 | -0.002201 |
| 6  | 6  | 0 | -4.437828 | -0.169480 | -0.003882 |
| 7  | 1  | 0 | -4.169248 | 1.970388  | -0.006145 |
| 8  | 1  | 0 | -6.622375 | 2.441415  | -0.004958 |
| 9  | 1  | 0 | -7.435898 | -1.790672 | -0.001351 |
| 10 | 1  | 0 | -4.990911 | -2.259852 | -0.001297 |
| 11 | 6  | 0 | -3.023378 | -0.473875 | -0.004005 |
| 12 | 1  | 0 | -8.237077 | 0.557662  | -0.002838 |
| 13 | 50 | 0 | -0.000002 | 0.000090  | 0.001327  |
| 14 | 8  | 0 | 2.146239  | -0.413138 | 0.011936  |
| 15 | 6  | 0 | 3.023390  | 0.473787  | 0.002982  |
| 16 | 6  | 0 | 4.437826  | 0.169310  | 0.001552  |
| 17 | 6  | 0 | 4.894999  | -1.163987 | 0.003940  |
| 18 | 6  | 0 | 5.356123  | 1.235811  | -0.002480 |
| 19 | 6  | 0 | 6.259726  | -1.418307 | 0.001998  |
| 20 | 1  | 0 | 4.169151  | -1.970540 | 0.006670  |
| 21 | 6  | 0 | 6.722279  | 0.972382  | -0.003664 |
| 22 | 1  | 0 | 4.991010  | 2.259648  | -0.004239 |
| 23 | 6  | 0 | 7.170105  | -0.352261 | -0.001611 |
| 24 | 1  | 0 | 6.622254  | -2.441688 | 0.003231  |
| 25 | 1  | 0 | 7.435972  | 1.790352  | -0.006334 |
| 26 | 1  | 0 | 8.237041  | -0.558020 | -0.002947 |
| 27 | 1  | 0 | 2.723050  | 1.529162  | -0.002542 |
| 28 | 17 | 0 | -0.310045 | -1.606185 | 1.775261  |
| 29 | 17 | 0 | -0.314640 | -1.756171 | -1.625696 |
| 30 | 17 | 0 | 0.316116  | 1.756230  | 1.627971  |
| 31 | 17 | 0 | 0.308609  | 1.606490  | -1.772951 |
| 32 | 8  | 0 | -2.146271 | 0.413109  | -0.010292 |

33 1 0 -2.722932 -1.529227 0.000236

**Frequency Data:**

Temperature 298.150 Kelvin. Pressure 1.00000 Atm.  
 Zero-point correction= 0.229342 (Hartree/Particle)  
 Thermal correction to Energy= 0.252866  
 Thermal correction to Enthalpy= 0.253810  
 Thermal correction to Gibbs Free Energy= 0.170082  
 Sum of electronic and zero-point Energies= -2535.247731  
 Sum of electronic and thermal Energies= -2535.224207  
 Sum of electronic and thermal Enthalpies= -2535.223263  
 Sum of electronic and thermal Free Energies= -2535.306991

**C-3**

Cartesian Coordinates (Angstroms):

|    |    |   |           |           |           |
|----|----|---|-----------|-----------|-----------|
| 1  | 6  | 0 | 5.000700  | -1.810398 | -0.000294 |
| 2  | 6  | 0 | 6.391900  | -1.824998 | -0.000594 |
| 3  | 6  | 0 | 4.313500  | -0.582098 | -0.000294 |
| 4  | 1  | 0 | 4.438400  | -2.740598 | -0.000094 |
| 5  | 6  | 0 | 7.095100  | -0.616398 | -0.000794 |
| 6  | 1  | 0 | 6.928000  | -2.768898 | -0.000594 |
| 7  | 6  | 0 | 6.415800  | 0.609902  | -0.000794 |
| 8  | 1  | 0 | 8.181700  | -0.627598 | -0.000994 |
| 9  | 6  | 0 | 5.027800  | 0.633102  | -0.000494 |
| 10 | 1  | 0 | 6.975300  | 1.540302  | -0.000994 |
| 11 | 1  | 0 | 4.477800  | 1.568502  | -0.000494 |
| 12 | 6  | 0 | 2.866900  | -0.599198 | 0.000006  |
| 13 | 8  | 0 | 2.183900  | 0.444502  | -0.000094 |
| 14 | 1  | 0 | 2.361800  | -1.572898 | 0.000606  |
| 15 | 50 | 0 | 0.000000  | 0.485202  | 0.000306  |
| 16 | 17 | 0 | 0.000200  | 2.125202  | 1.729506  |
| 17 | 17 | 0 | -0.000200 | 2.125302  | -1.728794 |
| 18 | 17 | 0 | 0.000100  | -1.298498 | 1.682006  |
| 19 | 17 | 0 | -0.000100 | -1.298398 | -1.681394 |
| 20 | 8  | 0 | -2.183900 | 0.444502  | 0.000306  |
| 21 | 6  | 0 | -2.866900 | -0.599198 | 0.000506  |
| 22 | 6  | 0 | -4.313500 | -0.582098 | 0.000006  |
| 23 | 1  | 0 | -2.361800 | -1.572898 | 0.000806  |
| 24 | 6  | 0 | -5.027800 | 0.633102  | -0.000994 |
| 25 | 6  | 0 | -5.000700 | -1.810398 | 0.000506  |
| 26 | 6  | 0 | -6.415800 | 0.609902  | -0.001494 |
| 27 | 1  | 0 | -4.477800 | 1.568502  | -0.001394 |
| 28 | 6  | 0 | -6.391900 | -1.824998 | 0.000006  |
| 29 | 1  | 0 | -4.438400 | -2.740598 | 0.001206  |
| 30 | 6  | 0 | -7.095100 | -0.616398 | -0.000994 |
| 31 | 1  | 0 | -6.975300 | 1.540302  | -0.002194 |
| 32 | 1  | 0 | -6.928000 | -2.768898 | 0.000406  |
| 33 | 1  | 0 | -8.181700 | -0.627598 | -0.001394 |

**Frequency Data:**

Temperature 298.150 Kelvin. Pressure 1.00000 Atm.

|                                              |                             |
|----------------------------------------------|-----------------------------|
| Zero-point correction=                       | 0.229482 (Hartree/Particle) |
| Thermal correction to Energy=                | 0.252934                    |
| Thermal correction to Enthalpy=              | 0.253878                    |
| Thermal correction to Gibbs Free Energy=     | 0.170918                    |
| Sum of electronic and zero-point Energies=   | -2535.248609                |
| Sum of electronic and thermal Energies=      | -2535.225158                |
| Sum of electronic and thermal Enthalpies=    | -2535.224213                |
| Sum of electronic and thermal Free Energies= | -2535.307173                |

**C-4**

Cartesian Coordinates (Angstroms):

|    |    |   |           |           |           |
|----|----|---|-----------|-----------|-----------|
| 1  | 6  | 0 | 2.516889  | 0.307769  | 0.287194  |
| 2  | 8  | 0 | 1.375582  | 0.262442  | -0.204204 |
| 3  | 50 | 0 | 0.000054  | -1.490986 | -0.000067 |
| 4  | 8  | 0 | -1.376036 | 0.262037  | 0.205908  |
| 5  | 6  | 0 | -2.517418 | 0.307082  | -0.285438 |
| 6  | 6  | 0 | -3.425991 | 1.416083  | -0.061713 |
| 7  | 6  | 0 | -4.685951 | 1.390963  | -0.686105 |
| 8  | 6  | 0 | -3.066425 | 2.495740  | 0.768440  |
| 9  | 6  | 0 | -5.579502 | 2.439384  | -0.486842 |
| 10 | 1  | 0 | -4.954226 | 0.550756  | -1.321438 |
| 11 | 6  | 0 | -3.963664 | 3.537156  | 0.964734  |
| 12 | 1  | 0 | -2.092704 | 2.489606  | 1.247255  |
| 13 | 6  | 0 | -5.216899 | 3.508694  | 0.337352  |
| 14 | 1  | 0 | -6.553161 | 2.425228  | -0.966745 |
| 15 | 1  | 0 | -3.697076 | 4.371829  | 1.606072  |
| 16 | 1  | 0 | -5.915270 | 4.325913  | 0.495831  |
| 17 | 1  | 0 | -2.869564 | -0.520088 | -0.915147 |
| 18 | 17 | 0 | -1.859244 | -2.972978 | 0.201146  |
| 19 | 17 | 0 | 0.276231  | -1.089987 | 2.357653  |
| 20 | 17 | 0 | 1.859862  | -2.972095 | -0.203134 |
| 21 | 17 | 0 | -0.276053 | -1.087453 | -2.357372 |
| 22 | 6  | 0 | 3.425622  | 1.416475  | 0.062702  |
| 23 | 6  | 0 | 3.066239  | 2.495502  | -0.768351 |
| 24 | 6  | 0 | 4.685535  | 1.391672  | 0.687181  |
| 25 | 6  | 0 | 3.963633  | 3.536630  | -0.965454 |
| 26 | 1  | 0 | 2.092545  | 2.489089  | -1.247217 |
| 27 | 6  | 0 | 5.579246  | 2.439803  | 0.487094  |
| 28 | 1  | 0 | 4.953662  | 0.551945  | 1.323209  |
| 29 | 6  | 0 | 5.216837  | 3.508489  | -0.337993 |
| 30 | 1  | 0 | 3.697203  | 4.370817  | -1.607488 |
| 31 | 1  | 0 | 6.552882  | 2.425897  | 0.967050  |
| 32 | 1  | 0 | 5.915346  | 4.325463  | -0.497121 |
| 33 | 1  | 0 | 2.868856  | -0.518925 | 0.917669  |

**Frequency Data:**

|                                          |                             |          |              |
|------------------------------------------|-----------------------------|----------|--------------|
| Temperature                              | 298.150 Kelvin.             | Pressure | 1.00000 Atm. |
| Zero-point correction=                   | 0.229463 (Hartree/Particle) |          |              |
| Thermal correction to Energy=            | 0.252864                    |          |              |
| Thermal correction to Enthalpy=          | 0.253808                    |          |              |
| Thermal correction to Gibbs Free Energy= | 0.171165                    |          |              |

Sum of electronic and zero-point Energies= -2535.251994  
 Sum of electronic and thermal Energies= -2535.228592  
 Sum of electronic and thermal Enthalpies= -2535.227648  
 Sum of electronic and thermal Free Energies= -2535.310291

### SnCl<sub>4</sub>

Cartesian Coordinates (Angstroms):

|   |    |   |           |           |          |
|---|----|---|-----------|-----------|----------|
| 1 | 50 | 0 | 0.000000  | 0.000000  | 0.000000 |
| 2 | 17 | 0 | 0.000000  | 2.366193  | 0.000000 |
| 3 | 17 | 0 | 2.366193  | 0.000000  | 0.000000 |
| 4 | 17 | 0 | -2.366193 | 0.000000  | 0.000000 |
| 5 | 17 | 0 | 0.000000  | -2.366193 | 0.000000 |

#### Frequency Data:

Temperature 298.150 Kelvin. Pressure 1.00000 Atm.  
 Zero-point correction= 0.004374 (Hartree/Particle)  
 Thermal correction to Energy= 0.011316  
 Thermal correction to Enthalpy= 0.012260  
 Thermal correction to Gibbs Free Energy= -0.027764  
 Sum of electronic and zero-point Energies= -1844.237862  
 Sum of electronic and thermal Energies= -1844.230920  
 Sum of electronic and thermal Enthalpies= -1844.229976  
 Sum of electronic and thermal Free Energies= -1844.270001

### 4-Methoxy Benzaldehyde

Cartesian Coordinates (Angstroms):

|    |   |   |           |           |           |
|----|---|---|-----------|-----------|-----------|
| 1  | 6 | 0 | -0.537989 | 1.286012  | 0.000006  |
| 2  | 6 | 0 | 0.834755  | 1.043985  | 0.000004  |
| 3  | 6 | 0 | 1.295246  | -0.280705 | 0.000002  |
| 4  | 6 | 0 | 0.375571  | -1.348336 | 0.000002  |
| 5  | 6 | 0 | -0.982303 | -1.091570 | 0.000004  |
| 6  | 6 | 0 | -1.458882 | 0.233522  | 0.000005  |
| 7  | 1 | 0 | -0.899204 | 2.312628  | 0.000007  |
| 8  | 1 | 0 | 1.528233  | 1.876682  | 0.000002  |
| 9  | 1 | 0 | 0.764391  | -2.361749 | 0.000001  |
| 10 | 1 | 0 | -1.705173 | -1.901710 | 0.000004  |
| 11 | 6 | 0 | -2.905027 | 0.511796  | 0.000005  |
| 12 | 8 | 0 | -3.779781 | -0.335987 | -0.000046 |
| 13 | 1 | 0 | -3.166395 | 1.594622  | -0.000044 |
| 14 | 8 | 0 | 2.604210  | -0.640699 | -0.000001 |
| 15 | 6 | 0 | 3.593529  | 0.380245  | 0.000023  |
| 16 | 1 | 0 | 4.554010  | -0.137307 | 0.000039  |
| 17 | 1 | 0 | 3.519673  | 1.010323  | -0.895384 |
| 18 | 1 | 0 | 3.519639  | 1.010314  | 0.895434  |

#### Frequency Data:

Temperature 298.150 Kelvin. Pressure 1.00000 Atm.  
 Zero-point correction= 0.143085 (Hartree/Particle)  
 Thermal correction to Energy= 0.151908



|                                              |             |
|----------------------------------------------|-------------|
| Thermal correction to Enthalpy=              | 0.152852    |
| Thermal correction to Gibbs Free Energy=     | 0.109118    |
| Sum of electronic and zero-point Energies=   | -459.955596 |
| Sum of electronic and thermal Energies=      | -459.946773 |
| Sum of electronic and thermal Enthalpies=    | -459.945828 |
| Sum of electronic and thermal Free Energies= | -459.989563 |

#### **4-Methyl Benzaldehyde**

Cartesian Coordinates (Angstroms):

|    |   |   |           |           |           |
|----|---|---|-----------|-----------|-----------|
| 1  | 6 | 0 | -0.915133 | -1.200550 | -0.000005 |
| 2  | 6 | 0 | -1.754575 | -0.074922 | -0.000009 |
| 3  | 6 | 0 | -1.165753 | 1.199354  | -0.000006 |
| 4  | 6 | 0 | 0.217710  | 1.343391  | 0.000006  |
| 5  | 6 | 0 | 1.047289  | 0.213507  | 0.000013  |
| 6  | 6 | 0 | 0.468265  | -1.063269 | 0.000007  |
| 7  | 6 | 0 | -3.257217 | -0.223008 | 0.000007  |
| 8  | 6 | 0 | 2.516471  | 0.372559  | 0.000026  |
| 9  | 8 | 0 | 3.316094  | -0.544814 | -0.000031 |
| 10 | 1 | 0 | -1.358194 | -2.193516 | -0.000012 |
| 11 | 1 | 0 | -1.801116 | 2.082117  | -0.000015 |
| 12 | 1 | 0 | 0.663378  | 2.336239  | 0.000007  |
| 13 | 1 | 0 | 1.121917  | -1.930373 | 0.000009  |
| 14 | 1 | 0 | -3.557414 | -1.275091 | -0.000277 |
| 15 | 1 | 0 | -3.703227 | 0.253378  | 0.881804  |
| 16 | 1 | 0 | -3.703305 | 0.253891  | -0.881470 |
| 17 | 1 | 0 | 2.866868  | 1.429492  | -0.000032 |

#### **Frequency Data:**

|                                              |                             |          |              |
|----------------------------------------------|-----------------------------|----------|--------------|
| Temperature                                  | 298.150 Kelvin.             | Pressure | 1.00000 Atm. |
| Zero-point correction=                       | 0.137673 (Hartree/Particle) |          |              |
| Thermal correction to Energy=                | 0.144964                    |          |              |
| Thermal correction to Enthalpy=              | 0.145908                    |          |              |
| Thermal correction to Gibbs Free Energy=     | 0.105753                    |          |              |
| Sum of electronic and zero-point Energies=   | -384.754577                 |          |              |
| Sum of electronic and thermal Energies=      | -384.747285                 |          |              |
| Sum of electronic and thermal Enthalpies=    | -384.746341                 |          |              |
| Sum of electronic and thermal Free Energies= | -384.786496                 |          |              |

#### **4-Chloro Benzaldehyde**

Cartesian Coordinates (Angstroms):

|   |    |   |           |           |           |
|---|----|---|-----------|-----------|-----------|
| 1 | 6  | 0 | -0.545855 | -1.171681 | -0.000011 |
| 2 | 6  | 0 | -1.326669 | -0.010723 | -0.000005 |
| 3 | 6  | 0 | -0.748685 | 1.259650  | 0.000007  |
| 4 | 6  | 0 | 0.640247  | 1.363292  | 0.000013  |
| 5 | 6  | 0 | 1.441275  | 0.214794  | 0.000007  |
| 6 | 6  | 0 | 0.838195  | -1.052111 | -0.000004 |
| 7 | 17 | 0 | -3.074477 | -0.155939 | -0.000012 |
| 8 | 6  | 0 | 2.916227  | 0.339269  | 0.000014  |

|    |   |   |           |           |           |
|----|---|---|-----------|-----------|-----------|
| 9  | 8 | 0 | 3.687978  | -0.600333 | 0.000007  |
| 10 | 1 | 0 | -1.023856 | -2.145424 | -0.000020 |
| 11 | 1 | 0 | -1.377205 | 2.143499  | 0.000011  |
| 12 | 1 | 0 | 1.106965  | 2.345942  | 0.000022  |
| 13 | 1 | 0 | 1.474784  | -1.931588 | -0.000009 |
| 14 | 1 | 0 | 3.293183  | 1.386246  | 0.000021  |

**Frequency Data:**

Temperature 298.150 Kelvin. Pressure 1.00000 Atm.  
 Zero-point correction= 0.100530 (Hartree/Particle)  
 Thermal correction to Energy= 0.108005  
 Thermal correction to Enthalpy= 0.108949  
 Thermal correction to Gibbs Free Energy= 0.067787  
 Sum of electronic and zero-point Energies= -805.068330  
 Sum of electronic and thermal Energies= -805.060855  
 Sum of electronic and thermal Enthalpies= -805.059911  
 Sum of electronic and thermal Free Energies= -805.101073

**4-(trifluoromethyl) Benzaldehyde**

Cartesian Coordinates (Angstroms):

|    |   |   |           |           |           |
|----|---|---|-----------|-----------|-----------|
| 1  | 6 | 0 | -0.070811 | 1.152608  | -0.000036 |
| 2  | 6 | 0 | 0.712260  | -0.006293 | -0.000042 |
| 3  | 6 | 0 | 0.113042  | -1.270680 | -0.000032 |
| 4  | 6 | 0 | -1.274198 | -1.371880 | -0.000011 |
| 5  | 6 | 0 | -2.065600 | -0.215430 | -0.000005 |
| 6  | 6 | 0 | -1.457616 | 1.046991  | -0.000020 |
| 7  | 6 | 0 | 2.217721  | 0.075611  | 0.000003  |
| 8  | 6 | 0 | -3.545113 | -0.331124 | 0.000012  |
| 9  | 8 | 0 | -4.307852 | 0.614460  | 0.000026  |
| 10 | 1 | 0 | 0.407539  | 2.125504  | -0.000052 |
| 11 | 1 | 0 | 0.730858  | -2.163394 | -0.000051 |
| 12 | 1 | 0 | -1.749560 | -2.350079 | -0.000005 |
| 13 | 1 | 0 | -2.089476 | 1.929558  | -0.000021 |
| 14 | 1 | 0 | -3.929791 | -1.374743 | 0.000037  |
| 15 | 9 | 0 | 2.741400  | -0.538136 | 1.085312  |
| 16 | 9 | 0 | 2.663214  | 1.348073  | -0.000461 |
| 17 | 9 | 0 | 2.741512  | -0.538976 | -1.084775 |

**Frequency Data:**

Temperature 298.150 Kelvin. Pressure 1.00000 Atm.  
 Zero-point correction= 0.114836 (Hartree/Particle)  
 Thermal correction to Energy= 0.123844  
 Thermal correction to Enthalpy= 0.124788  
 Thermal correction to Gibbs Free Energy= 0.079952  
 Sum of electronic and zero-point Energies= -682.493934  
 Sum of electronic and thermal Energies= -682.484926  
 Sum of electronic and thermal Enthalpies= -682.483982  
 Sum of electronic and thermal Free Energies= -682.528818

**4-cyano Benzaldehyde**

Cartesian Coordinates (Angstroms):

|    |   |   |           |           |           |
|----|---|---|-----------|-----------|-----------|
| 1  | 6 | 0 | -0.864162 | 1.256927  | 0.000001  |
| 2  | 6 | 0 | 0.522728  | 1.361968  | -0.000004 |
| 3  | 6 | 0 | 1.319944  | 0.210559  | -0.000010 |
| 4  | 6 | 0 | 0.720749  | -1.058254 | -0.000011 |
| 5  | 6 | 0 | -0.661690 | -1.175708 | -0.000006 |
| 6  | 6 | 0 | -1.460201 | -0.015433 | 0.000000  |
| 7  | 6 | 0 | 2.799605  | 0.334438  | -0.000018 |
| 8  | 8 | 0 | 3.564490  | -0.608985 | 0.000023  |
| 9  | 6 | 0 | -2.889890 | -0.132854 | 0.000005  |
| 10 | 7 | 0 | -4.049138 | -0.228090 | 0.000009  |
| 11 | 1 | 0 | -1.489747 | 2.143331  | 0.000005  |
| 12 | 1 | 0 | 0.992461  | 2.342751  | -0.000003 |
| 13 | 1 | 0 | 1.359939  | -1.935461 | -0.000015 |
| 14 | 1 | 0 | -1.136579 | -2.151353 | -0.000007 |
| 15 | 1 | 0 | 3.179477  | 1.379377  | 0.000032  |

**Frequency Data:**

Temperature 298.150 Kelvin. Pressure 1.00000 Atm.  
 Zero-point correction= 0.108639 (Hartree/Particle)  
 Thermal correction to Energy= 0.116743  
 Thermal correction to Enthalpy= 0.117687  
 Thermal correction to Gibbs Free Energy= 0.075347  
 Sum of electronic and zero-point Energies= -437.705317  
 Sum of electronic and thermal Energies= -437.697214  
 Sum of electronic and thermal Enthalpies= -437.696270  
 Sum of electronic and thermal Free Energies= -437.738610

**(4-Methoxy Benzaldehyde)<sub>2</sub>SnCl<sub>4</sub> Intermediate**

Cartesian Coordinates (Angstroms):

|    |    |   |           |           |           |
|----|----|---|-----------|-----------|-----------|
| 1  | 6  | 0 | 2.459611  | -0.274999 | 0.342665  |
| 2  | 8  | 0 | 1.328422  | -0.335487 | -0.182115 |
| 3  | 50 | 0 | -0.044042 | -2.060177 | 0.042171  |
| 4  | 8  | 0 | -1.424419 | -0.332252 | 0.112229  |
| 5  | 6  | 0 | -2.533850 | -0.301665 | -0.460380 |
| 6  | 6  | 0 | -3.460378 | 0.790498  | -0.310450 |
| 7  | 6  | 0 | -4.681907 | 0.764911  | -1.018573 |
| 8  | 6  | 0 | -3.178284 | 1.879604  | 0.537106  |
| 9  | 6  | 0 | -5.589893 | 1.797377  | -0.888162 |
| 10 | 1  | 0 | -4.906001 | -0.075498 | -1.670407 |
| 11 | 6  | 0 | -4.083734 | 2.918760  | 0.677843  |
| 12 | 1  | 0 | -2.241473 | 1.886645  | 1.084939  |
| 13 | 6  | 0 | -5.298240 | 2.882927  | -0.037619 |
| 14 | 1  | 0 | -6.533817 | 1.798880  | -1.422491 |
| 15 | 1  | 0 | -3.852898 | 3.745948  | 1.338332  |
| 16 | 1  | 0 | -2.829457 | -1.136792 | -1.107573 |
| 17 | 17 | 0 | -1.901310 | -3.553089 | 0.235970  |

|    |    |   |           |           |           |
|----|----|---|-----------|-----------|-----------|
| 18 | 17 | 0 | 0.141564  | -1.576471 | 2.399031  |
| 19 | 17 | 0 | 1.817884  | -3.562021 | -0.017299 |
| 20 | 17 | 0 | -0.220545 | -1.793692 | -2.350148 |
| 21 | 6  | 0 | 3.369866  | 0.817496  | 0.115895  |
| 22 | 6  | 0 | 3.043079  | 1.889436  | -0.747404 |
| 23 | 6  | 0 | 4.618029  | 0.811333  | 0.763050  |
| 24 | 6  | 0 | 3.939923  | 2.916596  | -0.946645 |
| 25 | 1  | 0 | 2.081990  | 1.882783  | -1.250984 |
| 26 | 6  | 0 | 5.528770  | 1.841781  | 0.569891  |
| 27 | 1  | 0 | 4.873427  | -0.013100 | 1.423934  |
| 28 | 6  | 0 | 5.191044  | 2.902462  | -0.289477 |
| 29 | 1  | 0 | 3.716975  | 3.748700  | -1.606210 |
| 30 | 1  | 0 | 6.485041  | 1.817512  | 1.077928  |
| 31 | 1  | 0 | 2.790238  | -1.084390 | 1.005523  |
| 32 | 8  | 0 | -6.246048 | 3.839113  | 0.026723  |
| 33 | 8  | 0 | 5.991834  | 3.953449  | -0.554844 |
| 34 | 6  | 0 | -6.041342 | 4.968086  | 0.873808  |
| 35 | 6  | 0 | 7.280094  | 4.018288  | 0.053941  |
| 36 | 1  | 0 | 7.732394  | 4.939765  | -0.313878 |
| 37 | 1  | 0 | 7.200474  | 4.059822  | 1.146691  |
| 38 | 1  | 0 | 7.900123  | 3.163041  | -0.239337 |
| 39 | 1  | 0 | -5.939208 | 4.663750  | 1.922007  |
| 40 | 1  | 0 | -6.932421 | 5.585969  | 0.758849  |
| 41 | 1  | 0 | -5.157424 | 5.539528  | 0.566812  |

**Frequency Data:**

Temperature 298.150 Kelvin. Pressure 1.00000 Atm.  
 Zero-point correction= 0.295433 (Hartree/Particle)  
 Thermal correction to Energy= 0.323939  
 Thermal correction to Enthalpy= 0.324883  
 Thermal correction to Gibbs Free Energy= 0.230503  
 Sum of electronic and zero-point Energies= -2764.239131  
 Sum of electronic and thermal Energies= -2764.210625  
 Sum of electronic and thermal Enthalpies= -2764.209681  
 Sum of electronic and thermal Free Energies= -2764.304061

**(4-Methyl Benzaldehyde)<sub>2</sub>SnCl<sub>4</sub> Intermediate**

Cartesian Coordinates (Angstroms):

|    |    |   |           |           |           |
|----|----|---|-----------|-----------|-----------|
| 1  | 6  | 0 | -2.507607 | -0.007818 | -0.356931 |
| 2  | 8  | 0 | -1.378146 | -0.051843 | 0.165662  |
| 3  | 50 | 0 | 0.000023  | -1.795192 | -0.000046 |
| 4  | 8  | 0 | 1.377975  | -0.051667 | -0.165439 |
| 5  | 6  | 0 | 2.507350  | -0.007570 | 0.357343  |
| 6  | 6  | 0 | 3.421396  | 1.096336  | 0.157822  |
| 7  | 6  | 0 | 4.666109  | 1.074240  | 0.809842  |
| 8  | 6  | 0 | 3.091976  | 2.181356  | -0.680168 |
| 9  | 6  | 0 | 5.564969  | 2.120282  | 0.631075  |
| 10 | 1  | 0 | 4.921789  | 0.236274  | 1.453427  |
| 11 | 6  | 0 | 3.996321  | 3.215846  | -0.851975 |
| 12 | 1  | 0 | 2.131436  | 2.183441  | -1.185126 |

|    |    |   |           |           |           |
|----|----|---|-----------|-----------|-----------|
| 13 | 6  | 0 | 5.246572  | 3.203857  | -0.200689 |
| 14 | 1  | 0 | 6.525755  | 2.099212  | 1.137718  |
| 15 | 1  | 0 | 3.743541  | 4.050405  | -1.501134 |
| 16 | 1  | 0 | 2.840077  | -0.835040 | 0.996913  |
| 17 | 17 | 0 | 1.861661  | -3.283992 | -0.151322 |
| 18 | 17 | 0 | -0.211240 | -1.403248 | -2.368122 |
| 19 | 17 | 0 | -1.861454 | -3.284238 | 0.151018  |
| 20 | 17 | 0 | 0.211202  | -1.403665 | 2.368123  |
| 21 | 6  | 0 | -3.421556 | 1.096195  | -0.157549 |
| 22 | 6  | 0 | -3.091946 | 2.181403  | 0.680124  |
| 23 | 6  | 0 | -4.666357 | 1.074025  | -0.809396 |
| 24 | 6  | 0 | -3.996197 | 3.215998  | 0.851797  |
| 25 | 1  | 0 | -2.131338 | 2.183547  | 1.184952  |
| 26 | 6  | 0 | -5.565112 | 2.120182  | -0.630784 |
| 27 | 1  | 0 | -4.922186 | 0.235908  | -1.452725 |
| 28 | 6  | 0 | -5.246525 | 3.203948  | 0.200661  |
| 29 | 1  | 0 | -3.743276 | 4.050688  | 1.500732  |
| 30 | 1  | 0 | -6.525969 | 2.099055  | -1.137289 |
| 31 | 1  | 0 | -2.840503 | -0.835449 | -0.996207 |
| 32 | 6  | 0 | -6.218698 | 4.337866  | 0.407229  |
| 33 | 6  | 0 | 6.218875  | 4.337621  | -0.407491 |
| 34 | 1  | 0 | -7.126007 | 4.205964  | -0.188816 |
| 35 | 1  | 0 | -5.766991 | 5.298758  | 0.132301  |
| 36 | 1  | 0 | -6.513898 | 4.412940  | 1.461205  |
| 37 | 1  | 0 | 5.767195  | 5.298659  | -0.133037 |
| 38 | 1  | 0 | 6.514268  | 4.412270  | -1.461448 |
| 39 | 1  | 0 | 7.126066  | 4.205859  | 0.188760  |

**Frequency Data:**

Temperature 298.150 Kelvin. Pressure 1.00000 Atm.  
 Zero-point correction= 0.284495 (Hartree/Particle)  
 Thermal correction to Energy= 0.311644  
 Thermal correction to Enthalpy= 0.312588  
 Thermal correction to Gibbs Free Energy= 0.220378  
 Sum of electronic and zero-point Energies= -2613.835638  
 Sum of electronic and thermal Energies= -2613.808489  
 Sum of electronic and thermal Enthalpies= -2613.807545  
 Sum of electronic and thermal Free Energies= -2613.899754

**(4-chloro Benzaldehyde)<sub>2</sub>SnCl<sub>4</sub> Intermediate**

Cartesian Coordinates (Angstroms):

|   |    |   |           |           |           |
|---|----|---|-----------|-----------|-----------|
| 1 | 6  | 0 | 2.512155  | -0.290117 | 0.387460  |
| 2 | 8  | 0 | 1.387791  | -0.324963 | -0.141945 |
| 3 | 50 | 0 | 0.000002  | -2.081974 | 0.000035  |
| 4 | 8  | 0 | -1.387829 | -0.325002 | 0.142008  |
| 5 | 6  | 0 | -2.512189 | -0.290165 | -0.387406 |
| 6 | 6  | 0 | -3.430310 | 0.817100  | -0.202663 |
| 7 | 6  | 0 | -4.669320 | 0.790672  | -0.866888 |
| 8 | 6  | 0 | -3.103092 | 1.903852  | 0.631516  |
| 9 | 6  | 0 | -5.573082 | 1.835049  | -0.710409 |

|    |    |   |           |           |           |
|----|----|---|-----------|-----------|-----------|
| 10 | 1  | 0 | -4.921213 | -0.051128 | -1.506455 |
| 11 | 6  | 0 | -3.999691 | 2.948704  | 0.795467  |
| 12 | 1  | 0 | -2.147495 | 1.905747  | 1.145467  |
| 13 | 6  | 0 | -5.227865 | 2.905251  | 0.120513  |
| 14 | 1  | 0 | -6.531101 | 1.827101  | -1.217787 |
| 15 | 1  | 0 | -3.765393 | 3.791010  | 1.436870  |
| 16 | 1  | 0 | -2.840706 | -1.124044 | -1.020925 |
| 17 | 17 | 0 | -1.867020 | -3.560982 | 0.119519  |
| 18 | 17 | 0 | 0.170575  | -1.669410 | 2.364199  |
| 19 | 17 | 0 | 1.867079  | -3.560913 | -0.119432 |
| 20 | 17 | 0 | -0.170592 | -1.669422 | -2.364126 |
| 21 | 6  | 0 | 3.430288  | 0.817129  | 0.202660  |
| 22 | 6  | 0 | 3.103076  | 1.903845  | -0.631567 |
| 23 | 6  | 0 | 4.669303  | 0.790717  | 0.866876  |
| 24 | 6  | 0 | 3.999685  | 2.948680  | -0.795574 |
| 25 | 1  | 0 | 2.147477  | 1.905726  | -1.145514 |
| 26 | 6  | 0 | 5.573075  | 1.835078  | 0.710344  |
| 27 | 1  | 0 | 4.921191  | -0.051057 | 1.506479  |
| 28 | 6  | 0 | 5.227864  | 2.905245  | -0.120625 |
| 29 | 1  | 0 | 3.765393  | 3.790957  | -1.437015 |
| 30 | 1  | 0 | 6.531097  | 1.827143  | 1.217715  |
| 31 | 1  | 0 | 2.840670  | -1.123975 | 1.021008  |
| 32 | 17 | 0 | 6.355153  | 4.220783  | -0.326179 |
| 33 | 17 | 0 | -6.355142 | 4.220810  | 0.325998  |

**Frequency Data:**

Temperature 298.150 Kelvin. Pressure 1.00000 Atm.  
 Zero-point correction= 0.209941 (Hartree/Particle)  
 Thermal correction to Energy= 0.235796  
 Thermal correction to Enthalpy= 0.236740  
 Thermal correction to Gibbs Free Energy= 0.147193  
 Sum of electronic and zero-point Energies= -3454.453351  
 Sum of electronic and thermal Energies= -3454.427496  
 Sum of electronic and thermal Enthalpies= -3454.426552  
 Sum of electronic and thermal Free Energies= -3454.516100

**(4-trifluoromethyl Benzaldehyde)<sub>2</sub>SnCl<sub>4</sub> Intermediate**

Cartesian Coordinates (Angstroms):

|    |    |   |           |           |           |
|----|----|---|-----------|-----------|-----------|
| 1  | 6  | 0 | 2.516610  | -0.794165 | 0.420048  |
| 2  | 8  | 0 | 1.394371  | -0.820943 | -0.108373 |
| 3  | 50 | 0 | 0.000000  | -2.592178 | -0.000010 |
| 4  | 8  | 0 | -1.394440 | -0.821012 | 0.108494  |
| 5  | 6  | 0 | -2.516630 | -0.794207 | -0.420029 |
| 6  | 6  | 0 | -3.430229 | 0.328381  | -0.263856 |
| 7  | 6  | 0 | -4.666114 | 0.289815  | -0.929150 |
| 8  | 6  | 0 | -3.091407 | 1.434010  | 0.538965  |
| 9  | 6  | 0 | -5.560089 | 1.348934  | -0.799083 |
| 10 | 1  | 0 | -4.921219 | -0.567053 | -1.546801 |
| 11 | 6  | 0 | -3.984053 | 2.487449  | 0.668307  |

|    |    |   |           |           |           |
|----|----|---|-----------|-----------|-----------|
| 12 | 1  | 0 | -2.134405 | 1.443035  | 1.049736  |
| 13 | 6  | 0 | -5.216178 | 2.442769  | -0.001172 |
| 14 | 1  | 0 | -6.513843 | 1.331485  | -1.313773 |
| 15 | 1  | 0 | -3.733791 | 3.347860  | 1.279860  |
| 16 | 1  | 0 | -2.852576 | -1.643041 | -1.029810 |
| 17 | 17 | 0 | -1.871053 | -4.064841 | 0.077734  |
| 18 | 17 | 0 | 0.116664  | -2.163568 | 2.360983  |
| 19 | 17 | 0 | 1.871219  | -4.064633 | -0.077812 |
| 20 | 17 | 0 | -0.116747 | -2.163424 | -2.360956 |
| 21 | 6  | 0 | 3.430169  | 0.328458  | 0.263901  |
| 22 | 6  | 0 | 3.091102  | 1.434323  | -0.538483 |
| 23 | 6  | 0 | 4.666286  | 0.289675  | 0.928764  |
| 24 | 6  | 0 | 3.983727  | 2.487788  | -0.667829 |
| 25 | 1  | 0 | 2.133925  | 1.443522  | -1.048921 |
| 26 | 6  | 0 | 5.560250  | 1.348789  | 0.798661  |
| 27 | 1  | 0 | 4.921571  | -0.567365 | 1.546100  |
| 28 | 6  | 0 | 5.216089  | 2.442872  | 0.001184  |
| 29 | 1  | 0 | 3.733259  | 3.348391  | -1.279022 |
| 30 | 1  | 0 | 6.514189  | 1.331165  | 1.313007  |
| 31 | 1  | 0 | 2.852645  | -1.643066 | 1.029683  |
| 32 | 6  | 0 | 6.192679  | 3.579923  | -0.192539 |
| 33 | 6  | 0 | -6.192668 | 3.579911  | 0.192505  |
| 34 | 9  | 0 | -7.125826 | 3.613123  | -0.778588 |
| 35 | 9  | 0 | -6.836962 | 3.464235  | 1.372374  |
| 36 | 9  | 0 | -5.559255 | 4.771113  | 0.198414  |
| 37 | 9  | 0 | 5.559303  | 4.771129  | -0.199555 |
| 38 | 9  | 0 | 7.125202  | 3.613668  | 0.779159  |
| 39 | 9  | 0 | 6.837778  | 3.463532  | -1.371899 |

**Frequency Data:**

Temperature 298.150 Kelvin. Pressure 1.00000 Atm.  
 Zero-point correction= 0.238626 (Hartree/Particle)  
 Thermal correction to Energy= 0.269389  
 Thermal correction to Enthalpy= 0.270333  
 Thermal correction to Gibbs Free Energy= 0.167907  
 Sum of electronic and zero-point Energies= -3209.302662  
 Sum of electronic and thermal Energies= -3209.271898  
 Sum of electronic and thermal Enthalpies= -3209.270954  
 Sum of electronic and thermal Free Energies= -3209.373381

**(4-Cyano Benzaldehyde)<sub>2</sub>SnCl<sub>4</sub> Intermediate**

Cartesian Coordinates (Angstroms):

|   |    |   |           |           |           |
|---|----|---|-----------|-----------|-----------|
| 1 | 6  | 0 | 2.525775  | -0.186728 | 0.379661  |
| 2 | 8  | 0 | 1.398530  | -0.213223 | -0.136628 |
| 3 | 50 | 0 | 0.000004  | -1.988809 | 0.000003  |
| 4 | 8  | 0 | -1.398538 | -0.213238 | 0.136665  |
| 5 | 6  | 0 | -2.525748 | -0.186712 | -0.379698 |
| 6 | 6  | 0 | -3.446252 | 0.926911  | -0.192445 |
| 7 | 6  | 0 | -4.689077 | 0.893823  | -0.847346 |
| 8 | 6  | 0 | -3.106893 | 2.014857  | 0.633676  |

|    |    |   |           |           |           |
|----|----|---|-----------|-----------|-----------|
| 9  | 6  | 0 | -5.589082 | 1.940409  | -0.687909 |
| 10 | 1  | 0 | -4.944774 | 0.047901  | -1.479513 |
| 11 | 6  | 0 | -4.001551 | 3.060478  | 0.799007  |
| 12 | 1  | 0 | -2.146531 | 2.015711  | 1.138169  |
| 13 | 6  | 0 | -5.245379 | 3.026243  | 0.136274  |
| 14 | 1  | 0 | -6.550729 | 1.927671  | -1.189021 |
| 15 | 1  | 0 | -3.757266 | 3.904694  | 1.434711  |
| 16 | 1  | 0 | -2.862119 | -1.026449 | -1.001694 |
| 17 | 17 | 0 | -1.871160 | -3.455996 | 0.110279  |
| 18 | 17 | 0 | 0.158355  | -1.549659 | 2.355397  |
| 19 | 17 | 0 | 1.871181  | -3.455977 | -0.110295 |
| 20 | 17 | 0 | -0.158350 | -1.549623 | -2.355383 |
| 21 | 6  | 0 | 3.446262  | 0.926911  | 0.192423  |
| 22 | 6  | 0 | 3.106843  | 2.014914  | -0.633600 |
| 23 | 6  | 0 | 4.689131  | 0.893782  | 0.847239  |
| 24 | 6  | 0 | 4.001486  | 3.060549  | -0.798918 |
| 25 | 1  | 0 | 2.146448  | 2.015799  | -1.138029 |
| 26 | 6  | 0 | 5.589120  | 1.940383  | 0.687815  |
| 27 | 1  | 0 | 4.944873  | 0.047817  | 1.479329  |
| 28 | 6  | 0 | 5.245358  | 3.026273  | -0.136270 |
| 29 | 1  | 0 | 3.757156  | 3.904809  | -1.434547 |
| 30 | 1  | 0 | 6.550801  | 1.927615  | 1.188862  |
| 31 | 1  | 0 | 2.862191  | -1.026508 | 1.001575  |
| 32 | 6  | 0 | -6.169213 | 4.110250  | 0.306024  |
| 33 | 7  | 0 | -6.916344 | 4.990584  | 0.443470  |
| 34 | 6  | 0 | 6.169176  | 4.110296  | -0.306006 |
| 35 | 7  | 0 | 6.916295  | 4.990642  | -0.443441 |

**Frequency Data:**

Temperature 298.150 Kelvin. Pressure 1.00000 Atm.  
 Zero-point correction= 0.225978 (Hartree/Particle)  
 Thermal correction to Energy= 0.253131  
 Thermal correction to Enthalpy= 0.254075  
 Thermal correction to Gibbs Free Energy= 0.161997  
 Sum of electronic and zero-point Energies= -2719.723566  
 Sum of electronic and thermal Energies= -2719.696413  
 Sum of electronic and thermal Enthalpies= -2719.695469  
 Sum of electronic and thermal Free Energies= -2719.787548



**(Benzaldehyde)SnCl<sub>4</sub> Intermediate**

Cartesian Coordinates (Angstroms):

|    |    |   |           |           |           |
|----|----|---|-----------|-----------|-----------|
| 1  | 6  | 0 | 3.964480  | -1.278502 | -0.009972 |
| 2  | 6  | 0 | 5.331323  | -1.018213 | -0.005372 |
| 3  | 6  | 0 | 5.782365  | 0.305333  | 0.004525  |
| 4  | 6  | 0 | 4.874191  | 1.373269  | 0.009772  |
| 5  | 6  | 0 | 3.508972  | 1.121632  | 0.005133  |
| 6  | 6  | 0 | 3.048355  | -0.210387 | -0.004700 |
| 7  | 1  | 0 | 3.598627  | -2.302231 | -0.017693 |
| 8  | 1  | 0 | 6.043163  | -1.837731 | -0.009436 |
| 9  | 1  | 0 | 5.238847  | 2.395843  | 0.017434  |
| 10 | 1  | 0 | 2.785022  | 1.929956  | 0.008907  |
| 11 | 6  | 0 | 1.630128  | -0.506774 | -0.009710 |
| 12 | 8  | 0 | 0.753774  | 0.374117  | -0.006257 |
| 13 | 1  | 0 | 1.337199  | -1.566416 | -0.017922 |
| 14 | 50 | 0 | -1.508391 | 0.038623  | 0.000324  |
| 15 | 17 | 0 | -1.029896 | -1.063626 | 2.022279  |
| 16 | 17 | 0 | -3.848415 | -0.263535 | 0.010813  |
| 17 | 17 | 0 | -1.460798 | 2.370724  | -0.088087 |
| 18 | 17 | 0 | -1.031601 | -1.206521 | -1.938749 |
| 19 | 1  | 0 | 6.849669  | 0.508642  | 0.008170  |

**Frequency Data:**

|                                              |                             |          |              |
|----------------------------------------------|-----------------------------|----------|--------------|
| Temperature                                  | 298.150 Kelvin.             | Pressure | 1.00000 Atm. |
| Zero-point correction=                       | 0.116875 (Hartree/Particle) |          |              |
| Thermal correction to Energy=                | 0.132553                    |          |              |
| Thermal correction to Enthalpy=              | 0.133497                    |          |              |
| Thermal correction to Gibbs Free Energy=     | 0.068886                    |          |              |
| Sum of electronic and zero-point Energies=   | -2189.776132                |          |              |
| Sum of electronic and thermal Energies=      | -2189.760453                |          |              |
| Sum of electronic and thermal Enthalpies=    | -2189.759509                |          |              |
| Sum of electronic and thermal Free Energies= | -2189.824120                |          |              |

**Anisole**

Cartesian Coordinates (Angstroms):

|    |   |   |           |           |           |
|----|---|---|-----------|-----------|-----------|
| 1  | 6 | 0 | -0.212750 | -1.212867 | -0.165036 |
| 2  | 6 | 0 | -1.586170 | -1.207825 | 0.083962  |
| 3  | 6 | 0 | -2.274642 | 0.000771  | 0.211120  |
| 4  | 6 | 0 | -1.585002 | 1.208644  | 0.083264  |
| 5  | 6 | 0 | -0.211604 | 1.212229  | -0.165787 |
| 6  | 6 | 0 | 0.470841  | -0.000693 | -0.290130 |
| 7  | 1 | 0 | 0.336693  | -2.142693 | -0.279678 |
| 8  | 1 | 0 | -2.119623 | -2.150529 | 0.174647  |
| 9  | 1 | 0 | -3.344035 | 0.001349  | 0.402861  |
| 10 | 1 | 0 | -2.117570 | 2.151903  | 0.173393  |
| 11 | 1 | 0 | 0.338687  | 2.141479  | -0.281057 |
| 12 | 8 | 0 | 1.821083  | -0.001547 | -0.582492 |
| 13 | 6 | 0 | 2.670002  | 0.000841  | 0.562343  |

|    |   |   |          |           |          |
|----|---|---|----------|-----------|----------|
| 14 | 1 | 0 | 2.507840 | -0.890828 | 1.184313 |
| 15 | 1 | 0 | 3.696424 | -0.000643 | 0.187123 |
| 16 | 1 | 0 | 2.508859 | 0.895749  | 1.179919 |

**Frequency Data:**

Temperature 298.150 Kelvin. Pressure 1.00000 Atm.

1 imaginary frequencies ignored.

|                                              |                             |
|----------------------------------------------|-----------------------------|
| Zero-point correction=                       | 0.132879 (Hartree/Particle) |
| Thermal correction to Energy=                | 0.139162                    |
| Thermal correction to Enthalpy=              | 0.140106                    |
| Thermal correction to Gibbs Free Energy=     | 0.102434                    |
| Sum of electronic and zero-point Energies=   | -346.633628                 |
| Sum of electronic and thermal Energies=      | -346.627346                 |
| Sum of electronic and thermal Enthalpies=    | -346.626402                 |
| Sum of electronic and thermal Free Energies= | -346.664073                 |

**(Benzaldehyde)SnCl<sub>4</sub>(anisole) TS**

Cartesian Coordinates (Angstroms):

|    |    |   |           |           |           |
|----|----|---|-----------|-----------|-----------|
| 1  | 6  | 0 | 1.240733  | 3.343274  | -1.153109 |
| 2  | 6  | 0 | 1.394866  | 4.707720  | -0.913633 |
| 3  | 6  | 0 | 1.021301  | 5.248001  | 0.320149  |
| 4  | 6  | 0 | 0.490273  | 4.417828  | 1.308484  |
| 5  | 6  | 0 | 0.338071  | 3.049660  | 1.071846  |
| 6  | 6  | 0 | 0.715406  | 2.504239  | -0.160885 |
| 7  | 1  | 0 | 1.517016  | 2.929038  | -2.120347 |
| 8  | 1  | 0 | 1.794034  | 5.350973  | -1.692947 |
| 9  | 1  | 0 | 0.184216  | 4.834742  | 2.263991  |
| 10 | 1  | 0 | -0.095827 | 2.403613  | 1.827733  |
| 11 | 6  | 0 | 0.591449  | 1.026163  | -0.433295 |
| 12 | 8  | 0 | -0.321202 | 0.362776  | 0.490219  |
| 13 | 1  | 0 | 0.290362  | 0.860986  | -1.471022 |
| 14 | 6  | 0 | 1.847203  | 0.164908  | -0.088115 |
| 15 | 6  | 0 | 2.088780  | -1.039833 | -0.841026 |
| 16 | 6  | 0 | 2.940535  | 0.668524  | 0.706436  |
| 17 | 6  | 0 | 3.251034  | -1.764244 | -0.695028 |
| 18 | 1  | 0 | 1.294852  | -1.422092 | -1.478610 |
| 19 | 6  | 0 | 4.095569  | -0.053502 | 0.857920  |
| 20 | 1  | 0 | 2.816853  | 1.617428  | 1.218548  |
| 21 | 6  | 0 | 4.265845  | -1.277720 | 0.160879  |
| 22 | 1  | 0 | 3.375367  | -2.694895 | -1.234856 |
| 23 | 1  | 0 | 4.907056  | 0.290997  | 1.490080  |
| 24 | 1  | 0 | 0.989439  | -0.287892 | 0.734970  |
| 25 | 8  | 0 | 5.423923  | -1.898413 | 0.379516  |
| 26 | 6  | 0 | 5.702955  | -3.147900 | -0.269028 |
| 27 | 1  | 0 | 4.965456  | -3.905047 | 0.015767  |
| 28 | 1  | 0 | 6.690405  | -3.441198 | 0.085666  |
| 29 | 1  | 0 | 5.720421  | -3.025817 | -1.356832 |
| 30 | 50 | 0 | -1.979136 | -0.713767 | 0.037097  |
| 31 | 17 | 0 | -1.303539 | -1.946245 | 2.007388  |
| 32 | 17 | 0 | -2.367756 | 0.832069  | -1.793681 |

|    |    |   |           |           |           |
|----|----|---|-----------|-----------|-----------|
| 33 | 17 | 0 | -1.402194 | -2.489522 | -1.445676 |
| 34 | 17 | 0 | -4.182536 | -0.451179 | 0.830267  |
| 35 | 1  | 0 | 1.133713  | 6.312820  | 0.504504  |

**Frequency Data:****NImag:** 1 (-1082.3 )

Temperature 298.150 Kelvin. Pressure 1.00000 Atm.

1 imaginary frequencies ignored.

|                                              |                             |
|----------------------------------------------|-----------------------------|
| Zero-point correction=                       | 0.248306 (Hartree/Particle) |
| Thermal correction to Energy=                | 0.271324                    |
| Thermal correction to Enthalpy=              | 0.272268                    |
| Thermal correction to Gibbs Free Energy=     | 0.190475                    |
| Sum of electronic and zero-point Energies=   | -2536.337399                |
| Sum of electronic and thermal Energies=      | -2536.314382                |
| Sum of electronic and thermal Enthalpies=    | -2536.313438                |
| Sum of electronic and thermal Free Energies= | -2536.395231                |

**(Benzaldehyde)SnCl<sub>4</sub>(anisole) Intermediate 2**

Cartesian Coordinates (Angstroms):

|    |    |   |           |           |           |
|----|----|---|-----------|-----------|-----------|
| 1  | 6  | 0 | -0.907846 | 4.118392  | 1.205453  |
| 2  | 6  | 0 | -1.413321 | 4.925891  | 0.186353  |
| 3  | 6  | 0 | -1.721714 | 4.361497  | -1.054058 |
| 4  | 6  | 0 | -1.526918 | 2.998139  | -1.268897 |
| 5  | 6  | 0 | -1.024348 | 2.181591  | -0.247112 |
| 6  | 6  | 0 | -0.713576 | 2.751649  | 0.991246  |
| 7  | 6  | 0 | -0.879798 | 0.697590  | -0.523020 |
| 8  | 6  | 0 | -2.155516 | -0.107400 | -0.394367 |
| 9  | 6  | 0 | -2.350307 | -1.242736 | -1.203020 |
| 10 | 6  | 0 | -3.489132 | -2.022701 | -1.074996 |
| 11 | 6  | 0 | -4.469255 | -1.689660 | -0.124293 |
| 12 | 6  | 0 | -4.288836 | -0.563472 | 0.690295  |
| 13 | 6  | 0 | -3.140272 | 0.216521  | 0.546293  |
| 14 | 8  | 0 | 0.132626  | 0.104012  | 0.393948  |
| 15 | 1  | 0 | -0.654232 | 4.550924  | 2.169366  |
| 16 | 1  | 0 | -1.558692 | 5.989551  | 0.353279  |
| 17 | 1  | 0 | -2.106961 | 4.983855  | -1.857021 |
| 18 | 1  | 0 | -1.767732 | 2.563658  | -2.236578 |
| 19 | 1  | 0 | -0.295436 | 2.133952  | 1.778909  |
| 20 | 1  | 0 | -0.460451 | 0.548617  | -1.520786 |
| 21 | 1  | 0 | -1.596211 | -1.514223 | -1.936661 |
| 22 | 1  | 0 | -3.648211 | -2.895877 | -1.699413 |
| 23 | 1  | 0 | -5.033254 | -0.280993 | 1.425513  |
| 24 | 1  | 0 | -3.022504 | 1.100395  | 1.166201  |
| 25 | 1  | 0 | -0.314522 | -0.508435 | 1.006827  |
| 26 | 50 | 0 | 2.294352  | -0.578311 | 0.057647  |
| 27 | 17 | 0 | 1.462573  | -1.574188 | -1.899394 |
| 28 | 17 | 0 | 4.509054  | -1.375716 | -0.071159 |
| 29 | 17 | 0 | 1.747982  | -1.598153 | 2.116934  |
| 30 | 17 | 0 | 2.726590  | 1.707848  | -0.079920 |
| 31 | 8  | 0 | -5.547502 | -2.513672 | -0.078398 |

|    |   |   |           |           |          |
|----|---|---|-----------|-----------|----------|
| 32 | 6 | 0 | -6.578758 | -2.234401 | 0.858939 |
| 33 | 1 | 0 | -7.036698 | -1.254708 | 0.671682 |
| 34 | 1 | 0 | -6.204405 | -2.269811 | 1.890026 |
| 35 | 1 | 0 | -7.327096 | -3.015941 | 0.719159 |

**Frequency Data:**

Temperature 298.150 Kelvin. Pressure 1.00000 Atm.  
 Zero-point correction= 0.253732 (Hartree/Particle)  
 Thermal correction to Energy= 0.277266  
 Thermal correction to Enthalpy= 0.278211  
 Thermal correction to Gibbs Free Energy= 0.194624  
 Sum of electronic and zero-point Energies= -2536.404359  
 Sum of electronic and thermal Energies= -2536.380825  
 Sum of electronic and thermal Enthalpies= -2536.379881  
 Sum of electronic and thermal Free Energies= -2536.463467

**SnCl<sub>4</sub>(4-methoxy Benzaldehyde) Intermediate**

Cartesian Coordinates (Angstroms):

|    |    |   |           |           |           |
|----|----|---|-----------|-----------|-----------|
| 1  | 6  | 0 | 3.363225  | 1.335943  | -0.000040 |
| 2  | 6  | 0 | 4.720201  | 1.045836  | -0.000037 |
| 3  | 6  | 0 | 5.133579  | -0.299617 | 0.000018  |
| 4  | 6  | 0 | 4.175992  | -1.340147 | 0.000059  |
| 5  | 6  | 0 | 2.831532  | -1.041717 | 0.000042  |
| 6  | 6  | 0 | 2.402163  | 0.307630  | 0.000004  |
| 7  | 1  | 0 | 3.037519  | 2.373283  | -0.000086 |
| 8  | 1  | 0 | 5.443867  | 1.851743  | -0.000076 |
| 9  | 1  | 0 | 4.532455  | -2.364743 | 0.000098  |
| 10 | 1  | 0 | 2.086637  | -1.830550 | 0.000064  |
| 11 | 6  | 0 | 1.007846  | 0.654837  | -0.000007 |
| 12 | 8  | 0 | 0.094540  | -0.196912 | -0.000081 |
| 13 | 1  | 0 | 0.744378  | 1.720620  | -0.000115 |
| 14 | 8  | 0 | 6.417320  | -0.700712 | 0.000029  |
| 15 | 6  | 0 | 7.456806  | 0.277815  | -0.000024 |
| 16 | 1  | 0 | 8.389558  | -0.286505 | 0.000004  |
| 17 | 1  | 0 | 7.407687  | 0.905960  | -0.896963 |
| 18 | 1  | 0 | 7.407691  | 0.906054  | 0.896849  |
| 19 | 50 | 0 | -2.141313 | -0.033787 | -0.000008 |
| 20 | 17 | 0 | -1.821224 | 2.306394  | -0.001411 |
| 21 | 17 | 0 | -4.506176 | 0.018808  | 0.000091  |
| 22 | 17 | 0 | -1.854824 | -1.165270 | -2.031490 |
| 23 | 17 | 0 | -1.854663 | -1.162814 | 2.032866  |

**Frequency Data:**

Temperature 298.150 Kelvin. Pressure 1.00000 Atm.  
 Zero-point correction= 0.149998 (Hartree/Particle)  
 Thermal correction to Energy= 0.168161  
 Thermal correction to Enthalpy= 0.169105  
 Thermal correction to Gibbs Free Energy= 0.098939  
 Sum of electronic and zero-point Energies= -2304.270569

Sum of electronic and thermal Energies= -2304.252406  
 Sum of electronic and thermal Enthalpies= -2304.251462  
 Sum of electronic and thermal Free Energies= -2304.321628

### SnCl<sub>4</sub>(4-Methyl Benzaldehyde) Intermediate

Cartesian Coordinates (Angstroms):

|    |    |   |           |           |           |
|----|----|---|-----------|-----------|-----------|
| 1  | 6  | 0 | 3.597310  | -1.388637 | -0.002566 |
| 2  | 6  | 0 | 4.968006  | -1.158166 | -0.000602 |
| 3  | 6  | 0 | 5.474821  | 0.150527  | 0.002389  |
| 4  | 6  | 0 | 4.568500  | 1.230837  | 0.004643  |
| 5  | 6  | 0 | 3.201278  | 1.015062  | 0.002588  |
| 6  | 6  | 0 | 2.701410  | -0.304525 | -0.001072 |
| 7  | 1  | 0 | 3.213720  | -2.405961 | -0.004591 |
| 8  | 1  | 0 | 5.656942  | -1.998020 | -0.001140 |
| 9  | 1  | 0 | 4.953226  | 2.247336  | 0.008390  |
| 10 | 1  | 0 | 2.500966  | 1.844058  | 0.004473  |
| 11 | 6  | 0 | 1.281304  | -0.566331 | -0.002649 |
| 12 | 8  | 0 | 0.424163  | 0.336793  | -0.001704 |
| 13 | 1  | 0 | 0.962160  | -1.618128 | -0.005271 |
| 14 | 50 | 0 | -1.828720 | 0.054390  | 0.000002  |
| 15 | 17 | 0 | -1.388551 | -1.112167 | 1.996667  |
| 16 | 17 | 0 | -4.177307 | -0.194455 | 0.002792  |
| 17 | 17 | 0 | -1.738917 | 2.388146  | -0.027072 |
| 18 | 17 | 0 | -1.389482 | -1.156071 | -1.971022 |
| 19 | 6  | 0 | 6.959690  | 0.408826  | -0.001942 |
| 20 | 1  | 0 | 7.532411  | -0.520423 | 0.062225  |
| 21 | 1  | 0 | 7.249745  | 1.048501  | 0.840159  |
| 22 | 1  | 0 | 7.261973  | 0.930509  | -0.918671 |

#### Frequency Data:

Temperature 298.150 Kelvin. Pressure 1.00000 Atm.  
 Zero-point correction= 0.144367 (Hartree/Particle)  
 Thermal correction to Energy= 0.161945  
 Thermal correction to Enthalpy= 0.162889  
 Thermal correction to Gibbs Free Energy= 0.092936  
 Sum of electronic and zero-point Energies= -2229.068338  
 Sum of electronic and thermal Energies= -2229.050760  
 Sum of electronic and thermal Enthalpies= -2229.049816  
 Sum of electronic and thermal Free Energies= -2229.119769

### SnCl<sub>4</sub>(4-chloro Benzaldehyde) Intermediate

Cartesian Coordinates (Angstroms):

|   |   |   |           |           |           |
|---|---|---|-----------|-----------|-----------|
| 1 | 6 | 0 | -3.354774 | 1.507740  | 0.000066  |
| 2 | 6 | 0 | -4.720581 | 1.252158  | 0.000350  |
| 3 | 6 | 0 | -5.157633 | -0.076552 | 0.000053  |
| 4 | 6 | 0 | -4.254753 | -1.149502 | -0.000490 |
| 5 | 6 | 0 | -2.893751 | -0.885825 | -0.000765 |
| 6 | 6 | 0 | -2.432415 | 0.445607  | -0.000502 |
| 7 | 1 | 0 | -2.997652 | 2.534399  | 0.000280  |

|    |    |   |           |           |           |
|----|----|---|-----------|-----------|-----------|
| 8  | 1  | 0 | -5.441674 | 2.061631  | 0.000804  |
| 9  | 1  | 0 | -4.626052 | -2.168181 | -0.000683 |
| 10 | 1  | 0 | -2.171793 | -1.695757 | -0.001164 |
| 11 | 6  | 0 | -1.014431 | 0.746250  | -0.000770 |
| 12 | 8  | 0 | -0.140035 | -0.135326 | -0.001227 |
| 13 | 1  | 0 | -0.714727 | 1.803206  | -0.000481 |
| 14 | 50 | 0 | 2.150376  | -0.057881 | -0.000054 |
| 15 | 17 | 0 | 1.885827  | 2.283744  | -0.002324 |
| 16 | 17 | 0 | 4.507749  | -0.101459 | 0.002215  |
| 17 | 17 | 0 | 1.780937  | -1.167786 | 2.025317  |
| 18 | 17 | 0 | 1.783971  | -1.170953 | -2.024094 |
| 19 | 17 | 0 | -6.868873 | -0.408127 | 0.000421  |

**Frequency Data:**

Temperature 298.150 Kelvin. Pressure 1.00000 Atm.  
 Zero-point correction= 0.107198 (Hartree/Particle)  
 Thermal correction to Energy= 0.124060  
 Thermal correction to Enthalpy= 0.125004  
 Thermal correction to Gibbs Free Energy= 0.057145  
 Sum of electronic and zero-point Energies= -2649.376737  
 Sum of electronic and thermal Energies= -2649.359876  
 Sum of electronic and thermal Enthalpies= -2649.358931  
 Sum of electronic and thermal Free Energies= -2649.426791

**SnCl<sub>4</sub>(4-trifluoromethyl Benzaldehyde) Intermediate**

Cartesian Coordinates (Angstroms):

|    |    |   |           |           |           |
|----|----|---|-----------|-----------|-----------|
| 1  | 6  | 0 | 2.721033  | -1.531975 | -0.017977 |
| 2  | 6  | 0 | 4.098132  | -1.336111 | 0.002440  |
| 3  | 6  | 0 | 4.606556  | -0.034198 | 0.036273  |
| 4  | 6  | 0 | 3.748197  | 1.074404  | 0.052643  |
| 5  | 6  | 0 | 2.374439  | 0.881922  | 0.032224  |
| 6  | 6  | 0 | 1.854766  | -0.425892 | -0.004291 |
| 7  | 1  | 0 | 2.313911  | -2.539329 | -0.042268 |
| 8  | 1  | 0 | 4.775373  | -2.182737 | -0.000973 |
| 9  | 1  | 0 | 4.162093  | 2.076130  | 0.088766  |
| 10 | 1  | 0 | 1.689838  | 1.723447  | 0.046099  |
| 11 | 6  | 0 | 0.417815  | -0.654940 | -0.025355 |
| 12 | 8  | 0 | -0.408668 | 0.267370  | -0.014066 |
| 13 | 1  | 0 | 0.074054  | -1.699121 | -0.055915 |
| 14 | 50 | 0 | -2.722822 | 0.069855  | -0.000418 |
| 15 | 17 | 0 | -2.285001 | -0.872317 | 2.104972  |
| 16 | 17 | 0 | -5.071786 | -0.091716 | 0.025420  |
| 17 | 17 | 0 | -2.512026 | 2.373179  | -0.294615 |
| 18 | 17 | 0 | -2.304124 | -1.353054 | -1.825076 |
| 19 | 6  | 0 | 6.101725  | 0.188086  | -0.000273 |
| 20 | 9  | 0 | 6.451257  | 1.301114  | 0.674408  |
| 21 | 9  | 0 | 6.531917  | 0.334472  | -1.270835 |
| 22 | 9  | 0 | 6.772285  | -0.850190 | 0.536617  |

**Frequency Data:**

Temperature 298.150 Kelvin. Pressure 1.00000 Atm.

1 imaginary frequencies ignored.  
 Zero-point correction= 0.121436 (Hartree/Particle)  
 Thermal correction to Energy= 0.139880  
 Thermal correction to Enthalpy= 0.140825  
 Thermal correction to Gibbs Free Energy= 0.069789  
 Sum of electronic and zero-point Energies= -2526.800893  
 Sum of electronic and thermal Energies= -2526.782449  
 Sum of electronic and thermal Enthalpies= -2526.781505  
 Sum of electronic and thermal Free Energies= -2526.852540

### **SnCl<sub>4</sub>(4-cyano Benzaldehyde) Intermediate**

Cartesian Coordinates (Angstroms):

|    |    |   |           |           |           |
|----|----|---|-----------|-----------|-----------|
| 1  | 6  | 0 | 3.437175  | -1.450140 | -0.021204 |
| 2  | 6  | 0 | 4.809866  | -1.236373 | -0.014182 |
| 3  | 6  | 0 | 5.303375  | 0.080251  | 0.001658  |
| 4  | 6  | 0 | 4.420462  | 1.179204  | 0.010277  |
| 5  | 6  | 0 | 3.051945  | 0.959852  | 0.002993  |
| 6  | 6  | 0 | 2.553949  | -0.357001 | -0.012616 |
| 7  | 1  | 0 | 3.045438  | -2.463710 | -0.033496 |
| 8  | 1  | 0 | 5.502444  | -2.070841 | -0.020765 |
| 9  | 1  | 0 | 4.820200  | 2.187399  | 0.022467  |
| 10 | 1  | 0 | 2.353009  | 1.789606  | 0.009149  |
| 11 | 6  | 0 | 1.118774  | -0.607571 | -0.020440 |
| 12 | 8  | 0 | 0.280949  | 0.302936  | -0.015369 |
| 13 | 1  | 0 | 0.790675  | -1.657267 | -0.033467 |
| 14 | 50 | 0 | -2.043831 | 0.062217  | 0.001245  |
| 15 | 17 | 0 | -1.573274 | -0.970452 | 2.056173  |
| 16 | 17 | 0 | -4.387388 | -0.141966 | 0.025249  |
| 17 | 17 | 0 | -1.865698 | 2.378765  | -0.181645 |
| 18 | 17 | 0 | -1.593155 | -1.267039 | -1.883306 |
| 19 | 6  | 0 | 6.719553  | 0.307234  | 0.008968  |
| 20 | 7  | 0 | 7.867624  | 0.491360  | 0.014871  |

#### **Frequency Data:**

Temperature 298.150 Kelvin. Pressure 1.00000 Atm.  
 Zero-point correction= 0.115075 (Hartree/Particle)  
 Thermal correction to Energy= 0.132669  
 Thermal correction to Enthalpy= 0.133613  
 Thermal correction to Gibbs Free Energy= 0.063292  
 Sum of electronic and zero-point Energies= -2282.011155  
 Sum of electronic and thermal Energies= -2281.993562  
 Sum of electronic and thermal Enthalpies= -2281.992618  
 Sum of electronic and thermal Free Energies= -2282.062938

### **(4-methoxy benzaldehyde)SnCl<sub>4</sub>(anisole) TS**

Cartesian Coordinates (Angstroms):

|   |   |   |          |           |          |
|---|---|---|----------|-----------|----------|
| 1 | 6 | 0 | 3.029574 | -0.059442 | 1.461009 |
| 2 | 6 | 0 | 4.347218 | -0.473017 | 1.339329 |

|    |    |   |           |           |           |
|----|----|---|-----------|-----------|-----------|
| 3  | 6  | 0 | 4.788383  | -1.081195 | 0.151252  |
| 4  | 6  | 0 | 3.888225  | -1.266537 | -0.904988 |
| 5  | 6  | 0 | 2.563908  | -0.839853 | -0.770466 |
| 6  | 6  | 0 | 2.118343  | -0.232107 | 0.405330  |
| 7  | 1  | 0 | 2.698745  | 0.393816  | 2.392899  |
| 8  | 1  | 0 | 5.054614  | -0.352651 | 2.153565  |
| 9  | 1  | 0 | 4.198038  | -1.747668 | -1.825475 |
| 10 | 1  | 0 | 1.862453  | -1.005447 | -1.581481 |
| 11 | 6  | 0 | 0.704285  | 0.258724  | 0.554778  |
| 12 | 8  | 0 | -0.198643 | -0.334887 | -0.428422 |
| 13 | 1  | 0 | 0.347403  | 0.079665  | 1.572575  |
| 14 | 6  | 0 | 0.449759  | 1.747742  | 0.146892  |
| 15 | 6  | 0 | -0.617841 | 2.469922  | 0.789750  |
| 16 | 6  | 0 | 1.416754  | 2.527793  | -0.584106 |
| 17 | 6  | 0 | -0.799115 | 3.821488  | 0.594290  |
| 18 | 1  | 0 | -1.341004 | 1.913451  | 1.381698  |
| 19 | 6  | 0 | 1.234752  | 3.871396  | -0.786697 |
| 20 | 1  | 0 | 2.278874  | 2.021209  | -1.006100 |
| 21 | 6  | 0 | 0.125597  | 4.534900  | -0.201775 |
| 22 | 1  | 0 | -1.644904 | 4.321270  | 1.050053  |
| 23 | 1  | 0 | 1.930717  | 4.461166  | -1.373787 |
| 24 | 1  | 0 | -0.232971 | 1.113080  | -0.721032 |
| 25 | 8  | 0 | 0.043010  | 5.839734  | -0.460765 |
| 26 | 6  | 0 | -1.041724 | 6.610051  | 0.076340  |
| 27 | 1  | 0 | -2.002850 | 6.230974  | -0.285672 |
| 28 | 1  | 0 | -0.882734 | 7.623994  | -0.289248 |
| 29 | 1  | 0 | -1.019707 | 6.602782  | 1.170920  |
| 30 | 50 | 0 | -1.891721 | -1.386049 | -0.065416 |
| 31 | 17 | 0 | -2.623114 | -0.267753 | -2.085571 |
| 32 | 17 | 0 | -0.762280 | -2.360204 | 1.849112  |
| 33 | 17 | 0 | -3.373254 | -0.132885 | 1.320471  |
| 34 | 17 | 0 | -2.490150 | -3.507764 | -0.898417 |
| 35 | 8  | 0 | 6.096597  | -1.454376 | 0.131707  |
| 36 | 6  | 0 | 6.594136  | -2.112716 | -1.024404 |
| 37 | 1  | 0 | 6.526633  | -1.471646 | -1.913205 |
| 38 | 1  | 0 | 7.642837  | -2.330404 | -0.815528 |
| 39 | 1  | 0 | 6.058205  | -3.051495 | -1.213871 |

**Frequency Data:****NImag:** 1 (-1103.9)

Temperature 298.150 Kelvin. Pressure 1.00000 Atm.

1 imaginary frequencies ignored.

|                                              |                             |
|----------------------------------------------|-----------------------------|
| Zero-point correction=                       | 0.280986 (Hartree/Particle) |
| Thermal correction to Energy=                | 0.306628                    |
| Thermal correction to Enthalpy=              | 0.307573                    |
| Thermal correction to Gibbs Free Energy=     | 0.219551                    |
| Sum of electronic and zero-point Energies=   | -2650.826831                |
| Sum of electronic and thermal Energies=      | -2650.801189                |
| Sum of electronic and thermal Enthalpies=    | -2650.800244                |
| Sum of electronic and thermal Free Energies= | -2650.888266                |



**(4-methyl benzaldehyde)SnCl<sub>4</sub>(anisole) TS**

Cartesian Coordinates (Angstroms):

|    |    |   |           |           |           |
|----|----|---|-----------|-----------|-----------|
| 1  | 6  | 0 | -1.918129 | 2.680187  | 1.260096  |
| 2  | 6  | 0 | -2.410357 | 3.966291  | 1.055071  |
| 3  | 6  | 0 | -2.221629 | 4.627216  | -0.168130 |
| 4  | 6  | 0 | -1.528409 | 3.951256  | -1.179944 |
| 5  | 6  | 0 | -1.035037 | 2.660647  | -0.983578 |
| 6  | 6  | 0 | -1.227136 | 2.011479  | 0.240969  |
| 7  | 1  | 0 | -2.063831 | 2.196158  | 2.223515  |
| 8  | 1  | 0 | -2.938488 | 4.471437  | 1.860492  |
| 9  | 1  | 0 | -1.362218 | 4.444362  | -2.134857 |
| 10 | 1  | 0 | -0.478815 | 2.161435  | -1.770240 |
| 11 | 6  | 0 | -0.734667 | 0.606890  | 0.473015  |
| 12 | 8  | 0 | 0.308548  | 0.218683  | -0.469875 |
| 13 | 6  | 0 | -2.717976 | 6.039401  | -0.371329 |
| 14 | 1  | 0 | -1.987533 | 6.770481  | -0.000215 |
| 15 | 1  | 0 | -3.655698 | 6.217807  | 0.166206  |
| 16 | 1  | 0 | -2.886178 | 6.257012  | -1.431148 |
| 17 | 1  | 0 | -0.394414 | 0.494401  | 1.505870  |
| 18 | 6  | 0 | -1.735080 | -0.535691 | 0.104653  |
| 19 | 6  | 0 | -1.646045 | -1.786880 | 0.813869  |
| 20 | 6  | 0 | -2.936911 | -0.301461 | -0.656950 |
| 21 | 6  | 0 | -2.590351 | -2.777367 | 0.657177  |
| 22 | 1  | 0 | -0.766339 | -1.975822 | 1.425191  |
| 23 | 6  | 0 | -3.874250 | -1.288075 | -0.820535 |
| 24 | 1  | 0 | -3.070038 | 0.664785  | -1.133087 |
| 25 | 6  | 0 | -3.714238 | -2.536803 | -0.166091 |
| 26 | 1  | 0 | -2.462527 | -3.726387 | 1.163202  |
| 27 | 1  | 0 | -4.760371 | -1.140490 | -1.428683 |
| 28 | 1  | 0 | -0.801968 | -0.726689 | -0.737947 |
| 29 | 8  | 0 | -4.683195 | -3.423264 | -0.390440 |
| 30 | 6  | 0 | -4.625223 | -4.720268 | 0.220720  |
| 31 | 1  | 0 | -3.728890 | -5.260351 | -0.100643 |
| 32 | 1  | 0 | -5.516040 | -5.241866 | -0.127614 |
| 33 | 1  | 0 | -4.646940 | -4.636874 | 1.312075  |
| 34 | 50 | 0 | 2.191425  | -0.398176 | -0.047895 |
| 35 | 17 | 0 | 1.820836  | -1.769790 | -2.008451 |
| 36 | 17 | 0 | 2.198097  | 1.199171  | 1.779279  |
| 37 | 17 | 0 | 2.120556  | -2.260660 | 1.439751  |
| 38 | 17 | 0 | 4.239266  | 0.419229  | -0.880517 |

**Frequency Data:****NImag:** 1 ( -1093.4 )

Temperature 298.150 Kelvin. Pressure 1.00000 Atm.

1 imaginary frequencies ignored.

|                                            |                             |
|--------------------------------------------|-----------------------------|
| Zero-point correction=                     | 0.275677 (Hartree/Particle) |
| Thermal correction to Energy=              | 0.300647                    |
| Thermal correction to Enthalpy=            | 0.301591                    |
| Thermal correction to Gibbs Free Energy=   | 0.214462                    |
| Sum of electronic and zero-point Energies= | -2575.627816                |

Sum of electronic and thermal Energies= -2575.602846  
 Sum of electronic and thermal Enthalpies= -2575.601902  
 Sum of electronic and thermal Free Energies= -2575.689031

**(4-chloro benzaldehyde)SnCl<sub>4</sub>(anisole) TS**

Cartesian Coordinates (Angstroms):

|    |    |   |           |           |           |
|----|----|---|-----------|-----------|-----------|
| 1  | 6  | 0 | 3.039083  | -0.382820 | 1.308491  |
| 2  | 6  | 0 | 4.311419  | -0.921992 | 1.133993  |
| 3  | 6  | 0 | 4.627506  | -1.536080 | -0.079450 |
| 4  | 6  | 0 | 3.689730  | -1.622460 | -1.107332 |
| 5  | 6  | 0 | 2.419657  | -1.074817 | -0.920200 |
| 6  | 6  | 0 | 2.084626  | -0.447361 | 0.284736  |
| 7  | 1  | 0 | 2.786450  | 0.081854  | 2.258728  |
| 8  | 1  | 0 | 5.046812  | -0.878382 | 1.930020  |
| 9  | 1  | 0 | 3.945894  | -2.117834 | -2.037655 |
| 10 | 1  | 0 | 1.674065  | -1.155275 | -1.703845 |
| 11 | 6  | 0 | 0.727404  | 0.176997  | 0.491128  |
| 12 | 8  | 0 | -0.256814 | -0.303701 | -0.469151 |
| 13 | 1  | 0 | 0.391573  | 0.009093  | 1.518171  |
| 14 | 6  | 0 | 0.610706  | 1.688832  | 0.121066  |
| 15 | 6  | 0 | -0.351572 | 2.499387  | 0.823652  |
| 16 | 6  | 0 | 1.616756  | 2.384569  | -0.643497 |
| 17 | 6  | 0 | -0.409653 | 3.864749  | 0.653468  |
| 18 | 1  | 0 | -1.097627 | 2.002753  | 1.440010  |
| 19 | 6  | 0 | 1.557859  | 3.742555  | -0.818248 |
| 20 | 1  | 0 | 2.404332  | 1.806932  | -1.116710 |
| 21 | 6  | 0 | 0.545284  | 4.499810  | -0.173761 |
| 22 | 1  | 0 | -1.182560 | 4.435946  | 1.152765  |
| 23 | 1  | 0 | 2.280227  | 4.272503  | -1.429879 |
| 24 | 1  | 0 | -0.170833 | 1.153700  | -0.729958 |
| 25 | 8  | 0 | 0.579524  | 5.809315  | -0.411376 |
| 26 | 6  | 0 | -0.398012 | 6.675118  | 0.184972  |
| 27 | 1  | 0 | -1.406825 | 6.402909  | -0.141335 |
| 28 | 1  | 0 | -0.151104 | 7.674551  | -0.171352 |
| 29 | 1  | 0 | -0.330517 | 6.643110  | 1.277114  |
| 30 | 50 | 0 | -2.021122 | -1.222212 | -0.054036 |
| 31 | 17 | 0 | -2.744653 | 0.056145  | -1.977761 |
| 32 | 17 | 0 | -0.850235 | -2.395638 | 1.717099  |
| 33 | 17 | 0 | -3.266772 | 0.103897  | 1.484343  |
| 34 | 17 | 0 | -2.904867 | -3.226803 | -0.918222 |
| 35 | 17 | 0 | 6.228867  | -2.216724 | -0.308647 |

**Frequency Data:**

**NImag:** 1 (-1080.2)

Temperature 298.150 Kelvin. Pressure 1.00000 Atm.

1 imaginary frequencies ignored.

Zero-point correction= 0.238609 (Hartree/Particle)  
 Thermal correction to Energy= 0.262854  
 Thermal correction to Enthalpy= 0.263799  
 Thermal correction to Gibbs Free Energy= 0.178803

Sum of electronic and zero-point Energies= -2995.938894  
 Sum of electronic and thermal Energies= -2995.914649  
 Sum of electronic and thermal Enthalpies= -2995.913705  
 Sum of electronic and thermal Free Energies= -2995.998700

**(4-trifluoromethyl benzaldehyde)SnCl<sub>4</sub>(anisole) TS**

Cartesian Coordinates (Angstroms):

|    |    |   |           |           |           |
|----|----|---|-----------|-----------|-----------|
| 1  | 6  | 0 | -2.598472 | 0.499612  | -1.338525 |
| 2  | 6  | 0 | -3.964601 | 0.294011  | -1.174162 |
| 3  | 6  | 0 | -4.445857 | -0.268828 | 0.012900  |
| 4  | 6  | 0 | -3.555768 | -0.628310 | 1.026140  |
| 5  | 6  | 0 | -2.186559 | -0.417702 | 0.859687  |
| 6  | 6  | 0 | -1.698912 | 0.150042  | -0.321871 |
| 7  | 1  | 0 | -2.228785 | 0.926565  | -2.267745 |
| 8  | 1  | 0 | -4.657198 | 0.567503  | -1.963372 |
| 9  | 1  | 0 | -3.929982 | -1.070483 | 1.943267  |
| 10 | 1  | 0 | -1.488506 | -0.710765 | 1.635951  |
| 11 | 6  | 0 | -0.224198 | 0.412884  | -0.510983 |
| 12 | 8  | 0 | 0.596564  | -0.302625 | 0.453365  |
| 13 | 6  | 0 | -5.920257 | -0.536050 | 0.165130  |
| 14 | 1  | 0 | 0.067114  | 0.170164  | -1.536556 |
| 15 | 6  | 0 | 0.262140  | 1.844645  | -0.129838 |
| 16 | 6  | 0 | 1.401231  | 2.393521  | -0.821727 |
| 17 | 6  | 0 | -0.544760 | 2.764887  | 0.634266  |
| 18 | 6  | 0 | 1.795584  | 3.700636  | -0.642276 |
| 19 | 1  | 0 | 2.005183  | 1.728688  | -1.435292 |
| 20 | 6  | 0 | -0.151079 | 4.064375  | 0.818273  |
| 21 | 1  | 0 | -1.453827 | 2.398726  | 1.100617  |
| 22 | 6  | 0 | 1.022536  | 4.549185  | 0.184055  |
| 23 | 1  | 0 | 2.689862  | 4.064379  | -1.133252 |
| 24 | 1  | 0 | -0.722528 | 4.754059  | 1.430269  |
| 25 | 1  | 0 | 0.879627  | 1.128881  | 0.722459  |
| 26 | 8  | 0 | 1.313882  | 5.823980  | 0.431462  |
| 27 | 6  | 0 | 2.481154  | 6.423019  | -0.151564 |
| 28 | 1  | 0 | 3.386799  | 5.900643  | 0.172515  |
| 29 | 1  | 0 | 2.492324  | 7.447663  | 0.218193  |
| 30 | 1  | 0 | 2.412619  | 6.423067  | -1.244076 |
| 31 | 50 | 0 | 2.061250  | -1.658124 | 0.055378  |
| 32 | 17 | 0 | 3.050068  | -0.643373 | 2.015478  |
| 33 | 17 | 0 | 0.644135  | -2.472600 | -1.736918 |
| 34 | 17 | 0 | 3.622221  | -0.670359 | -1.447757 |
| 35 | 17 | 0 | 2.402494  | -3.836661 | 0.883919  |
| 36 | 9  | 0 | -6.662079 | 0.418918  | -0.441248 |
| 37 | 9  | 0 | -6.273497 | -1.716731 | -0.387948 |
| 38 | 9  | 0 | -6.292584 | -0.577562 | 1.462773  |

**Frequency Data:**

**NImag:** 1 (-1079.6 )

Temperature 298.150 Kelvin. Pressure 1.00000 Atm.

1 imaginary frequencies ignored.

|                                              |                             |
|----------------------------------------------|-----------------------------|
| Zero-point correction=                       | 0.253017 (Hartree/Particle) |
| Thermal correction to Energy=                | 0.279725                    |
| Thermal correction to Enthalpy=              | 0.280669                    |
| Thermal correction to Gibbs Free Energy=     | 0.188546                    |
| Sum of electronic and zero-point Energies=   | -2873.365915                |
| Sum of electronic and thermal Energies=      | -2873.339207                |
| Sum of electronic and thermal Enthalpies=    | -2873.338263                |
| Sum of electronic and thermal Free Energies= | -2873.430385                |

### **(4-cyano benzaldehyde)SnCl<sub>4</sub>(anisole) TS**

Cartesian Coordinates (Angstroms):

|    |    |   |           |           |           |
|----|----|---|-----------|-----------|-----------|
| 1  | 6  | 0 | 3.024140  | -0.906180 | 1.277392  |
| 2  | 6  | 0 | 4.185652  | -1.649398 | 1.104725  |
| 3  | 6  | 0 | 4.389659  | -2.357005 | -0.093317 |
| 4  | 6  | 0 | 3.414457  | -2.315286 | -1.102449 |
| 5  | 6  | 0 | 2.254956  | -1.564845 | -0.920007 |
| 6  | 6  | 0 | 2.053460  | -0.851480 | 0.266988  |
| 7  | 1  | 0 | 2.865693  | -0.372165 | 2.211094  |
| 8  | 1  | 0 | 4.933007  | -1.695192 | 1.889987  |
| 9  | 1  | 0 | 3.567191  | -2.873915 | -2.020060 |
| 10 | 1  | 0 | 1.489966  | -1.544640 | -1.688126 |
| 11 | 6  | 0 | 0.819606  | -0.005409 | 0.471487  |
| 12 | 8  | 0 | -0.228998 | -0.302475 | -0.491639 |
| 13 | 1  | 0 | 0.460062  | -0.122696 | 1.497790  |
| 14 | 6  | 0 | 0.969381  | 1.504291  | 0.113071  |
| 15 | 6  | 0 | 0.170071  | 2.466623  | 0.828639  |
| 16 | 6  | 0 | 2.074425  | 2.017345  | -0.660077 |
| 17 | 6  | 0 | 0.346960  | 3.821656  | 0.659352  |
| 18 | 1  | 0 | -0.643658 | 2.104408  | 1.452918  |
| 19 | 6  | 0 | 2.249858  | 3.365370  | -0.832079 |
| 20 | 1  | 0 | 2.744941  | 1.314718  | -1.144528 |
| 21 | 6  | 0 | 1.388396  | 4.284703  | -0.177915 |
| 22 | 1  | 0 | -0.310494 | 4.516582  | 1.167080  |
| 23 | 1  | 0 | 3.046741  | 3.763917  | -1.450835 |
| 24 | 1  | 0 | 0.098400  | 1.121457  | -0.737423 |
| 25 | 8  | 0 | 1.643173  | 5.568400  | -0.417646 |
| 26 | 6  | 0 | 0.829802  | 6.588837  | 0.181945  |
| 27 | 1  | 0 | -0.214224 | 6.483105  | -0.129349 |
| 28 | 1  | 0 | 1.233226  | 7.530718  | -0.187861 |
| 29 | 1  | 0 | 0.906772  | 6.554590  | 1.273344  |
| 30 | 50 | 0 | -2.126118 | -0.898600 | -0.053164 |
| 31 | 17 | 0 | -2.645740 | 0.586732  | -1.892440 |
| 32 | 17 | 0 | -1.131569 | -2.356150 | 1.609565  |
| 33 | 17 | 0 | -3.040312 | 0.564183  | 1.589063  |
| 34 | 17 | 0 | -3.403005 | -2.652843 | -0.964036 |
| 35 | 6  | 0 | 5.590958  | -3.117785 | -0.280885 |
| 36 | 7  | 0 | 6.570688  | -3.725658 | -0.434195 |

**Frequency Data:**

**NImag:** 1 (-1110.3)

Temperature 298.150 Kelvin. Pressure 1.00000 Atm.

1 imaginary frequencies ignored.  
 Zero-point correction= 0.246714 (Hartree/Particle)  
 Thermal correction to Energy= 0.271580  
 Thermal correction to Enthalpy= 0.272524  
 Thermal correction to Gibbs Free Energy= 0.186172  
 Sum of electronic and zero-point Energies= -2628.577395  
 Sum of electronic and thermal Energies= -2628.552529  
 Sum of electronic and thermal Enthalpies= -2628.551585  
 Sum of electronic and thermal Free Energies= -2628.637937

### **Ethyl Glyoxalate**

Cartesian Coordinates (Angstroms):

|    |   |   |           |           |           |
|----|---|---|-----------|-----------|-----------|
| 1  | 6 | 0 | -0.626109 | 0.266837  | -0.000073 |
| 2  | 8 | 0 | -0.756158 | 1.466790  | 0.000112  |
| 3  | 8 | 0 | 0.539560  | -0.402786 | -0.000262 |
| 4  | 6 | 0 | 1.740790  | 0.411737  | -0.000176 |
| 5  | 1 | 0 | 1.717786  | 1.057408  | 0.883438  |
| 6  | 1 | 0 | 1.718142  | 1.057050  | -0.884066 |
| 7  | 6 | 0 | 2.932401  | -0.525111 | 0.000250  |
| 8  | 1 | 0 | 3.859403  | 0.058230  | 0.000060  |
| 9  | 1 | 0 | 2.928359  | -1.164560 | 0.888600  |
| 10 | 1 | 0 | 2.928456  | -1.165272 | -0.887588 |
| 11 | 6 | 0 | -1.787249 | -0.739566 | -0.000038 |
| 12 | 8 | 0 | -2.936661 | -0.379070 | 0.000146  |
| 13 | 1 | 0 | -1.485083 | -1.805708 | -0.000189 |

### **Frequency Data:**

Temperature 298.150 Kelvin. Pressure 1.00000 Atm.  
 Zero-point correction= 0.099948 (Hartree/Particle)  
 Thermal correction to Energy= 0.107689  
 Thermal correction to Enthalpy= 0.108633  
 Thermal correction to Gibbs Free Energy= 0.067154  
 Sum of electronic and zero-point Energies= -381.592786  
 Sum of electronic and thermal Energies= -381.585046  
 Sum of electronic and thermal Enthalpies= -381.584101  
 Sum of electronic and thermal Free Energies= -381.625580

### **(Ethylglyoxalate)SnCl<sub>4</sub> Intermediate**

Cartesian Coordinates (Angstroms):

|    |    |   |           |           |           |
|----|----|---|-----------|-----------|-----------|
| 1  | 6  | 0 | 1.727034  | 1.155088  | 0.000720  |
| 2  | 8  | 0 | 0.996122  | 0.180520  | 0.001717  |
| 3  | 1  | 0 | 1.343984  | 2.185620  | 0.000358  |
| 4  | 50 | 0 | -1.463149 | -0.086992 | -0.000067 |
| 5  | 17 | 0 | -1.412654 | 2.253180  | 0.000853  |
| 6  | 17 | 0 | -3.775435 | -0.457576 | -0.001837 |
| 7  | 17 | 0 | -0.849186 | -1.103179 | -2.001778 |
| 8  | 17 | 0 | -0.851934 | -1.103706 | 2.002247  |
| 9  | 6  | 0 | 3.248531  | 1.048683  | -0.000221 |
| 10 | 8  | 0 | 3.921813  | 2.057056  | -0.001617 |
| 11 | 8  | 0 | 3.671274  | -0.206749 | 0.000852  |
| 12 | 6  | 0 | 5.116823  | -0.397179 | 0.000272  |

|    |   |   |          |           |           |
|----|---|---|----------|-----------|-----------|
| 13 | 6 | 0 | 5.377133 | -1.889507 | -0.000073 |
| 14 | 1 | 0 | 5.523855 | 0.100759  | 0.885554  |
| 15 | 1 | 0 | 5.523120 | 0.101121  | -0.885151 |
| 16 | 1 | 0 | 6.457264 | -2.070384 | -0.000445 |
| 17 | 1 | 0 | 4.947786 | -2.362582 | 0.888237  |
| 18 | 1 | 0 | 4.947201 | -2.362283 | -0.888257 |

**Frequency Data:**

|                                              |                 |          |              |                    |
|----------------------------------------------|-----------------|----------|--------------|--------------------|
| Temperature                                  | 298.150 Kelvin. | Pressure | 1.00000      | Atm.               |
| Zero-point correction=                       |                 |          | 0.106285     | (Hartree/Particle) |
| Thermal correction to Energy=                |                 |          | 0.123527     |                    |
| Thermal correction to Enthalpy=              |                 |          | 0.124472     |                    |
| Thermal correction to Gibbs Free Energy=     |                 |          | 0.055349     |                    |
| Sum of electronic and zero-point Energies=   |                 |          | -2225.897780 |                    |
| Sum of electronic and thermal Energies=      |                 |          | -2225.880537 |                    |
| Sum of electronic and thermal Enthalpies=    |                 |          | -2225.879593 |                    |
| Sum of electronic and thermal Free Energies= |                 |          | -2225.948716 |                    |

**(Ethylglyoxalate)SnCl<sub>4</sub>(Anisole) TS**

Cartesian Coordinates (Angstroms):

|    |    |   |           |           |           |
|----|----|---|-----------|-----------|-----------|
| 1  | 6  | 0 | 0.620737  | 2.279253  | 0.525213  |
| 2  | 6  | 0 | 0.669498  | 0.875526  | -0.088110 |
| 3  | 8  | 0 | -0.134278 | -0.053103 | 0.661480  |
| 4  | 1  | 0 | 0.381907  | 0.927944  | -1.141603 |
| 5  | 6  | 0 | 2.024254  | 0.149165  | 0.064601  |
| 6  | 6  | 0 | 2.580395  | -0.562934 | -1.059942 |
| 7  | 6  | 0 | 2.906451  | 0.419379  | 1.181724  |
| 8  | 6  | 0 | 3.843006  | -1.105990 | -1.010616 |
| 9  | 1  | 0 | 1.948241  | -0.727766 | -1.927690 |
| 10 | 6  | 0 | 4.164780  | -0.121655 | 1.225513  |
| 11 | 1  | 0 | 2.518061  | 1.014877  | 2.001600  |
| 12 | 6  | 0 | 4.648320  | -0.888565 | 0.135000  |
| 13 | 1  | 0 | 4.214033  | -1.685696 | -1.846958 |
| 14 | 1  | 0 | 4.821107  | 0.027859  | 2.076158  |
| 15 | 1  | 0 | 1.247934  | -0.688712 | 0.587441  |
| 16 | 8  | 0 | 5.880398  | -1.369407 | 0.282818  |
| 17 | 6  | 0 | 6.475851  | -2.166140 | -0.752121 |
| 18 | 1  | 0 | 5.888947  | -3.073075 | -0.928959 |
| 19 | 1  | 0 | 7.463126  | -2.432290 | -0.376308 |
| 20 | 1  | 0 | 6.573984  | -1.590257 | -1.677824 |
| 21 | 50 | 0 | -1.969144 | -0.790486 | 0.056626  |
| 22 | 17 | 0 | -1.787994 | -2.104458 | 2.008075  |
| 23 | 17 | 0 | -2.716802 | 1.465560  | -0.001780 |
| 24 | 17 | 0 | -0.851117 | -1.557547 | -1.931760 |
| 25 | 17 | 0 | -4.076586 | -1.692426 | -0.602654 |
| 26 | 8  | 0 | 0.803761  | 2.517682  | 1.700245  |
| 27 | 8  | 0 | 0.376370  | 3.196078  | -0.416412 |
| 28 | 6  | 0 | 0.232777  | 4.565871  | 0.044613  |
| 29 | 1  | 0 | 1.170885  | 4.872792  | 0.518397  |
| 30 | 1  | 0 | -0.552775 | 4.586873  | 0.805036  |
| 31 | 6  | 0 | -0.111939 | 5.416462  | -1.162265 |
| 32 | 1  | 0 | -0.234973 | 6.460188  | -0.853490 |

|    |   |   |           |          |           |
|----|---|---|-----------|----------|-----------|
| 33 | 1 | 0 | 0.681018  | 5.371560 | -1.915938 |
| 34 | 1 | 0 | -1.046574 | 5.078598 | -1.619846 |

**Frequency Data:****NImag:** 1 (-956.3)

Temperature 298.150 Kelvin. Pressure 1.00000 Atm.

1 imaginary frequencies ignored.

|                                              |                             |
|----------------------------------------------|-----------------------------|
| Zero-point correction=                       | 0.238993 (Hartree/Particle) |
| Thermal correction to Energy=                | 0.263165                    |
| Thermal correction to Enthalpy=              | 0.264109                    |
| Thermal correction to Gibbs Free Energy=     | 0.179971                    |
| Sum of electronic and zero-point Energies=   | -2572.485315                |
| Sum of electronic and thermal Energies=      | -2572.461143                |
| Sum of electronic and thermal Enthalpies=    | -2572.460199                |
| Sum of electronic and thermal Free Energies= | -2572.544336                |

**PhSnCl<sub>3</sub>**

Cartesian Coordinates (Angstroms):

|    |    |   |           |           |           |
|----|----|---|-----------|-----------|-----------|
| 1  | 50 | 0 | -0.714280 | 0.000025  | -0.004653 |
| 2  | 17 | 0 | -1.661056 | -0.005175 | 2.130387  |
| 3  | 17 | 0 | -1.550639 | 1.895982  | -1.076372 |
| 4  | 17 | 0 | -1.551482 | -1.890370 | -1.085504 |
| 5  | 6  | 0 | 1.388176  | -0.000132 | -0.003727 |
| 6  | 6  | 0 | 2.087627  | -1.215771 | 0.006489  |
| 7  | 6  | 0 | 2.087749  | 1.215428  | 0.006341  |
| 8  | 6  | 0 | 3.483436  | -1.210993 | 0.029696  |
| 9  | 1  | 0 | 1.556901  | -2.164049 | -0.013094 |
| 10 | 6  | 0 | 3.483568  | 1.210501  | 0.029553  |
| 11 | 1  | 0 | 1.557084  | 2.163733  | -0.013337 |
| 12 | 6  | 0 | 4.179148  | -0.000278 | 0.042530  |
| 13 | 1  | 0 | 4.025031  | -2.152656 | 0.034793  |
| 14 | 1  | 0 | 4.025260  | 2.152109  | 0.034541  |
| 15 | 1  | 0 | 5.265482  | -0.000337 | 0.059771  |

**Frequency Data:**

Temperature 298.150 Kelvin. Pressure 1.00000 Atm.

|                                              |                             |
|----------------------------------------------|-----------------------------|
| Zero-point correction=                       | 0.094090 (Hartree/Particle) |
| Thermal correction to Energy=                | 0.105646                    |
| Thermal correction to Enthalpy=              | 0.106590                    |
| Thermal correction to Gibbs Free Energy=     | 0.052661                    |
| Sum of electronic and zero-point Energies=   | -1615.634211                |
| Sum of electronic and thermal Energies=      | -1615.622655                |
| Sum of electronic and thermal Enthalpies=    | -1615.621711                |
| Sum of electronic and thermal Free Energies= | -1615.675640                |

**PhSnCl<sub>3</sub>(4-Methyl Benzaldehyde) Intermediate**

Cartesian Coordinates (Angstroms):

|   |   |   |           |           |           |
|---|---|---|-----------|-----------|-----------|
| 1 | 6 | 0 | -4.417514 | -0.611002 | 1.268433  |
| 2 | 6 | 0 | -5.777021 | -0.483912 | 1.006372  |
| 3 | 6 | 0 | -6.224590 | 0.087597  | -0.194603 |

|    |    |   |           |           |           |
|----|----|---|-----------|-----------|-----------|
| 4  | 6  | 0 | -5.270701 | 0.525669  | -1.134298 |
| 5  | 6  | 0 | -3.913289 | 0.405626  | -0.883275 |
| 6  | 6  | 0 | -3.473435 | -0.166548 | 0.326928  |
| 7  | 1  | 0 | -4.079509 | -1.056230 | 2.201114  |
| 8  | 1  | 0 | -6.503296 | -0.831273 | 1.736014  |
| 9  | 1  | 0 | -5.608581 | 0.963173  | -2.070151 |
| 10 | 1  | 0 | -3.176046 | 0.742481  | -1.604766 |
| 11 | 6  | 0 | -2.061117 | -0.308683 | 0.624176  |
| 12 | 8  | 0 | -1.167812 | 0.066251  | -0.151110 |
| 13 | 1  | 0 | -1.783699 | -0.767498 | 1.583128  |
| 14 | 50 | 0 | 1.135838  | 0.015126  | -0.030569 |
| 15 | 17 | 0 | 0.770679  | -0.950253 | 2.126946  |
| 16 | 17 | 0 | 0.702243  | -1.453000 | -1.849298 |
| 17 | 17 | 0 | 0.692661  | 2.347181  | -0.155764 |
| 18 | 6  | 0 | 3.271437  | 0.041638  | -0.081164 |
| 19 | 6  | 0 | 3.976835  | 1.152809  | 0.400057  |
| 20 | 6  | 0 | 3.976939  | -1.075726 | -0.548467 |
| 21 | 6  | 0 | 5.373795  | 1.145185  | 0.411401  |
| 22 | 1  | 0 | 3.445603  | 2.031445  | 0.754792  |
| 23 | 6  | 0 | 5.373810  | -1.078867 | -0.535192 |
| 24 | 1  | 0 | 3.446192  | -1.940674 | -0.936146 |
| 25 | 6  | 0 | 6.072417  | 0.030241  | -0.054888 |
| 26 | 1  | 0 | 5.914068  | 2.012501  | 0.781937  |
| 27 | 1  | 0 | 5.913960  | -1.947308 | -0.903204 |
| 28 | 1  | 0 | 7.159304  | 0.026681  | -0.046281 |
| 29 | 6  | 0 | -7.697721 | 0.253951  | -0.471342 |
| 30 | 1  | 0 | -8.305524 | -0.378744 | 0.181369  |
| 31 | 1  | 0 | -7.938848 | 0.009993  | -1.511248 |
| 32 | 1  | 0 | -8.007009 | 1.294508  | -0.306110 |

**Frequency Data:**

Temperature 298.150 Kelvin. Pressure 1.00000 Atm.

**NImag:** 1 (-18.4 )

1 imaginary frequencies ignored.

|                                              |                             |
|----------------------------------------------|-----------------------------|
| Zero-point correction=                       | 0.233651 (Hartree/Particle) |
| Thermal correction to Energy=                | 0.254178                    |
| Thermal correction to Enthalpy=              | 0.255122                    |
| Thermal correction to Gibbs Free Energy=     | 0.178632                    |
| Sum of electronic and zero-point Energies=   | -2000.390711                |
| Sum of electronic and thermal Energies=      | -2000.370184                |
| Sum of electronic and thermal Enthalpies=    | -2000.369240                |
| Sum of electronic and thermal Free Energies= | -2000.445729                |

**(4-methyl benzaldehyde)PhSnCl<sub>3</sub>(anisole) TS**

Cartesian Coordinates (Angstroms):

|   |   |   |           |          |           |
|---|---|---|-----------|----------|-----------|
| 1 | 6 | 0 | -2.604970 | 2.733091 | 1.043970  |
| 2 | 6 | 0 | -3.078581 | 4.012288 | 0.764677  |
| 3 | 6 | 0 | -2.693643 | 4.687716 | -0.403245 |
| 4 | 6 | 0 | -1.821460 | 4.033795 | -1.282021 |
| 5 | 6 | 0 | -1.344520 | 2.750364 | -1.009735 |



|    |    |   |           |           |           |
|----|----|---|-----------|-----------|-----------|
| 6  | 6  | 0 | -1.734031 | 2.086295  | 0.157353  |
| 7  | 1  | 0 | -2.908700 | 2.236592  | 1.963286  |
| 8  | 1  | 0 | -3.749491 | 4.499875  | 1.468405  |
| 9  | 1  | 0 | -1.502734 | 4.537975  | -2.191580 |
| 10 | 1  | 0 | -0.651791 | 2.265188  | -1.689067 |
| 11 | 6  | 0 | -1.265293 | 0.685100  | 0.462383  |
| 12 | 8  | 0 | -0.118647 | 0.293638  | -0.341461 |
| 13 | 6  | 0 | -3.177278 | 6.091465  | -0.682910 |
| 14 | 1  | 0 | -2.528572 | 6.835925  | -0.202363 |
| 15 | 1  | 0 | -4.191357 | 6.251343  | -0.300323 |
| 16 | 1  | 0 | -3.180809 | 6.308320  | -1.756317 |
| 17 | 1  | 0 | -1.049528 | 0.591818  | 1.531136  |
| 18 | 6  | 0 | -2.223069 | -0.457905 | 0.000165  |
| 19 | 6  | 0 | -2.257896 | -1.688218 | 0.747833  |
| 20 | 6  | 0 | -3.292878 | -0.236847 | -0.942101 |
| 21 | 6  | 0 | -3.172779 | -2.679570 | 0.467321  |
| 22 | 1  | 0 | -1.488887 | -1.865525 | 1.496238  |
| 23 | 6  | 0 | -4.199203 | -1.224712 | -1.227639 |
| 24 | 1  | 0 | -3.341870 | 0.717345  | -1.457047 |
| 25 | 6  | 0 | -4.147900 | -2.458911 | -0.530051 |
| 26 | 1  | 0 | -3.130115 | -3.616147 | 1.009389  |
| 27 | 1  | 0 | -4.978029 | -1.089921 | -1.970740 |
| 28 | 1  | 0 | -1.199287 | -0.696033 | -0.712737 |
| 29 | 8  | 0 | -5.070578 | -3.353030 | -0.889351 |
| 30 | 6  | 0 | -5.097760 | -4.641976 | -0.261590 |
| 31 | 1  | 0 | -4.155701 | -5.174319 | -0.428054 |
| 32 | 1  | 0 | -5.915786 | -5.178655 | -0.741315 |
| 33 | 1  | 0 | -5.294584 | -4.549205 | 0.811553  |
| 34 | 50 | 0 | 1.604522  | -0.485373 | 0.390731  |
| 35 | 17 | 0 | 0.957997  | -2.334166 | -1.180620 |
| 36 | 17 | 0 | 1.600845  | 1.444207  | 1.934548  |
| 37 | 17 | 0 | 1.163766  | -1.955957 | 2.238084  |
| 38 | 6  | 0 | 3.541722  | -0.153938 | -0.443385 |
| 39 | 6  | 0 | 4.318228  | 0.931743  | -0.010107 |
| 40 | 6  | 0 | 4.055882  | -1.025231 | -1.415626 |
| 41 | 6  | 0 | 5.587943  | 1.145318  | -0.551560 |
| 42 | 1  | 0 | 3.935880  | 1.609601  | 0.745392  |
| 43 | 6  | 0 | 5.327847  | -0.807341 | -1.949695 |
| 44 | 1  | 0 | 3.465394  | -1.867368 | -1.760036 |
| 45 | 6  | 0 | 6.094249  | 0.277351  | -1.520233 |
| 46 | 1  | 0 | 6.180425  | 1.991071  | -0.212115 |
| 47 | 1  | 0 | 5.717445  | -1.487722 | -2.702611 |
| 48 | 1  | 0 | 7.083799  | 0.444908  | -1.938167 |

**Frequency Data:**

NImag: 1 ( -1035.7 )

Temperature 298.150 Kelvin. Pressure 1.00000 Atm.

1 imaginary frequencies ignored.

Zero-point correction= 0.365421 (Hartree/Particle)

Thermal correction to Energy= 0.393988

Thermal correction to Enthalpy= 0.394932

Thermal correction to Gibbs Free Energy= 0.300208  
 Sum of electronic and zero-point Energies= -2346.952815  
 Sum of electronic and thermal Energies= -2346.924249  
 Sum of electronic and thermal Enthalpies= -2346.923305  
 Sum of electronic and thermal Free Energies= -2347.018028

**Anisyl(p-tolyl)methanol**

Cartesian Coordinates (Angstroms):

|    |   |   |           |           |           |
|----|---|---|-----------|-----------|-----------|
| 1  | 6 | 0 | 3.811104  | 0.227436  | -0.744497 |
| 2  | 6 | 0 | 3.951159  | -0.997596 | -0.086823 |
| 3  | 6 | 0 | 2.931676  | -1.384587 | 0.796761  |
| 4  | 6 | 0 | 1.820758  | -0.575202 | 1.009972  |
| 5  | 6 | 0 | 1.688117  | 0.652895  | 0.346963  |
| 6  | 6 | 0 | 2.698343  | 1.046474  | -0.532262 |
| 7  | 6 | 0 | 0.467550  | 1.526191  | 0.611508  |
| 8  | 6 | 0 | -0.845084 | 0.835818  | 0.271812  |
| 9  | 6 | 0 | -1.796971 | 0.565411  | 1.253823  |
| 10 | 6 | 0 | -3.014118 | -0.054052 | 0.945612  |
| 11 | 6 | 0 | -3.289439 | -0.403059 | -0.379512 |
| 12 | 6 | 0 | -2.342585 | -0.127711 | -1.381427 |
| 13 | 6 | 0 | -1.140546 | 0.480453  | -1.056274 |
| 14 | 8 | 0 | 0.618891  | 2.735194  | -0.137253 |
| 15 | 1 | 0 | 4.585493  | 0.552718  | -1.436312 |
| 16 | 1 | 0 | 3.009703  | -2.334615 | 1.321867  |
| 17 | 1 | 0 | 1.040050  | -0.904758 | 1.692071  |
| 18 | 1 | 0 | 2.613240  | 1.996416  | -1.047240 |
| 19 | 1 | 0 | 0.450071  | 1.761932  | 1.689532  |
| 20 | 1 | 0 | -1.595154 | 0.841267  | 2.287082  |
| 21 | 1 | 0 | -3.728767 | -0.249031 | 1.737055  |
| 22 | 1 | 0 | -2.577116 | -0.406418 | -2.404224 |
| 23 | 1 | 0 | -0.411507 | 0.687637  | -1.834682 |
| 24 | 1 | 0 | -0.225208 | 3.208375  | -0.079007 |
| 25 | 8 | 0 | -4.437831 | -1.006923 | -0.803583 |
| 26 | 6 | 0 | -5.427583 | -1.319135 | 0.163116  |
| 27 | 1 | 0 | -6.242190 | -1.795927 | -0.385119 |
| 28 | 1 | 0 | -5.045497 | -2.014534 | 0.922334  |
| 29 | 1 | 0 | -5.805793 | -0.416146 | 0.660820  |
| 30 | 6 | 0 | 5.160821  | -1.876643 | -0.305224 |
| 31 | 1 | 0 | 4.871288  | -2.904346 | -0.556467 |
| 32 | 1 | 0 | 5.788176  | -1.497546 | -1.118338 |
| 33 | 1 | 0 | 5.785497  | -1.931353 | 0.596031  |

**Frequency Data:**

Temperature 298.150 Kelvin. Pressure 1.00000 Atm.  
 Zero-point correction= 0.274856 (Hartree/Particle)  
 Thermal correction to Energy= 0.290819  
 Thermal correction to Enthalpy= 0.291763  
 Thermal correction to Gibbs Free Energy= 0.229030  
 Sum of electronic and zero-point Energies= -731.388370  
 Sum of electronic and thermal Energies= -731.372408  
 Sum of electronic and thermal Enthalpies= -731.371463  
 Sum of electronic and thermal Free Energies= -731.434196

**(4-methyl benzaldehyde)AlCl<sub>3</sub> intermediate**

Cartesian Coordinates (Angstroms):

|    |    |   |           |           |           |
|----|----|---|-----------|-----------|-----------|
| 1  | 6  | 0 | -2.690336 | 1.387809  | -0.001127 |
| 2  | 6  | 0 | -4.053745 | 1.125095  | -0.002453 |
| 3  | 6  | 0 | -4.528721 | -0.196505 | -0.003099 |
| 4  | 6  | 0 | -3.597517 | -1.256693 | -0.004442 |
| 5  | 6  | 0 | -2.236629 | -1.010011 | -0.003069 |
| 6  | 6  | 0 | -1.767482 | 0.323048  | -0.001303 |
| 7  | 1  | 0 | -2.329768 | 2.413368  | -0.001002 |
| 8  | 1  | 0 | -4.762869 | 1.947728  | -0.003376 |
| 9  | 1  | 0 | -3.959388 | -2.281348 | -0.007102 |
| 10 | 1  | 0 | -1.518409 | -1.823345 | -0.004378 |
| 11 | 6  | 0 | -0.364996 | 0.625378  | -0.000632 |
| 12 | 8  | 0 | 0.522957  | -0.261475 | -0.000948 |
| 13 | 1  | 0 | -0.054429 | 1.678178  | 0.000443  |
| 14 | 17 | 0 | 2.656729  | 2.101067  | 0.001436  |
| 15 | 17 | 0 | 3.008550  | -1.056274 | 1.844727  |
| 16 | 17 | 0 | 3.011315  | -1.055035 | -1.843560 |
| 17 | 13 | 0 | 2.429912  | -0.076275 | 0.000462  |
| 18 | 6  | 0 | -6.006230 | -0.489428 | 0.005631  |
| 19 | 1  | 0 | -6.297999 | -0.981698 | 0.942073  |
| 20 | 1  | 0 | -6.601097 | 0.422238  | -0.095955 |
| 21 | 1  | 0 | -6.276717 | -1.169795 | -0.810406 |

**Frequency Data:**

Temperature 298.150 Kelvin. Pressure 1.00000 Atm.  
 Zero-point correction= 0.144816 (Hartree/Particle)  
 Thermal correction to Energy= 0.159775  
 Thermal correction to Enthalpy= 0.160719  
 Thermal correction to Gibbs Free Energy= 0.098498  
 Sum of electronic and zero-point Energies= -1767.545031  
 Sum of electronic and thermal Energies= -1767.530072  
 Sum of electronic and thermal Enthalpies= -1767.529128  
 Sum of electronic and thermal Free Energies= -1767.591349

**(4-methyl benzaldehyde)InCl<sub>3</sub> intermediate**

Cartesian Coordinates (Angstroms):

|   |   |   |           |           |           |
|---|---|---|-----------|-----------|-----------|
| 1 | 6 | 0 | -3.334791 | 1.356577  | -0.001536 |
| 2 | 6 | 0 | -4.700900 | 1.103170  | -0.002491 |
| 3 | 6 | 0 | -5.185388 | -0.214346 | -0.002969 |
| 4 | 6 | 0 | -4.261191 | -1.279942 | -0.004495 |
| 5 | 6 | 0 | -2.898188 | -1.041525 | -0.003433 |
| 6 | 6 | 0 | -2.419944 | 0.286857  | -0.001850 |
| 7 | 1 | 0 | -2.967701 | 2.379945  | -0.001571 |

|    |    |   |           |           |           |
|----|----|---|-----------|-----------|-----------|
| 8  | 1  | 0 | -5.404062 | 1.931049  | -0.003251 |
| 9  | 1  | 0 | -4.629374 | -2.302463 | -0.007029 |
| 10 | 1  | 0 | -2.185430 | -1.859744 | -0.004874 |
| 11 | 6  | 0 | -1.008816 | 0.577792  | -0.001494 |
| 12 | 8  | 0 | -0.128581 | -0.309622 | -0.001766 |
| 13 | 1  | 0 | -0.700689 | 1.633183  | -0.000741 |
| 14 | 17 | 0 | 2.017589  | 2.300376  | -0.002751 |
| 15 | 17 | 0 | 2.600926  | -1.065776 | 1.993032  |
| 16 | 17 | 0 | 2.606306  | -1.071876 | -1.987381 |
| 17 | 6  | 0 | -6.665346 | -0.497389 | 0.006039  |
| 18 | 1  | 0 | -6.961121 | -0.988194 | 0.941956  |
| 19 | 1  | 0 | -7.253678 | 0.418708  | -0.094614 |
| 20 | 1  | 0 | -6.941363 | -1.174506 | -0.810862 |
| 21 | 49 | 0 | 2.001990  | -0.042336 | 0.000391  |

**Frequency Data:**

Temperature 298.150 Kelvin. Pressure 1.00000 Atm.  
 Zero-point correction= 0.142922 (Hartree/Particle)  
 Thermal correction to Energy= 0.158851  
 Thermal correction to Enthalpy= 0.159795  
 Thermal correction to Gibbs Free Energy= 0.093942  
 Sum of electronic and zero-point Energies= -1767.405672  
 Sum of electronic and thermal Energies= -1767.389744  
 Sum of electronic and thermal Enthalpies= -1767.388799  
 Sum of electronic and thermal Free Energies= -1767.454652

**(4-methyl benzaldehyde)ZnCl<sub>2</sub> intermediate**

Cartesian Coordinates (Angstroms):

|    |    |   |           |           |           |
|----|----|---|-----------|-----------|-----------|
| 1  | 6  | 0 | -2.776687 | 0.053015  | 1.414978  |
| 2  | 6  | 0 | -4.142264 | 0.037614  | 1.158130  |
| 3  | 6  | 0 | -4.623385 | -0.016904 | -0.159707 |
| 4  | 6  | 0 | -3.695492 | -0.061608 | -1.218932 |
| 5  | 6  | 0 | -2.331787 | -0.046828 | -0.974992 |
| 6  | 6  | 0 | -1.858292 | 0.011153  | 0.351055  |
| 7  | 1  | 0 | -2.414071 | 0.093966  | 2.439415  |
| 8  | 1  | 0 | -4.847628 | 0.066538  | 1.984012  |
| 9  | 1  | 0 | -4.059033 | -0.110008 | -2.241982 |
| 10 | 1  | 0 | -1.615908 | -0.082444 | -1.789791 |
| 11 | 6  | 0 | -0.438652 | 0.024953  | 0.641463  |
| 12 | 8  | 0 | 0.445354  | -0.010963 | -0.226640 |
| 13 | 1  | 0 | -0.157680 | 0.071617  | 1.707200  |
| 14 | 17 | 0 | 3.192412  | 2.104321  | -0.040631 |
| 15 | 17 | 0 | 3.210477  | -2.098668 | 0.028750  |
| 16 | 30 | 0 | 2.532733  | -0.001877 | -0.104675 |
| 17 | 6  | 0 | -6.103912 | -0.004458 | -0.442317 |
| 18 | 1  | 0 | -6.442408 | 1.012879  | -0.680141 |
| 19 | 1  | 0 | -6.352403 | -0.636330 | -1.301310 |
| 20 | 1  | 0 | -6.682001 | -0.349932 | 0.419889  |

**Frequency Data:**

Temperature 298.150 Kelvin. Pressure 1.00000 Atm.

|                                              |                             |
|----------------------------------------------|-----------------------------|
| Zero-point correction=                       | 0.141365 (Hartree/Particle) |
| Thermal correction to Energy=                | 0.154660                    |
| Thermal correction to Enthalpy=              | 0.155605                    |
| Thermal correction to Gibbs Free Energy=     | 0.096835                    |
| Sum of electronic and zero-point Energies=   | -1370.854698                |
| Sum of electronic and thermal Energies=      | -1370.841403                |
| Sum of electronic and thermal Enthalpies=    | -1370.840459                |
| Sum of electronic and thermal Free Energies= | -1370.899229                |

#### **(4-methyl benzaldehyde)BF<sub>3</sub> intermediate**

Cartesian Coordinates (Angstroms):

|    |   |   |           |           |           |
|----|---|---|-----------|-----------|-----------|
| 1  | 6 | 0 | -1.564670 | 1.370664  | -0.001357 |
| 2  | 6 | 0 | -2.941519 | 1.177510  | -0.002223 |
| 3  | 6 | 0 | -3.483513 | -0.116575 | -0.002473 |
| 4  | 6 | 0 | -2.606143 | -1.220078 | -0.003746 |
| 5  | 6 | 0 | -1.233257 | -1.040551 | -0.002695 |
| 6  | 6 | 0 | -0.697420 | 0.264265  | -0.001361 |
| 7  | 1 | 0 | -1.153722 | 2.377215  | -0.001549 |
| 8  | 1 | 0 | -3.607242 | 2.035989  | -0.003020 |
| 9  | 1 | 0 | -3.017368 | -2.226236 | -0.005958 |
| 10 | 1 | 0 | -0.555859 | -1.888371 | -0.003803 |
| 11 | 6 | 0 | 0.728416  | 0.493877  | -0.000788 |
| 12 | 8 | 0 | 1.561493  | -0.432304 | -0.000623 |
| 13 | 1 | 0 | 1.097430  | 1.525765  | -0.000233 |
| 14 | 5 | 0 | 3.235831  | -0.079304 | 0.001023  |
| 15 | 9 | 0 | 3.652991  | -0.673057 | -1.163952 |
| 16 | 9 | 0 | 3.650231  | -0.670935 | 1.168101  |
| 17 | 9 | 0 | 3.285850  | 1.307294  | -0.000138 |
| 18 | 6 | 0 | -4.975076 | -0.334948 | 0.005621  |
| 19 | 1 | 0 | -5.282291 | -0.986841 | -0.820728 |
| 20 | 1 | 0 | -5.522350 | 0.607773  | -0.081583 |
| 21 | 1 | 0 | -5.292257 | -0.825056 | 0.934773  |

#### **Frequency Data:**

Temperature 298.150 Kelvin. Pressure 1.00000 Atm.

|                                              |                             |
|----------------------------------------------|-----------------------------|
| Zero-point correction=                       | 0.152512 (Hartree/Particle) |
| Thermal correction to Energy=                | 0.165053                    |
| Thermal correction to Enthalpy=              | 0.165997                    |
| Thermal correction to Gibbs Free Energy=     | 0.111418                    |
| Sum of electronic and zero-point Energies=   | -709.272029                 |
| Sum of electronic and thermal Energies=      | -709.259488                 |
| Sum of electronic and thermal Enthalpies=    | -709.258544                 |
| Sum of electronic and thermal Free Energies= | -709.313123                 |

#### **(4-methyl benzaldehyde)TiCl<sub>4</sub> intermediate**

Cartesian Coordinates (Angstroms):

|   |   |   |          |           |          |
|---|---|---|----------|-----------|----------|
| 1 | 6 | 0 | 3.330919 | 1.441768  | 0.000606 |
| 2 | 6 | 0 | 4.687046 | 1.134322  | 0.002666 |
| 3 | 6 | 0 | 5.118886 | -0.200486 | 0.003547 |

|    |    |   |           |           |           |
|----|----|---|-----------|-----------|-----------|
| 4  | 6  | 0 | 4.152244  | -1.226223 | 0.004826  |
| 5  | 6  | 0 | 2.798658  | -0.932420 | 0.002906  |
| 6  | 6  | 0 | 2.374353  | 0.412105  | 0.000623  |
| 7  | 1  | 0 | 3.005407  | 2.479328  | 0.000382  |
| 8  | 1  | 0 | 5.422312  | 1.934129  | 0.004071  |
| 9  | 1  | 0 | 4.478084  | -2.263240 | 0.008034  |
| 10 | 1  | 0 | 2.052824  | -1.720806 | 0.004434  |
| 11 | 6  | 0 | 0.966698  | 0.759773  | -0.000267 |
| 12 | 8  | 0 | 0.054557  | -0.076956 | 0.000690  |
| 13 | 1  | 0 | 0.707492  | 1.830396  | -0.002144 |
| 14 | 17 | 0 | -1.925911 | 2.145531  | -0.005080 |
| 15 | 17 | 0 | -4.353152 | -0.082013 | -0.001264 |
| 16 | 17 | 0 | -1.856375 | -1.136233 | -1.903515 |
| 17 | 17 | 0 | -1.858094 | -1.127408 | 1.908227  |
| 18 | 22 | 0 | -2.146552 | -0.063692 | -0.000231 |
| 19 | 6  | 0 | 6.587376  | -0.542163 | -0.006332 |
| 20 | 1  | 0 | 6.834423  | -1.246834 | 0.796306  |
| 21 | 1  | 0 | 6.869567  | -1.022134 | -0.952104 |
| 22 | 1  | 0 | 7.210554  | 0.348102  | 0.116876  |

**Frequency Data:**

Temperature 298.150 Kelvin. Pressure 1.00000 Atm.  
 Zero-point correction= 0.145422 (Hartree/Particle)  
 Thermal correction to Energy= 0.162360  
 Thermal correction to Enthalpy= 0.163304  
 Thermal correction to Gibbs Free Energy= 0.096378  
 Sum of electronic and zero-point Energies= -2283.870707  
 Sum of electronic and thermal Energies= -2283.853770  
 Sum of electronic and thermal Enthalpies= -2283.852825  
 Sum of electronic and thermal Free Energies= -2283.919751

**(4-methyl benzaldehyde)SiCl<sub>4</sub> intermediate**

Cartesian Coordinates (Angstroms):

|    |    |   |           |           |           |
|----|----|---|-----------|-----------|-----------|
| 1  | 6  | 0 | 3.599195  | 1.407612  | -0.001115 |
| 2  | 6  | 0 | 4.967949  | 1.145196  | -0.001361 |
| 3  | 6  | 0 | 5.445093  | -0.172307 | -0.001718 |
| 4  | 6  | 0 | 4.511477  | -1.225940 | -0.003799 |
| 5  | 6  | 0 | 3.147464  | -0.972238 | -0.003476 |
| 6  | 6  | 0 | 2.678396  | 0.352578  | -0.002010 |
| 7  | 1  | 0 | 3.240327  | 2.434864  | -0.001372 |
| 8  | 1  | 0 | 5.676408  | 1.969699  | -0.001643 |
| 9  | 1  | 0 | 4.869089  | -2.253104 | -0.006217 |
| 10 | 1  | 0 | 2.422569  | -1.780543 | -0.005469 |
| 11 | 6  | 0 | 1.232673  | 0.636043  | -0.002572 |
| 12 | 8  | 0 | 0.360036  | -0.217183 | -0.003558 |
| 13 | 1  | 0 | 0.962410  | 1.713254  | -0.001800 |
| 14 | 17 | 0 | -2.158013 | 1.936990  | -0.006964 |
| 15 | 17 | 0 | -4.938669 | 0.035447  | 0.003480  |
| 16 | 17 | 0 | -2.258065 | -1.060014 | -1.727403 |
| 17 | 17 | 0 | -2.253026 | -1.048308 | 1.733849  |

|    |    |   |           |           |           |
|----|----|---|-----------|-----------|-----------|
| 18 | 14 | 0 | -2.836695 | -0.044285 | 0.000632  |
| 19 | 6  | 0 | 6.925958  | -0.465609 | 0.007475  |
| 20 | 1  | 0 | 7.224067  | -0.962077 | 0.939744  |
| 21 | 1  | 0 | 7.203276  | -1.136012 | -0.814872 |
| 22 | 1  | 0 | 7.518195  | 0.449412  | -0.087668 |

**Frequency Data:**

Temperature 298.150 Kelvin. Pressure 1.00000 Atm.  
 Zero-point correction= 0.145238 (Hartree/Particle)  
 Thermal correction to Energy= 0.162371  
 Thermal correction to Enthalpy= 0.163315  
 Thermal correction to Gibbs Free Energy= 0.093194  
 Sum of electronic and zero-point Energies= -2229.526284  
 Sum of electronic and thermal Energies= -2229.509150  
 Sum of electronic and thermal Enthalpies= -2229.508206  
 Sum of electronic and thermal Free Energies= -2229.578328

**(4-methyl benzaldehyde)AlCl<sub>3</sub>(anisole) TS**

Cartesian Coordinates (Angstroms):

|    |   |   |           |           |           |
|----|---|---|-----------|-----------|-----------|
| 1  | 6 | 0 | -1.623310 | -2.246624 | 1.275112  |
| 2  | 6 | 0 | -2.573614 | -3.250360 | 1.109844  |
| 3  | 6 | 0 | -3.357961 | -3.320338 | -0.052008 |
| 4  | 6 | 0 | -3.151577 | -2.352803 | -1.042632 |
| 5  | 6 | 0 | -2.197502 | -1.345570 | -0.886449 |
| 6  | 6 | 0 | -1.422366 | -1.283980 | 0.275758  |
| 7  | 1 | 0 | -1.037253 | -2.207715 | 2.191444  |
| 8  | 1 | 0 | -2.718055 | -3.985473 | 1.898405  |
| 9  | 1 | 0 | -3.751896 | -2.379635 | -1.949038 |
| 10 | 1 | 0 | -2.066097 | -0.588014 | -1.651433 |
| 11 | 6 | 0 | -0.371522 | -0.218291 | 0.464604  |
| 12 | 8 | 0 | -0.509687 | 0.876411  | -0.472531 |
| 13 | 6 | 0 | -4.417228 | -4.385911 | -0.208940 |
| 14 | 1 | 0 | -4.645153 | -4.572032 | -1.263510 |
| 15 | 1 | 0 | -5.353925 | -4.085623 | 0.279143  |
| 16 | 1 | 0 | -4.105630 | -5.333317 | 0.244570  |
| 17 | 1 | 0 | -0.381741 | 0.143905  | 1.498410  |
| 18 | 6 | 0 | 1.087053  | -0.628365 | 0.082279  |
| 19 | 6 | 0 | 2.184596  | -0.014293 | 0.786562  |
| 20 | 6 | 0 | 1.385095  | -1.803611 | -0.699662 |
| 21 | 6 | 0 | 3.484502  | -0.432651 | 0.603529  |
| 22 | 1 | 0 | 1.969328  | 0.846861  | 1.416047  |
| 23 | 6 | 0 | 2.678270  | -2.215106 | -0.889978 |
| 24 | 1 | 0 | 0.564300  | -2.335667 | -1.170432 |
| 25 | 6 | 0 | 3.742947  | -1.536296 | -0.241456 |
| 26 | 1 | 0 | 4.292093  | 0.084116  | 1.107542  |
| 27 | 1 | 0 | 2.922557  | -3.068126 | -1.514174 |
| 28 | 1 | 0 | 0.844264  | 0.292880  | -0.745730 |
| 29 | 8 | 0 | 4.958709  | -2.019680 | -0.494152 |
| 30 | 6 | 0 | 6.112057  | -1.414396 | 0.107631  |
| 31 | 1 | 0 | 6.204996  | -0.367468 | -0.198562 |

|    |    |   |           |           |           |
|----|----|---|-----------|-----------|-----------|
| 32 | 1  | 0 | 6.962570  | -1.985007 | -0.263921 |
| 33 | 1  | 0 | 6.064715  | -1.487065 | 1.198931  |
| 34 | 17 | 0 | -2.909379 | 3.104501  | -0.036394 |
| 35 | 17 | 0 | 0.176364  | 2.898283  | 1.907584  |
| 36 | 17 | 0 | 0.346751  | 3.675154  | -1.654967 |
| 37 | 13 | 0 | -0.780571 | 2.641550  | -0.086551 |

**Frequency Data:****NImag:** 1 (-1023)

Temperature 298.150 Kelvin. Pressure 1.00000 Atm.

1 imaginary frequencies ignored.

|                                              |                             |
|----------------------------------------------|-----------------------------|
| Zero-point correction=                       | 0.276104 (Hartree/Particle) |
| Thermal correction to Energy=                | 0.298520                    |
| Thermal correction to Enthalpy=              | 0.299464                    |
| Thermal correction to Gibbs Free Energy=     | 0.219313                    |
| Sum of electronic and zero-point Energies=   | -2114.113358                |
| Sum of electronic and thermal Energies=      | -2114.090943                |
| Sum of electronic and thermal Enthalpies=    | -2114.089999                |
| Sum of electronic and thermal Free Energies= | -2114.170149                |

**(4-methyl benzaldehyde)InCl<sub>3</sub>(anisole) TS**

Cartesian Coordinates (Angstroms):

|    |   |   |           |           |           |
|----|---|---|-----------|-----------|-----------|
| 1  | 6 | 0 | -1.875349 | 2.545098  | 1.256631  |
| 2  | 6 | 0 | -2.418410 | 3.818285  | 1.104975  |
| 3  | 6 | 0 | -2.180113 | 4.573314  | -0.053690 |
| 4  | 6 | 0 | -1.383469 | 4.004975  | -1.055287 |
| 5  | 6 | 0 | -0.838420 | 2.727824  | -0.911844 |
| 6  | 6 | 0 | -1.081505 | 1.983255  | 0.247003  |
| 7  | 1 | 0 | -2.066023 | 1.985143  | 2.170324  |
| 8  | 1 | 0 | -3.028644 | 4.238547  | 1.901269  |
| 9  | 1 | 0 | -1.177732 | 4.572481  | -1.960058 |
| 10 | 1 | 0 | -0.202818 | 2.308501  | -1.684374 |
| 11 | 6 | 0 | -0.518705 | 0.592048  | 0.416243  |
| 12 | 8 | 0 | 0.531643  | 0.298734  | -0.527065 |
| 13 | 6 | 0 | -2.735958 | 5.970810  | -0.197412 |
| 14 | 1 | 0 | -3.699220 | 6.075308  | 0.313611  |
| 15 | 1 | 0 | -2.877683 | 6.239715  | -1.249428 |
| 16 | 1 | 0 | -2.054739 | 6.713320  | 0.239121  |
| 17 | 1 | 0 | -0.184269 | 0.449295  | 1.450772  |
| 18 | 6 | 0 | -1.490235 | -0.574204 | 0.037505  |
| 19 | 6 | 0 | -1.376392 | -1.824633 | 0.750551  |
| 20 | 6 | 0 | -2.700612 | -0.365917 | -0.724429 |
| 21 | 6 | 0 | -2.296134 | -2.836102 | 0.588753  |
| 22 | 1 | 0 | -0.498617 | -1.978585 | 1.375561  |
| 23 | 6 | 0 | -3.610869 | -1.374982 | -0.895364 |
| 24 | 1 | 0 | -2.854509 | 0.598531  | -1.198432 |
| 25 | 6 | 0 | -3.420872 | -2.621264 | -0.241800 |
| 26 | 1 | 0 | -2.152887 | -3.781015 | 1.098529  |
| 27 | 1 | 0 | -4.498983 | -1.249763 | -1.505724 |
| 28 | 1 | 0 | -0.585866 | -0.724226 | -0.804542 |



|    |    |   |           |           |           |
|----|----|---|-----------|-----------|-----------|
| 29 | 8  | 0 | -4.365485 | -3.530856 | -0.473570 |
| 30 | 6  | 0 | -4.280458 | -4.827571 | 0.135871  |
| 31 | 1  | 0 | -3.368324 | -5.344337 | -0.179029 |
| 32 | 1  | 0 | -5.155241 | -5.370120 | -0.220961 |
| 33 | 1  | 0 | -4.313221 | -4.746616 | 1.227023  |
| 34 | 49 | 0 | 2.377093  | -0.394536 | -0.052530 |
| 35 | 17 | 0 | 3.982955  | 1.283236  | -0.236185 |
| 36 | 17 | 0 | 2.028057  | -1.168263 | 2.174883  |
| 37 | 17 | 0 | 2.586456  | -2.205712 | -1.535219 |

**Frequency Data:****NImag:** 1 (-912.9)

Temperature 298.150 Kelvin. Pressure 1.00000 Atm.

1 imaginary frequencies ignored.

|                                              |                             |
|----------------------------------------------|-----------------------------|
| Zero-point correction=                       | 0.274311 (Hartree/Particle) |
| Thermal correction to Energy=                | 0.297660                    |
| Thermal correction to Enthalpy=              | 0.298604                    |
| Thermal correction to Gibbs Free Energy=     | 0.215061                    |
| Sum of electronic and zero-point Energies=   | -2113.969405                |
| Sum of electronic and thermal Energies=      | -2113.946055                |
| Sum of electronic and thermal Enthalpies=    | -2113.945111                |
| Sum of electronic and thermal Free Energies= | -2114.028654                |

**(4-methyl benzaldehyde)ZnCl<sub>2</sub>(anisole) TS**

Cartesian Coordinates (Angstroms):

|    |   |   |           |           |           |
|----|---|---|-----------|-----------|-----------|
| 1  | 6 | 0 | 0.568018  | 2.643197  | 1.318736  |
| 2  | 6 | 0 | 1.052109  | 3.947538  | 1.259005  |
| 3  | 6 | 0 | 1.819647  | 4.385447  | 0.168171  |
| 4  | 6 | 0 | 2.079891  | 3.471585  | -0.860143 |
| 5  | 6 | 0 | 1.595330  | 2.163022  | -0.807343 |
| 6  | 6 | 0 | 0.831568  | 1.735299  | 0.283341  |
| 7  | 1 | 0 | -0.015640 | 2.325699  | 2.181173  |
| 8  | 1 | 0 | 0.840335  | 4.636053  | 2.074297  |
| 9  | 1 | 0 | 2.677685  | 3.784671  | -1.713348 |
| 10 | 1 | 0 | 1.820182  | 1.452273  | -1.595474 |
| 11 | 6 | 0 | 0.292293  | 0.321555  | 0.341760  |
| 12 | 8 | 0 | 0.921583  | -0.549118 | -0.596576 |
| 13 | 6 | 0 | 2.376003  | 5.789698  | 0.125967  |
| 14 | 1 | 0 | 2.584396  | 6.107454  | -0.900975 |
| 15 | 1 | 0 | 3.317999  | 5.859435  | 0.686194  |
| 16 | 1 | 0 | 1.681938  | 6.511454  | 0.570931  |
| 17 | 1 | 0 | 0.364940  | -0.052731 | 1.372658  |
| 18 | 6 | 0 | -1.202319 | 0.173116  | -0.117490 |
| 19 | 6 | 0 | -2.013179 | -0.837204 | 0.529363  |
| 20 | 6 | 0 | -1.912304 | 1.218253  | -0.827858 |
| 21 | 6 | 0 | -3.376243 | -0.896259 | 0.350531  |
| 22 | 1 | 0 | -1.497774 | -1.598955 | 1.114375  |
| 23 | 6 | 0 | -3.265693 | 1.152872  | -1.017901 |
| 24 | 1 | 0 | -1.337887 | 2.038627  | -1.247167 |
| 25 | 6 | 0 | -4.014326 | 0.097841  | -0.429018 |

|    |    |   |           |           |           |
|----|----|---|-----------|-----------|-----------|
| 26 | 1  | 0 | -3.947725 | -1.692821 | 0.811725  |
| 27 | 1  | 0 | -3.804580 | 1.901739  | -1.588851 |
| 28 | 1  | 0 | -0.648692 | -0.491198 | -0.968742 |
| 29 | 8  | 0 | -5.323046 | 0.135132  | -0.669209 |
| 30 | 6  | 0 | -6.186880 | -0.869158 | -0.116189 |
| 31 | 1  | 0 | -5.911676 | -1.862588 | -0.484322 |
| 32 | 1  | 0 | -7.186611 | -0.609882 | -0.462969 |
| 33 | 1  | 0 | -6.155742 | -0.848531 | 0.977706  |
| 34 | 30 | 0 | 1.757655  | -2.231173 | -0.039409 |
| 35 | 17 | 0 | 0.660199  | -2.944283 | 1.833998  |
| 36 | 17 | 0 | 3.330236  | -3.184801 | -1.288365 |

**Frequency Data:****NImag:** 1 (-673.07)

Temperature 298.150 Kelvin. Pressure 1.00000 Atm.

1 imaginary frequencies ignored.

|                                              |                             |
|----------------------------------------------|-----------------------------|
| Zero-point correction=                       | 0.273407 (Hartree/Particle) |
| Thermal correction to Energy=                | 0.294735                    |
| Thermal correction to Enthalpy=              | 0.295679                    |
| Thermal correction to Gibbs Free Energy=     | 0.218444                    |
| Sum of electronic and zero-point Energies=   | -1717.413043                |
| Sum of electronic and thermal Energies=      | -1717.391715                |
| Sum of electronic and thermal Enthalpies=    | -1717.390771                |
| Sum of electronic and thermal Free Energies= | -1717.468006                |

**(4-methyl benzaldehyde)BF<sub>3</sub>(anisole) TS**

Cartesian Coordinates (Angstroms):

|    |   |   |           |           |           |
|----|---|---|-----------|-----------|-----------|
| 1  | 6 | 0 | -1.941033 | -1.179522 | 1.201640  |
| 2  | 6 | 0 | -3.061156 | -1.999974 | 1.100755  |
| 3  | 6 | 0 | -3.966960 | -1.859788 | 0.037515  |
| 4  | 6 | 0 | -3.706185 | -0.872551 | -0.919648 |
| 5  | 6 | 0 | -2.583060 | -0.047584 | -0.826214 |
| 6  | 6 | 0 | -1.687679 | -0.194364 | 0.236697  |
| 7  | 1 | 0 | -1.259936 | -1.303747 | 2.041809  |
| 8  | 1 | 0 | -3.241658 | -2.756602 | 1.861343  |
| 9  | 1 | 0 | -4.395093 | -0.739744 | -1.750910 |
| 10 | 1 | 0 | -2.399716 | 0.729755  | -1.559694 |
| 11 | 6 | 0 | -0.466723 | 0.687023  | 0.352240  |
| 12 | 8 | 0 | -0.452130 | 1.732668  | -0.639773 |
| 13 | 9 | 0 | -0.239623 | 4.014344  | -1.146600 |
| 14 | 9 | 0 | 1.077477  | 3.128319  | 0.561131  |
| 15 | 9 | 0 | -1.197320 | 3.391010  | 0.899523  |
| 16 | 5 | 0 | -0.210879 | 3.144070  | -0.066201 |
| 17 | 6 | 0 | -5.201728 | -2.726607 | -0.048434 |
| 18 | 1 | 0 | -5.560239 | -2.812792 | -1.079541 |
| 19 | 1 | 0 | -6.022903 | -2.306429 | 0.547623  |
| 20 | 1 | 0 | -5.011746 | -3.736946 | 0.330734  |
| 21 | 1 | 0 | -0.404273 | 1.111320  | 1.358553  |
| 22 | 6 | 0 | 0.890447  | -0.004009 | -0.005836 |
| 23 | 6 | 0 | 2.087569  | 0.403463  | 0.690066  |

|    |   |   |          |           |           |
|----|---|---|----------|-----------|-----------|
| 24 | 6 | 0 | 0.950051 | -1.254552 | -0.729097 |
| 25 | 6 | 0 | 3.271703 | -0.288916 | 0.557535  |
| 26 | 1 | 0 | 2.046455 | 1.333416  | 1.247584  |
| 27 | 6 | 0 | 2.129373 | -1.936033 | -0.870926 |
| 28 | 1 | 0 | 0.042388 | -1.628344 | -1.192589 |
| 29 | 6 | 0 | 3.302744 | -1.464530 | -0.225140 |
| 30 | 1 | 0 | 4.164546 | 0.072851  | 1.052985  |
| 31 | 1 | 0 | 2.198394 | -2.851796 | -1.448638 |
| 32 | 1 | 0 | 0.842775 | 0.888812  | -0.862747 |
| 33 | 8 | 0 | 4.392558 | -2.208282 | -0.421338 |
| 34 | 6 | 0 | 5.634278 | -1.834908 | 0.190424  |
| 35 | 1 | 0 | 5.958001 | -0.848315 | -0.156855 |
| 36 | 1 | 0 | 6.350864 | -2.591654 | -0.127641 |
| 37 | 1 | 0 | 5.548474 | -1.841166 | 1.281930  |

**Frequency Data:****NImag:** 1 (-840.7)

Temperature 298.150 Kelvin. Pressure 1.00000 Atm.

1 imaginary frequencies ignored.

|                                              |                             |
|----------------------------------------------|-----------------------------|
| Zero-point correction=                       | 0.284108 (Hartree/Particle) |
| Thermal correction to Energy=                | 0.303901                    |
| Thermal correction to Enthalpy=              | 0.304846                    |
| Thermal correction to Gibbs Free Energy=     | 0.232758                    |
| Sum of electronic and zero-point Energies=   | -1055.833332                |
| Sum of electronic and thermal Energies=      | -1055.813538                |
| Sum of electronic and thermal Enthalpies=    | -1055.812594                |
| Sum of electronic and thermal Free Energies= | -1055.884681                |

**(4-methyl benzaldehyde)TiCl<sub>4</sub>(anisole) TS**

Cartesian Coordinates (Angstroms):

|    |   |   |           |           |           |
|----|---|---|-----------|-----------|-----------|
| 1  | 6 | 0 | 0.486554  | 3.085152  | -1.313003 |
| 2  | 6 | 0 | 0.449097  | 4.455828  | -1.067424 |
| 3  | 6 | 0 | 0.041473  | 4.957054  | 0.177172  |
| 4  | 6 | 0 | -0.322115 | 4.036800  | 1.169509  |
| 5  | 6 | 0 | -0.283385 | 2.662570  | 0.933146  |
| 6  | 6 | 0 | 0.123875  | 2.173031  | -0.313932 |
| 7  | 1 | 0 | 0.791922  | 2.722481  | -2.292216 |
| 8  | 1 | 0 | 0.729022  | 5.148414  | -1.857730 |
| 9  | 1 | 0 | -0.649661 | 4.399918  | 2.140906  |
| 10 | 1 | 0 | -0.591227 | 1.966258  | 1.706867  |
| 11 | 6 | 0 | 0.213410  | 0.695284  | -0.591281 |
| 12 | 8 | 0 | -0.632436 | -0.090198 | 0.290532  |
| 13 | 6 | 0 | -0.040347 | 6.444492  | 0.427697  |
| 14 | 1 | 0 | 0.162038  | 6.686811  | 1.476441  |
| 15 | 1 | 0 | -1.042105 | 6.828321  | 0.193471  |
| 16 | 1 | 0 | 0.672896  | 6.996680  | -0.193348 |
| 17 | 1 | 0 | -0.030656 | 0.488201  | -1.636385 |
| 18 | 6 | 0 | 1.555636  | 0.006604  | -0.185346 |
| 19 | 6 | 0 | 1.926776  | -1.209922 | -0.862331 |

|    |    |   |           |           |           |
|----|----|---|-----------|-----------|-----------|
| 20 | 6  | 0 | 2.584205  | 0.671012  | 0.574592  |
| 21 | 6  | 0 | 3.158145  | -1.797791 | -0.673284 |
| 22 | 1  | 0 | 1.181332  | -1.708180 | -1.477016 |
| 23 | 6  | 0 | 3.808435  | 0.084949  | 0.769161  |
| 24 | 1  | 0 | 2.358585  | 1.631824  | 1.026029  |
| 25 | 6  | 0 | 4.110302  | -1.155840 | 0.151120  |
| 26 | 1  | 0 | 3.383516  | -2.741338 | -1.154791 |
| 27 | 1  | 0 | 4.575833  | 0.552000  | 1.377289  |
| 28 | 1  | 0 | 0.735084  | -0.498741 | 0.652963  |
| 29 | 8  | 0 | 5.326108  | -1.637282 | 0.408115  |
| 30 | 6  | 0 | 5.735613  | -2.891121 | -0.156565 |
| 31 | 1  | 0 | 5.078683  | -3.700133 | 0.178784  |
| 32 | 1  | 0 | 6.746088  | -3.057302 | 0.215325  |
| 33 | 1  | 0 | 5.746646  | -2.840445 | -1.250161 |
| 34 | 17 | 0 | -1.296450 | -2.169356 | 2.077111  |
| 35 | 17 | 0 | -2.587176 | -0.096351 | -1.815907 |
| 36 | 17 | 0 | -1.530204 | -3.148271 | -1.095147 |
| 37 | 17 | 0 | -4.168217 | -1.236692 | 0.807269  |
| 38 | 22 | 0 | -2.081301 | -1.331915 | 0.069203  |

**Frequency Data:****NImag:** 1 (-1189.06)

Temperature 298.150 Kelvin. Pressure 1.00000 Atm.

1 imaginary frequencies ignored.

|                                              |                             |
|----------------------------------------------|-----------------------------|
| Zero-point correction=                       | 0.276644 (Hartree/Particle) |
| Thermal correction to Energy=                | 0.301063                    |
| Thermal correction to Enthalpy=              | 0.302007                    |
| Thermal correction to Gibbs Free Energy=     | 0.216936                    |
| Sum of electronic and zero-point Energies=   | -2630.429081                |
| Sum of electronic and thermal Energies=      | -2630.404663                |
| Sum of electronic and thermal Enthalpies=    | -2630.403719                |
| Sum of electronic and thermal Free Energies= | -2630.488789                |

**(4-methyl benzaldehyde)SiCl<sub>4</sub>(anisole) TS**

Cartesian Coordinates (Angstroms):

|    |   |   |           |           |           |
|----|---|---|-----------|-----------|-----------|
| 1  | 6 | 0 | -1.911652 | -2.284960 | 1.271623  |
| 2  | 6 | 0 | -2.926425 | -3.213630 | 1.055455  |
| 3  | 6 | 0 | -3.614442 | -3.262609 | -0.165871 |
| 4  | 6 | 0 | -3.245836 | -2.352230 | -1.164300 |
| 5  | 6 | 0 | -2.227643 | -1.420777 | -0.957612 |
| 6  | 6 | 0 | -1.549932 | -1.380402 | 0.265207  |
| 7  | 1 | 0 | -1.403046 | -2.258846 | 2.233005  |
| 8  | 1 | 0 | -3.197182 | -3.904011 | 1.850867  |
| 9  | 1 | 0 | -3.769281 | -2.363647 | -2.117390 |
| 10 | 1 | 0 | -1.974472 | -0.706752 | -1.734141 |
| 11 | 6 | 0 | -0.416391 | -0.423126 | 0.514487  |
| 12 | 8 | 0 | -0.400340 | 0.692839  | -0.449086 |
| 13 | 6 | 0 | -4.744074 | -4.242056 | -0.381815 |
| 14 | 1 | 0 | -4.855885 | -4.498826 | -1.440439 |
| 15 | 1 | 0 | -5.700551 | -3.819560 | -0.046583 |

|    |    |   |           |           |           |
|----|----|---|-----------|-----------|-----------|
| 16 | 1  | 0 | -4.584948 | -5.169479 | 0.178774  |
| 17 | 1  | 0 | -0.452531 | -0.039468 | 1.535767  |
| 18 | 6  | 0 | 1.011465  | -0.940764 | 0.163982  |
| 19 | 6  | 0 | 2.140216  | -0.422132 | 0.886716  |
| 20 | 6  | 0 | 1.229301  | -2.115294 | -0.638300 |
| 21 | 6  | 0 | 3.408866  | -0.931407 | 0.707196  |
| 22 | 1  | 0 | 1.994097  | 0.444511  | 1.526493  |
| 23 | 6  | 0 | 2.491277  | -2.620627 | -0.821873 |
| 24 | 1  | 0 | 0.378412  | -2.575572 | -1.130156 |
| 25 | 6  | 0 | 3.596229  | -2.034062 | -0.154939 |
| 26 | 1  | 0 | 4.246036  | -0.478822 | 1.224009  |
| 27 | 1  | 0 | 2.675921  | -3.477269 | -1.461261 |
| 28 | 1  | 0 | 0.873408  | 0.041623  | -0.678316 |
| 29 | 8  | 0 | 4.778191  | -2.598754 | -0.408060 |
| 30 | 6  | 0 | 5.965684  | -2.076047 | 0.202453  |
| 31 | 1  | 0 | 6.123459  | -1.031908 | -0.086653 |
| 32 | 1  | 0 | 6.779999  | -2.691817 | -0.178235 |
| 33 | 1  | 0 | 5.914327  | -2.163060 | 1.292795  |
| 34 | 17 | 0 | 1.334770  | 2.504624  | -1.541192 |
| 35 | 17 | 0 | -2.203733 | 2.018917  | 1.303099  |
| 36 | 17 | 0 | 0.813104  | 3.048161  | 1.577078  |
| 37 | 17 | 0 | -1.536206 | 3.862963  | -1.207881 |
| 38 | 14 | 0 | -0.446096 | 2.419406  | -0.073900 |

**Frequency Data:****NImag:** 1 (-1205.9)

Temperature 298.150 Kelvin. Pressure 1.00000 Atm.

1 imaginary frequencies ignored.

|                                              |                             |
|----------------------------------------------|-----------------------------|
| Zero-point correction=                       | 0.277713 (Hartree/Particle) |
| Thermal correction to Energy=                | 0.301540                    |
| Thermal correction to Enthalpy=              | 0.302484                    |
| Thermal correction to Gibbs Free Energy=     | 0.219904                    |
| Sum of electronic and zero-point Energies=   | -2576.077579                |
| Sum of electronic and thermal Energies=      | -2576.053752                |
| Sum of electronic and thermal Enthalpies=    | -2576.052807                |
| Sum of electronic and thermal Free Energies= | -2576.135387                |

**Indole**

Cartesian Coordinates (Angstroms):

|    |   |   |           |           |           |
|----|---|---|-----------|-----------|-----------|
| 1  | 6 | 0 | -0.250096 | 0.752240  | 0.000021  |
| 2  | 6 | 0 | -0.247903 | -0.671857 | -0.000055 |
| 3  | 6 | 0 | 0.935090  | -1.418800 | 0.000028  |
| 4  | 6 | 0 | 2.135894  | -0.718715 | 0.000189  |
| 5  | 6 | 0 | 2.159313  | 0.691541  | 0.000264  |
| 6  | 6 | 0 | 0.982620  | 1.428929  | 0.000181  |
| 7  | 6 | 0 | -1.626152 | 1.166958  | -0.000074 |
| 8  | 6 | 0 | -2.390290 | 0.030290  | -0.000314 |
| 9  | 1 | 0 | 0.918176  | -2.505834 | -0.000028 |
| 10 | 1 | 0 | 3.073081  | -1.268680 | 0.000262  |
| 11 | 1 | 0 | 3.116223  | 1.206538  | 0.000393  |
| 12 | 1 | 0 | 1.012000  | 2.515704  | 0.000247  |

|    |   |   |           |           |           |
|----|---|---|-----------|-----------|-----------|
| 13 | 1 | 0 | -1.998732 | 2.182179  | -0.000038 |
| 14 | 1 | 0 | -3.465109 | -0.087534 | -0.000484 |
| 15 | 1 | 0 | -1.880874 | -2.038521 | -0.000233 |
| 16 | 7 | 0 | -1.566517 | -1.081052 | -0.000222 |

**Frequency Data:**

Temperature 298.150 Kelvin. Pressure 1.00000 Atm.  
 Zero-point correction= 0.129921 (Hartree/Particle)  
 Thermal correction to Energy= 0.136251  
 Thermal correction to Enthalpy= 0.137195  
 Thermal correction to Gibbs Free Energy= 0.099581  
 Sum of electronic and zero-point Energies= -363.686767  
 Sum of electronic and thermal Energies= -363.680437  
 Sum of electronic and thermal Enthalpies= -363.679493  
 Sum of electronic and thermal Free Energies= -363.717107

**Furan**

Cartesian Coordinates (Angstroms):

|   |   |   |           |           |           |
|---|---|---|-----------|-----------|-----------|
| 1 | 6 | 0 | 1.095015  | -0.347435 | 0.000511  |
| 2 | 6 | 0 | 0.717911  | 0.959937  | -0.000290 |
| 3 | 6 | 0 | -0.718022 | 0.959859  | 0.000057  |
| 4 | 6 | 0 | -1.094973 | -0.347556 | 0.000276  |
| 5 | 8 | 0 | 0.000065  | -1.160967 | -0.000523 |
| 6 | 1 | 0 | 2.050269  | -0.849915 | 0.000841  |
| 7 | 1 | 0 | 1.373597  | 1.819547  | -0.000523 |
| 8 | 1 | 0 | -1.373804 | 1.819397  | 0.000095  |
| 9 | 1 | 0 | -2.050176 | -0.850134 | 0.000448  |

**Frequency Data:**

Temperature 298.150 Kelvin. Pressure 1.00000 Atm.  
 Zero-point correction= 0.070197 (Hartree/Particle)  
 Thermal correction to Energy= 0.073913  
 Thermal correction to Enthalpy= 0.074857  
 Thermal correction to Gibbs Free Energy= 0.043924  
 Sum of electronic and zero-point Energies= -229.950385  
 Sum of electronic and thermal Energies= -229.946669  
 Sum of electronic and thermal Enthalpies= -229.945724  
 Sum of electronic and thermal Free Energies= -229.976657

**Thiophene**

Cartesian Coordinates (Angstroms):

|   |    |   |           |           |           |
|---|----|---|-----------|-----------|-----------|
| 1 | 6  | 0 | 0.011594  | -1.243610 | 0.000036  |
| 2 | 6  | 0 | 1.272654  | -0.715016 | 0.000117  |
| 3 | 6  | 0 | 1.272605  | 0.715088  | 0.000052  |
| 4 | 6  | 0 | 0.011502  | 1.243588  | -0.000035 |
| 5 | 1  | 0 | -0.280797 | -2.285009 | 0.000045  |
| 6 | 1  | 0 | 2.172904  | -1.320175 | 0.000202  |
| 7 | 1  | 0 | 2.172811  | 1.320311  | 0.000088  |
| 8 | 1  | 0 | -0.280936 | 2.284975  | -0.000083 |
| 9 | 16 | 0 | -1.199632 | -0.000025 | -0.000080 |

**Frequency Data:**

Temperature 298.150 Kelvin. Pressure 1.00000 Atm.  
 Zero-point correction= 0.066886 (Hartree/Particle)  
 Thermal correction to Energy= 0.070962  
 Thermal correction to Enthalpy= 0.071906  
 Thermal correction to Gibbs Free Energy= 0.039646  
 Sum of electronic and zero-point Energies= -552.935742  
 Sum of electronic and thermal Energies= -552.931666  
 Sum of electronic and thermal Enthalpies= -552.930722  
 Sum of electronic and thermal Free Energies= -552.962983

### Toluene

Cartesian Coordinates (Angstroms):

|    |   |   |           |           |           |
|----|---|---|-----------|-----------|-----------|
| 1  | 6 | 0 | -1.201444 | 1.205289  | 0.002199  |
| 2  | 6 | 0 | 0.194129  | 1.202402  | -0.008985 |
| 3  | 6 | 0 | 0.913896  | 0.000222  | -0.011390 |
| 4  | 6 | 0 | 0.194385  | -1.202271 | -0.008983 |
| 5  | 6 | 0 | -1.201060 | -1.205493 | 0.002198  |
| 6  | 6 | 0 | -1.905116 | -0.000141 | 0.008471  |
| 7  | 1 | 0 | -1.739014 | 2.150176  | 0.001555  |
| 8  | 1 | 0 | 0.734218  | 2.146899  | -0.017836 |
| 9  | 1 | 0 | 0.734728  | -2.146640 | -0.017849 |
| 10 | 1 | 0 | -1.738458 | -2.150479 | 0.001552  |
| 11 | 1 | 0 | -2.991869 | -0.000325 | 0.013921  |
| 12 | 6 | 0 | 2.425551  | 0.000097  | 0.009375  |
| 13 | 1 | 0 | 2.809992  | -0.012910 | 1.038355  |
| 14 | 1 | 0 | 2.834300  | -0.879700 | -0.499566 |
| 15 | 1 | 0 | 2.834049  | 0.892351  | -0.477447 |

### **Frequency Data:**

Temperature 298.150 Kelvin. Pressure 1.00000 Atm.  
 Zero-point correction= 0.128330 (Hartree/Particle)  
 Thermal correction to Energy= 0.134525  
 Thermal correction to Enthalpy= 0.135469  
 Thermal correction to Gibbs Free Energy= 0.097789  
 Sum of electronic and zero-point Energies= -271.438320  
 Sum of electronic and thermal Energies= -271.432125  
 Sum of electronic and thermal Enthalpies= -271.431181  
 Sum of electronic and thermal Free Energies= -271.468861

### Benzene

Cartesian Coordinates (Angstroms):

|   |   |   |           |           |           |
|---|---|---|-----------|-----------|-----------|
| 1 | 6 | 0 | 1.062830  | -0.905897 | -0.000005 |
| 2 | 6 | 0 | -0.253256 | -1.373251 | -0.000068 |
| 3 | 6 | 0 | -1.315989 | -0.467462 | 0.000055  |
| 4 | 6 | 0 | -1.062753 | 0.905985  | -0.000008 |
| 5 | 6 | 0 | 0.253140  | 1.373269  | -0.000061 |
| 6 | 6 | 0 | 1.316029  | 0.467357  | 0.000057  |
| 7 | 1 | 0 | 1.889716  | -1.610996 | 0.000066  |
| 8 | 1 | 0 | -0.450131 | -2.441986 | -0.000077 |

|    |   |   |           |           |           |
|----|---|---|-----------|-----------|-----------|
| 9  | 1 | 0 | -2.340030 | -0.831097 | 0.000153  |
| 10 | 1 | 0 | -1.889811 | 1.610872  | -0.000007 |
| 11 | 1 | 0 | 0.450262  | 2.441951  | -0.000019 |
| 12 | 1 | 0 | 2.339987  | 0.831246  | 0.000064  |

**Frequency Data:**

Temperature 298.150 Kelvin. Pressure 1.00000 Atm.  
 Zero-point correction= 0.100768 (Hartree/Particle)  
 Thermal correction to Energy= 0.105157  
 Thermal correction to Enthalpy= 0.106101  
 Thermal correction to Gibbs Free Energy= 0.073305  
 Sum of electronic and zero-point Energies= -232.147884  
 Sum of electronic and thermal Energies= -232.143495  
 Sum of electronic and thermal Enthalpies= -232.142551  
 Sum of electronic and thermal Free Energies= -232.175347

**Chloro benzene**

Cartesian Coordinates (Angstroms):

|    |    |   |           |           |           |
|----|----|---|-----------|-----------|-----------|
| 1  | 6  | 0 | -1.574431 | 1.207479  | -0.000002 |
| 2  | 6  | 0 | -0.178534 | 1.216120  | -0.000005 |
| 3  | 6  | 0 | 0.503667  | 0.000014  | 0.000013  |
| 4  | 6  | 0 | -0.178529 | -1.216115 | 0.000005  |
| 5  | 6  | 0 | -1.574407 | -1.207495 | -0.000011 |
| 6  | 6  | 0 | -2.274914 | -0.000002 | 0.000006  |
| 7  | 1  | 0 | -2.112365 | 2.151552  | -0.000004 |
| 8  | 1  | 0 | 0.374577  | 2.149415  | -0.000002 |
| 9  | 1  | 0 | 0.374622  | -2.149387 | 0.000009  |
| 10 | 1  | 0 | -2.112359 | -2.151557 | -0.000015 |
| 11 | 1  | 0 | -3.361070 | -0.000024 | 0.000013  |
| 12 | 17 | 0 | 2.264676  | 0.000000  | -0.000002 |

**Frequency Data:**

Temperature 298.150 Kelvin. Pressure 1.00000 Atm.  
 Zero-point correction= 0.091222 (Hartree/Particle)  
 Thermal correction to Energy= 0.096717  
 Thermal correction to Enthalpy= 0.097662  
 Thermal correction to Gibbs Free Energy= 0.061441  
 Sum of electronic and zero-point Energies= -691.753753  
 Sum of electronic and thermal Energies= -691.748257  
 Sum of electronic and thermal Enthalpies= -691.747313  
 Sum of electronic and thermal Free Energies= -691.783533

**cyano benzene**

Cartesian Coordinates (Angstroms):

|   |   |   |           |           |          |
|---|---|---|-----------|-----------|----------|
| 1 | 6 | 0 | -1.483966 | -1.210933 | 0.000001 |
| 2 | 6 | 0 | -0.091452 | -1.217468 | 0.000001 |
| 3 | 6 | 0 | 0.610245  | -0.000001 | 0.000003 |
| 4 | 6 | 0 | -0.091452 | 1.217468  | 0.000002 |
| 5 | 6 | 0 | -1.483966 | 1.210933  | 0.000000 |



|    |   |   |           |           |           |
|----|---|---|-----------|-----------|-----------|
| 6  | 6 | 0 | -2.180551 | -0.000001 | 0.000001  |
| 7  | 1 | 0 | -2.026187 | -2.151985 | 0.000000  |
| 8  | 1 | 0 | 0.458899  | -2.152775 | 0.000001  |
| 9  | 1 | 0 | 0.458900  | 2.152775  | 0.000002  |
| 10 | 1 | 0 | -2.026188 | 2.151984  | -0.000001 |
| 11 | 1 | 0 | -3.266968 | 0.000001  | 0.000001  |
| 12 | 6 | 0 | 2.044973  | 0.000001  | 0.000002  |
| 13 | 7 | 0 | 3.208365  | 0.000000  | -0.000008 |

**Frequency Data:**

Temperature 298.150 Kelvin. Pressure 1.00000 Atm.  
 Zero-point correction= 0.099441 (Hartree/Particle)  
 Thermal correction to Energy= 0.105544  
 Thermal correction to Enthalpy= 0.106488  
 Thermal correction to Gibbs Free Energy= 0.069163  
 Sum of electronic and zero-point Energies= -324.392775  
 Sum of electronic and thermal Energies= -324.386672  
 Sum of electronic and thermal Enthalpies= -324.385728  
 Sum of electronic and thermal Free Energies= -324.423053

**(4-methyl benzaldehyde)AlCl<sub>3</sub>(Indole) TS**

Cartesian Coordinates (Angstroms):

|    |    |   |           |           |           |
|----|----|---|-----------|-----------|-----------|
| 1  | 6  | 0 | 1.592636  | 1.766251  | -1.440978 |
| 2  | 6  | 0 | 2.438552  | 2.861162  | -1.282430 |
| 3  | 6  | 0 | 2.461212  | 3.589841  | -0.083992 |
| 4  | 6  | 0 | 1.610060  | 3.179525  | 0.950212  |
| 5  | 6  | 0 | 0.761757  | 2.081129  | 0.800504  |
| 6  | 6  | 0 | 0.749888  | 1.361418  | -0.397872 |
| 7  | 1  | 0 | 1.588900  | 1.223285  | -2.384027 |
| 8  | 1  | 0 | 3.085504  | 3.160599  | -2.103748 |
| 9  | 1  | 0 | 1.602409  | 3.732467  | 1.886645  |
| 10 | 1  | 0 | 0.096605  | 1.785237  | 1.604204  |
| 11 | 6  | 0 | -0.142742 | 0.159967  | -0.588088 |
| 12 | 8  | 0 | -1.142537 | 0.024168  | 0.467679  |
| 13 | 1  | 0 | -0.627347 | 0.201725  | -1.569341 |
| 14 | 1  | 0 | -0.397568 | -1.154618 | 0.562153  |
| 15 | 6  | 0 | 0.521534  | -1.221492 | -0.385191 |
| 16 | 6  | 0 | 1.870414  | -1.587353 | 0.092880  |
| 17 | 6  | 0 | 2.057074  | -2.950685 | -0.221667 |
| 18 | 1  | 0 | 0.749028  | -4.334153 | -1.218816 |
| 19 | 17 | 0 | -3.748220 | -0.954061 | 1.988900  |
| 20 | 17 | 0 | -3.634268 | 2.102231  | -0.083856 |
| 21 | 17 | 0 | -3.230713 | -1.171623 | -1.624213 |
| 22 | 6  | 0 | 3.348983  | 4.802427  | 0.071027  |
| 23 | 1  | 0 | 2.842709  | 5.709544  | -0.284848 |
| 24 | 1  | 0 | 3.618187  | 4.971327  | 1.118955  |
| 25 | 1  | 0 | 4.274378  | 4.700246  | -0.506114 |
| 26 | 6  | 0 | 3.196071  | -3.672951 | 0.129115  |
| 27 | 6  | 0 | 2.885277  | -0.911595 | 0.781299  |
| 28 | 6  | 0 | 4.036860  | -1.616356 | 1.125784  |

|    |    |   |           |           |           |
|----|----|---|-----------|-----------|-----------|
| 29 | 6  | 0 | 4.191503  | -2.977882 | 0.810027  |
| 30 | 1  | 0 | 2.777672  | 0.135047  | 1.039831  |
| 31 | 6  | 0 | 0.040560  | -2.384473 | -1.058431 |
| 32 | 7  | 0 | 0.915863  | -3.381308 | -0.919495 |
| 33 | 1  | 0 | -0.915114 | -2.508624 | -1.555772 |
| 34 | 1  | 0 | 5.100066  | -3.496110 | 1.101104  |
| 35 | 1  | 0 | 4.834403  | -1.102072 | 1.653650  |
| 36 | 1  | 0 | 3.304467  | -4.725126 | -0.117069 |
| 37 | 13 | 0 | -2.961420 | 0.054010  | 0.221608  |

**Frequency Data:**

NImag: 1 (-1391.1)

Temperature 298.150 Kelvin. Pressure 1.00000 Atm.

1 imaginary frequencies ignored.

|                                              |                             |
|----------------------------------------------|-----------------------------|
| Zero-point correction=                       | 0.273253 (Hartree/Particle) |
| Thermal correction to Energy=                | 0.294836                    |
| Thermal correction to Enthalpy=              | 0.295780                    |
| Thermal correction to Gibbs Free Energy=     | 0.217859                    |
| Sum of electronic and zero-point Energies=   | -2131.174631                |
| Sum of electronic and thermal Energies=      | -2131.153048                |
| Sum of electronic and thermal Enthalpies=    | -2131.152104                |
| Sum of electronic and thermal Free Energies= | -2131.230025                |

**(4-methyl benzaldehyde)AlCl<sub>3</sub>(Furan) TS**

Cartesian Coordinates (Angstroms):

|    |    |   |           |           |           |
|----|----|---|-----------|-----------|-----------|
| 1  | 6  | 0 | 2.666142  | 0.230956  | 1.172532  |
| 2  | 6  | 0 | 3.963973  | -0.250569 | 1.029354  |
| 3  | 6  | 0 | 4.320298  | -1.059251 | -0.061866 |
| 4  | 6  | 0 | 3.331863  | -1.363241 | -1.005589 |
| 5  | 6  | 0 | 2.028641  | -0.881040 | -0.873164 |
| 6  | 6  | 0 | 1.686337  | -0.077897 | 0.218929  |
| 7  | 1  | 0 | 2.411729  | 0.842935  | 2.035723  |
| 8  | 1  | 0 | 4.710945  | -0.006511 | 1.781152  |
| 9  | 1  | 0 | 3.580246  | -1.994997 | -1.855043 |
| 10 | 1  | 0 | 1.265955  | -1.146896 | -1.597074 |
| 11 | 6  | 0 | 0.289361  | 0.467630  | 0.375806  |
| 12 | 8  | 0 | -0.667095 | -0.190885 | -0.495055 |
| 13 | 1  | 0 | -0.036178 | 0.440480  | 1.421544  |
| 14 | 1  | 0 | -0.712034 | 1.205160  | -0.898168 |
| 15 | 6  | 0 | 0.076236  | 1.894161  | -0.172952 |
| 16 | 6  | 0 | 0.861961  | 2.725976  | -1.016142 |
| 17 | 6  | 0 | 0.451738  | 4.043662  | -0.821040 |
| 18 | 1  | 0 | 1.599101  | 2.356831  | -1.717207 |
| 19 | 6  | 0 | -0.501916 | 3.991497  | 0.187998  |
| 20 | 1  | 0 | 0.787700  | 4.930468  | -1.338964 |
| 21 | 1  | 0 | -1.104209 | 4.765156  | 0.646727  |
| 22 | 8  | 0 | -0.712626 | 2.761072  | 0.614721  |
| 23 | 13 | 0 | -2.239550 | -1.017303 | -0.003500 |
| 24 | 17 | 0 | -3.747464 | 0.462246  | -0.633569 |
| 25 | 17 | 0 | -2.368931 | -2.909857 | -1.069103 |

|    |    |   |           |           |           |
|----|----|---|-----------|-----------|-----------|
| 26 | 17 | 0 | -2.117416 | -1.203824 | 2.184899  |
| 27 | 6  | 0 | 5.719190  | -1.614436 | -0.189463 |
| 28 | 1  | 0 | 5.957448  | -1.866136 | -1.227882 |
| 29 | 1  | 0 | 6.469723  | -0.901807 | 0.169695  |
| 30 | 1  | 0 | 5.833334  | -2.531545 | 0.403403  |

**Frequency Data:**

NImag: 1 (-1197.5)

Temperature 298.150 Kelvin. Pressure 1.00000 Atm.

1 imaginary frequencies ignored.

|                                              |                             |
|----------------------------------------------|-----------------------------|
| Zero-point correction=                       | 0.212884 (Hartree/Particle) |
| Thermal correction to Energy=                | 0.231911                    |
| Thermal correction to Enthalpy=              | 0.232855                    |
| Thermal correction to Gibbs Free Energy=     | 0.159731                    |
| Sum of electronic and zero-point Energies=   | -1997.427228                |
| Sum of electronic and thermal Energies=      | -1997.408201                |
| Sum of electronic and thermal Enthalpies=    | -1997.407257                |
| Sum of electronic and thermal Free Energies= | -1997.480381                |

**(4-methyl benzaldehyde)AlCl<sub>3</sub>(Thiophene) TS**

Cartesian Coordinates (Angstroms):

|    |    |   |           |           |           |
|----|----|---|-----------|-----------|-----------|
| 1  | 6  | 0 | -2.633614 | 0.112614  | -1.218653 |
| 2  | 6  | 0 | -3.952534 | -0.314120 | -1.090907 |
| 3  | 6  | 0 | -4.373414 | -1.039005 | 0.034951  |
| 4  | 6  | 0 | -3.427746 | -1.315834 | 1.029858  |
| 5  | 6  | 0 | -2.104261 | -0.888892 | 0.911979  |
| 6  | 6  | 0 | -1.696664 | -0.168472 | -0.215314 |
| 7  | 1  | 0 | -2.330048 | 0.661943  | -2.107660 |
| 8  | 1  | 0 | -4.665421 | -0.092079 | -1.881582 |
| 9  | 1  | 0 | -3.726485 | -1.883640 | 1.907826  |
| 10 | 1  | 0 | -1.375807 | -1.134716 | 1.677032  |
| 11 | 6  | 0 | -0.277576 | 0.323612  | -0.356305 |
| 12 | 8  | 0 | 0.637104  | -0.334778 | 0.559816  |
| 13 | 1  | 0 | 0.063837  | 0.237408  | -1.392881 |
| 14 | 1  | 0 | 0.700880  | 1.066726  | 0.936692  |
| 15 | 6  | 0 | -0.032654 | 1.767966  | 0.159657  |
| 16 | 6  | 0 | -0.900028 | 2.541039  | 0.985660  |
| 17 | 6  | 0 | -0.570425 | 3.892250  | 1.041529  |
| 18 | 1  | 0 | -1.708960 | 2.076151  | 1.538886  |
| 19 | 6  | 0 | 0.483382  | 4.206092  | 0.186081  |
| 20 | 1  | 0 | -1.063084 | 4.621878  | 1.673280  |
| 21 | 1  | 0 | 0.946139  | 5.180381  | 0.074645  |
| 22 | 13 | 0 | 2.124581  | -1.291804 | 0.054093  |
| 23 | 17 | 0 | 3.423497  | -1.191390 | 1.803438  |
| 24 | 17 | 0 | 1.524462  | -3.293922 | -0.559569 |
| 25 | 17 | 0 | 2.878803  | -0.088605 | -1.655100 |
| 26 | 6  | 0 | -5.794575 | -1.537813 | 0.149067  |
| 27 | 1  | 0 | -6.088894 | -1.674483 | 1.194771  |
| 28 | 1  | 0 | -6.503227 | -0.844783 | -0.317183 |
| 29 | 1  | 0 | -5.911789 | -2.507862 | -0.351868 |

30 16 0 1.098260 2.877795 -0.678023

**Frequency Data:**

**NImag:** 1 (-1208.1)

Temperature 298.150 Kelvin. Pressure 1.00000 Atm.

1 imaginary frequencies ignored.

Zero-point correction= 0.209578 (Hartree/Particle)

Thermal correction to Energy= 0.228996

Thermal correction to Enthalpy= 0.229941

Thermal correction to Gibbs Free Energy= 0.156706

Sum of electronic and zero-point Energies= -2320.410493

Sum of electronic and thermal Energies= -2320.391074

Sum of electronic and thermal Enthalpies= -2320.390130

Sum of electronic and thermal Free Energies= -2320.463365

**(4-methyl benzaldehyde)AlCl<sub>3</sub>(toluene) TS**

Cartesian Coordinates (Angstroms):

|    |    |   |           |           |           |
|----|----|---|-----------|-----------|-----------|
| 1  | 6  | 0 | 2.666379  | -0.063248 | 1.276003  |
| 2  | 6  | 0 | 4.009848  | -0.384892 | 1.103378  |
| 3  | 6  | 0 | 4.458744  | -1.013195 | -0.068784 |
| 4  | 6  | 0 | 3.514966  | -1.301909 | -1.062167 |
| 5  | 6  | 0 | 2.166748  | -0.979563 | -0.898099 |
| 6  | 6  | 0 | 1.729745  | -0.354778 | 0.274638  |
| 7  | 1  | 0 | 2.342453  | 0.412255  | 2.199971  |
| 8  | 1  | 0 | 4.721150  | -0.155592 | 1.893580  |
| 9  | 1  | 0 | 3.835906  | -1.795763 | -1.976393 |
| 10 | 1  | 0 | 1.441417  | -1.232277 | -1.663888 |
| 11 | 6  | 0 | 0.281501  | 0.023170  | 0.466987  |
| 12 | 8  | 0 | -0.593482 | -0.623409 | -0.473279 |
| 13 | 6  | 0 | 5.909653  | -1.399333 | -0.235098 |
| 14 | 1  | 0 | 6.195983  | -1.437476 | -1.291308 |
| 15 | 1  | 0 | 6.104040  | -2.392709 | 0.190643  |
| 16 | 1  | 0 | 6.575174  | -0.693274 | 0.273335  |
| 17 | 1  | 0 | -0.025536 | -0.173447 | 1.500596  |
| 18 | 6  | 0 | -0.068850 | 1.511153  | 0.122230  |
| 19 | 6  | 0 | -1.136948 | 2.162106  | 0.844378  |
| 20 | 6  | 0 | 0.800448  | 2.348588  | -0.664822 |
| 21 | 6  | 0 | -1.386290 | 3.508828  | 0.671200  |
| 22 | 1  | 0 | -1.782722 | 1.547101  | 1.467709  |
| 23 | 6  | 0 | 0.520486  | 3.687424  | -0.835643 |
| 24 | 1  | 0 | 1.656894  | 1.892264  | -1.151865 |
| 25 | 6  | 0 | -0.570073 | 4.291687  | -0.170008 |
| 26 | 1  | 0 | -2.216616 | 3.974929  | 1.193908  |
| 27 | 1  | 0 | 1.158801  | 4.297954  | -1.468219 |
| 28 | 1  | 0 | -0.753098 | 0.935641  | -0.722877 |
| 29 | 17 | 0 | -1.358790 | -3.798354 | -0.001989 |
| 30 | 17 | 0 | -2.721727 | -0.986028 | 1.882218  |
| 31 | 17 | 0 | -3.436477 | -1.272330 | -1.688944 |
| 32 | 13 | 0 | -1.999520 | -1.716402 | -0.096194 |
| 33 | 6  | 0 | -0.870570 | 5.748681  | -0.377801 |
| 34 | 1  | 0 | 0.037440  | 6.321982  | -0.587887 |

|    |   |   |           |          |           |
|----|---|---|-----------|----------|-----------|
| 35 | 1 | 0 | -1.540301 | 5.870779 | -1.240491 |
| 36 | 1 | 0 | -1.375193 | 6.183926 | 0.489725  |

**Frequency Data:****NImag:** 1 (-732.5)

Temperature 298.150 Kelvin. Pressure 1.00000 Atm.

1 imaginary frequencies ignored.

|                                              |                             |
|----------------------------------------------|-----------------------------|
| Zero-point correction=                       | 0.270514 (Hartree/Particle) |
| Thermal correction to Energy=                | 0.292231                    |
| Thermal correction to Enthalpy=              | 0.293175                    |
| Thermal correction to Gibbs Free Energy=     | 0.214470                    |
| Sum of electronic and zero-point Energies=   | -2038.906962                |
| Sum of electronic and thermal Energies=      | -2038.885246                |
| Sum of electronic and thermal Enthalpies=    | -2038.884301                |
| Sum of electronic and thermal Free Energies= | -2038.963006                |

**(4-methyl benzaldehyde)AlCl<sub>3</sub>(benzene) TS**

Cartesian Coordinates (Angstroms):

|    |    |   |           |           |           |
|----|----|---|-----------|-----------|-----------|
| 1  | 6  | 0 | 2.737810  | 0.085101  | 1.252551  |
| 2  | 6  | 0 | 4.070086  | -0.282146 | 1.084258  |
| 3  | 6  | 0 | 4.486052  | -0.997320 | -0.049888 |
| 4  | 6  | 0 | 3.521116  | -1.325205 | -1.010191 |
| 5  | 6  | 0 | 2.183861  | -0.957650 | -0.850554 |
| 6  | 6  | 0 | 1.779750  | -0.246800 | 0.284301  |
| 7  | 1  | 0 | 2.439457  | 0.627444  | 2.147937  |
| 8  | 1  | 0 | 4.798324  | -0.020465 | 1.848507  |
| 9  | 1  | 0 | 3.816489  | -1.885041 | -1.894546 |
| 10 | 1  | 0 | 1.440683  | -1.239745 | -1.588378 |
| 11 | 6  | 0 | 0.342152  | 0.172902  | 0.472699  |
| 12 | 8  | 0 | -0.544660 | -0.498323 | -0.430912 |
| 13 | 6  | 0 | 5.924141  | -1.431465 | -0.208697 |
| 14 | 1  | 0 | 6.195714  | -1.541624 | -1.263722 |
| 15 | 1  | 0 | 6.098152  | -2.401929 | 0.274845  |
| 16 | 1  | 0 | 6.614240  | -0.713828 | 0.248039  |
| 17 | 1  | 0 | 0.041606  | 0.021939  | 1.515750  |
| 18 | 6  | 0 | 0.029405  | 1.655120  | 0.071808  |
| 19 | 6  | 0 | -1.062310 | 2.333926  | 0.731693  |
| 20 | 6  | 0 | 0.922325  | 2.445418  | -0.738158 |
| 21 | 6  | 0 | -1.310220 | 3.672938  | 0.482399  |
| 22 | 1  | 0 | -1.722511 | 1.749113  | 1.368254  |
| 23 | 6  | 0 | 0.644350  | 3.775566  | -0.990819 |
| 24 | 1  | 0 | 1.785457  | 1.957925  | -1.180667 |
| 25 | 6  | 0 | -0.461466 | 4.385811  | -0.375067 |
| 26 | 1  | 0 | -2.155714 | 4.166929  | 0.949859  |
| 27 | 1  | 0 | 1.289957  | 4.355758  | -1.642527 |
| 28 | 1  | 0 | -0.645015 | 1.092946  | -0.781218 |
| 29 | 17 | 0 | -2.223785 | -3.319883 | -0.703733 |
| 30 | 17 | 0 | -2.451844 | -0.950958 | 2.111491  |
| 31 | 17 | 0 | -3.543228 | 0.084356  | -1.173588 |
| 32 | 13 | 0 | -2.161396 | -1.243513 | -0.069555 |

33 1 0 -0.663158 5.435907 -0.569514

**Frequency Data:**

**NImag:** 1 (-633.7)

Temperature 298.150 Kelvin. Pressure 1.00000 Atm.

1 imaginary frequencies ignored.

Zero-point correction= 0.243004 (Hartree/Particle)

Thermal correction to Energy= 0.262884

Thermal correction to Enthalpy= 0.263828

Thermal correction to Gibbs Free Energy= 0.189631

Sum of electronic and zero-point Energies= -1999.612204

Sum of electronic and thermal Energies= -1999.592325

Sum of electronic and thermal Enthalpies= -1999.591380

Sum of electronic and thermal Free Energies= -1999.665577

**(4-methyl benzaldehyde)AlCl<sub>3</sub>(Chlorobenzene) TS**

Cartesian Coordinates (Angstroms):

|    |    |   |           |           |           |
|----|----|---|-----------|-----------|-----------|
| 1  | 6  | 0 | 0.882714  | 2.553763  | 1.273646  |
| 2  | 6  | 0 | 1.484253  | 3.797168  | 1.104791  |
| 3  | 6  | 0 | 2.183677  | 4.109138  | -0.072432 |
| 4  | 6  | 0 | 2.252346  | 3.133700  | -1.074449 |
| 5  | 6  | 0 | 1.648551  | 1.885172  | -0.914486 |
| 6  | 6  | 0 | 0.956813  | 1.583651  | 0.263365  |
| 7  | 1  | 0 | 0.359922  | 2.331768  | 2.202192  |
| 8  | 1  | 0 | 1.422772  | 4.534568  | 1.901880  |
| 9  | 1  | 0 | 2.796172  | 3.347518  | -1.991459 |
| 10 | 1  | 0 | 1.733636  | 1.127395  | -1.685784 |
| 11 | 6  | 0 | 0.287388  | 0.245734  | 0.453568  |
| 12 | 8  | 0 | 0.738198  | -0.741196 | -0.482690 |
| 13 | 6  | 0 | 2.871030  | 5.444499  | -0.232013 |
| 14 | 1  | 0 | 3.054809  | 5.677610  | -1.285631 |
| 15 | 1  | 0 | 3.842994  | 5.449491  | 0.278698  |
| 16 | 1  | 0 | 2.276068  | 6.257619  | 0.198642  |
| 17 | 1  | 0 | 0.409112  | -0.091695 | 1.489716  |
| 18 | 6  | 0 | -1.247896 | 0.216399  | 0.111031  |
| 19 | 6  | 0 | -2.095572 | -0.710959 | 0.827390  |
| 20 | 6  | 0 | -1.896134 | 1.273197  | -0.626665 |
| 21 | 6  | 0 | -3.469597 | -0.664733 | 0.701085  |
| 22 | 1  | 0 | -1.614661 | -1.496628 | 1.407989  |
| 23 | 6  | 0 | -3.266414 | 1.304324  | -0.766345 |
| 24 | 1  | 0 | -1.277228 | 2.025381  | -1.106415 |
| 25 | 6  | 0 | -4.044495 | 0.340845  | -0.094052 |
| 26 | 1  | 0 | -4.103030 | -1.384551 | 1.207367  |
| 27 | 1  | 0 | -3.754469 | 2.069927  | -1.359197 |
| 28 | 1  | 0 | -0.841144 | -0.546945 | -0.747596 |
| 29 | 17 | 0 | 3.700159  | -2.091897 | 0.067825  |
| 30 | 17 | 0 | 0.623121  | -2.912198 | 1.847996  |
| 31 | 17 | 0 | 0.881716  | -3.643452 | -1.724131 |
| 32 | 13 | 0 | 1.540203  | -2.330202 | -0.102426 |
| 33 | 17 | 0 | -5.764593 | 0.403392  | -0.253098 |

**Frequency Data:****NImag:** 1 (-642.9)

Temperature 298.150 Kelvin. Pressure 1.00000 Atm.

1 imaginary frequencies ignored.

|                                              |                             |
|----------------------------------------------|-----------------------------|
| Zero-point correction=                       | 0.233252 (Hartree/Particle) |
| Thermal correction to Energy=                | 0.254359                    |
| Thermal correction to Enthalpy=              | 0.255303                    |
| Thermal correction to Gibbs Free Energy=     | 0.177393                    |
| Sum of electronic and zero-point Energies=   | -2459.212508                |
| Sum of electronic and thermal Energies=      | -2459.191401                |
| Sum of electronic and thermal Enthalpies=    | -2459.190457                |
| Sum of electronic and thermal Free Energies= | -2459.268367                |

**(4-methyl benzaldehyde)AlCl<sub>3</sub>(cyanobenzene) TS**

Cartesian Coordinates (Angstroms):

|    |    |   |           |           |           |
|----|----|---|-----------|-----------|-----------|
| 1  | 6  | 0 | 2.760907  | 0.635575  | 1.277345  |
| 2  | 6  | 0 | 4.127033  | 0.818820  | 1.087177  |
| 3  | 6  | 0 | 4.760178  | 0.378977  | -0.087175 |
| 4  | 6  | 0 | 3.974512  | -0.245561 | -1.063750 |
| 5  | 6  | 0 | 2.602741  | -0.430127 | -0.882542 |
| 6  | 6  | 0 | 1.982480  | 0.010427  | 0.291916  |
| 7  | 1  | 0 | 2.297291  | 0.973129  | 2.202527  |
| 8  | 1  | 0 | 4.716250  | 1.300268  | 1.864195  |
| 9  | 1  | 0 | 4.442896  | -0.601699 | -1.978215 |
| 10 | 1  | 0 | 2.008436  | -0.938491 | -1.633995 |
| 11 | 6  | 0 | 0.499567  | -0.162083 | 0.500322  |
| 12 | 8  | 0 | -0.070082 | -1.094522 | -0.418473 |
| 13 | 6  | 0 | 6.249965  | 0.544604  | -0.270233 |
| 14 | 1  | 0 | 6.529496  | 0.520325  | -1.328321 |
| 15 | 1  | 0 | 6.799409  | -0.262905 | 0.231526  |
| 16 | 1  | 0 | 6.605179  | 1.489569  | 0.155323  |
| 17 | 1  | 0 | 0.296198  | -0.440847 | 1.541095  |
| 18 | 6  | 0 | -0.358692 | 1.112786  | 0.159493  |
| 19 | 6  | 0 | -1.603586 | 1.317246  | 0.866943  |
| 20 | 6  | 0 | 0.166781  | 2.220778  | -0.602156 |
| 21 | 6  | 0 | -2.325117 | 2.485881  | 0.711377  |
| 22 | 1  | 0 | -1.993547 | 0.502574  | 1.472799  |
| 23 | 6  | 0 | -0.570733 | 3.373145  | -0.773393 |
| 24 | 1  | 0 | 1.135988  | 2.107956  | -1.077861 |
| 25 | 6  | 0 | -1.811572 | 3.511050  | -0.108584 |
| 26 | 1  | 0 | -3.275877 | 2.621685  | 1.214837  |
| 27 | 1  | 0 | -0.199632 | 4.187397  | -1.386255 |
| 28 | 1  | 0 | -0.785350 | 0.394751  | -0.717908 |
| 29 | 17 | 0 | -0.828623 | -4.257110 | -0.919344 |
| 30 | 17 | 0 | -1.666074 | -2.287237 | 2.096134  |
| 31 | 17 | 0 | -3.126796 | -1.377483 | -1.067400 |
| 32 | 13 | 0 | -1.367455 | -2.323668 | -0.101736 |
| 33 | 6  | 0 | -2.555817 | 4.724797  | -0.268517 |
| 34 | 7  | 0 | -3.152238 | 5.714768  | -0.396907 |

**Frequency Data:****NImag:** 1 (-528.8)

Temperature 298.150 Kelvin. Pressure 1.00000 Atm.

1 imaginary frequencies ignored.

|                                              |                             |
|----------------------------------------------|-----------------------------|
| Zero-point correction=                       | 0.241129 (Hartree/Particle) |
| Thermal correction to Energy=                | 0.262862                    |
| Thermal correction to Enthalpy=              | 0.263806                    |
| Thermal correction to Gibbs Free Energy=     | 0.185329                    |
| Sum of electronic and zero-point Energies=   | -2091.842785                |
| Sum of electronic and thermal Energies=      | -2091.821052                |
| Sum of electronic and thermal Enthalpies=    | -2091.820108                |
| Sum of electronic and thermal Free Energies= | -2091.898585                |

**(4-methyl benzaldehyde)SnCl<sub>4</sub>(Indole) TS**

Cartesian Coordinates (Angstroms):

|    |    |   |           |           |           |
|----|----|---|-----------|-----------|-----------|
| 1  | 6  | 0 | 2.280429  | 1.794650  | -1.499390 |
| 2  | 6  | 0 | 3.039705  | 2.947298  | -1.311960 |
| 3  | 6  | 0 | 2.968197  | 3.673777  | -0.114346 |
| 4  | 6  | 0 | 2.113647  | 3.200819  | 0.889849  |
| 5  | 6  | 0 | 1.351985  | 2.045144  | 0.710320  |
| 6  | 6  | 0 | 1.431744  | 1.329439  | -0.487509 |
| 7  | 1  | 0 | 2.349586  | 1.254922  | -2.441934 |
| 8  | 1  | 0 | 3.692622  | 3.293318  | -2.110066 |
| 9  | 1  | 0 | 2.033525  | 3.749560  | 1.825431  |
| 10 | 1  | 0 | 0.681871  | 1.699397  | 1.489726  |
| 11 | 6  | 0 | 0.634525  | 0.064644  | -0.702386 |
| 12 | 8  | 0 | -0.357337 | -0.173741 | 0.338512  |
| 13 | 1  | 0 | 0.163551  | 0.077756  | -1.691629 |
| 14 | 1  | 0 | 0.450850  | -1.335547 | 0.365805  |
| 15 | 6  | 0 | 1.413923  | -1.259136 | -0.507897 |
| 16 | 6  | 0 | 2.743233  | -1.506019 | 0.095172  |
| 17 | 6  | 0 | 3.120862  | -2.814804 | -0.272115 |
| 18 | 1  | 0 | 2.098713  | -4.261706 | -1.488749 |
| 19 | 17 | 0 | -2.364475 | -0.604909 | 2.447351  |
| 20 | 17 | 0 | -2.144627 | 2.131784  | -0.717960 |
| 21 | 17 | 0 | -2.250162 | -1.803891 | -1.494234 |
| 22 | 6  | 0 | 3.760350  | 4.946834  | 0.070443  |
| 23 | 1  | 0 | 4.718504  | 4.905617  | -0.459126 |
| 24 | 1  | 0 | 3.210675  | 5.813457  | -0.320332 |
| 25 | 1  | 0 | 3.964429  | 5.142365  | 1.128385  |
| 26 | 50 | 0 | -2.422929 | -0.051265 | 0.150243  |
| 27 | 17 | 0 | -4.805189 | -0.011911 | 0.035595  |
| 28 | 6  | 0 | 4.292830  | -3.430480 | 0.162914  |
| 29 | 6  | 0 | 3.592653  | -0.772467 | 0.931574  |
| 30 | 6  | 0 | 4.775867  | -1.368446 | 1.363911  |
| 31 | 6  | 0 | 5.122084  | -2.679138 | 0.990888  |
| 32 | 1  | 0 | 3.337149  | 0.236245  | 1.233152  |
| 33 | 6  | 0 | 1.150473  | -2.419899 | -1.296361 |
| 34 | 7  | 0 | 2.117828  | -3.319672 | -1.117685 |
| 35 | 1  | 0 | 0.274808  | -2.621342 | -1.899774 |



|    |   |   |          |           |           |
|----|---|---|----------|-----------|-----------|
| 36 | 1 | 0 | 6.049091 | -3.112989 | 1.353092  |
| 37 | 1 | 0 | 5.446903 | -0.806944 | 2.007027  |
| 38 | 1 | 0 | 4.548724 | -4.444771 | -0.128921 |

**Frequency Data:****NImag:** 1 (-1314.8)

Temperature 298.150 Kelvin. Pressure 1.00000 Atm.

1 imaginary frequencies ignored.

|                                              |                             |
|----------------------------------------------|-----------------------------|
| Zero-point correction=                       | 0.273013 (Hartree/Particle) |
| Thermal correction to Energy=                | 0.297071                    |
| Thermal correction to Enthalpy=              | 0.298015                    |
| Thermal correction to Gibbs Free Energy=     | 0.214006                    |
| Sum of electronic and zero-point Energies=   | -2592.692350                |
| Sum of electronic and thermal Energies=      | -2592.668293                |
| Sum of electronic and thermal Enthalpies=    | -2592.667348                |
| Sum of electronic and thermal Free Energies= | -2592.751357                |

**(4-methyl benzaldehyde)SnCl<sub>4</sub>(Furan) TS**

Cartesian Coordinates (Angstroms):

|    |    |   |           |           |           |
|----|----|---|-----------|-----------|-----------|
| 1  | 6  | 0 | -3.209217 | -0.289632 | -1.255777 |
| 2  | 6  | 0 | -4.339320 | -1.092360 | -1.123587 |
| 3  | 6  | 0 | -4.539535 | -1.876640 | 0.022408  |
| 4  | 6  | 0 | -3.570647 | -1.824678 | 1.033129  |
| 5  | 6  | 0 | -2.437697 | -1.020241 | 0.911237  |
| 6  | 6  | 0 | -2.249321 | -0.244254 | -0.237273 |
| 7  | 1  | 0 | -3.069282 | 0.297501  | -2.161257 |
| 8  | 1  | 0 | -5.072274 | -1.121185 | -1.926460 |
| 9  | 1  | 0 | -3.698778 | -2.430865 | 1.926880  |
| 10 | 1  | 0 | -1.681767 | -1.009851 | 1.689746  |
| 11 | 6  | 0 | -1.052482 | 0.661934  | -0.372911 |
| 12 | 8  | 0 | 0.020952  | 0.331287  | 0.543821  |
| 13 | 1  | 0 | -0.710101 | 0.714149  | -1.412514 |
| 14 | 1  | 0 | -0.224640 | 1.766547  | 0.760924  |
| 15 | 6  | 0 | -1.254343 | 2.114257  | 0.119047  |
| 16 | 6  | 0 | -2.148280 | 2.659521  | 1.083213  |
| 17 | 6  | 0 | -2.287106 | 4.020496  | 0.818228  |
| 18 | 1  | 0 | -2.575442 | 2.094150  | 1.901148  |
| 19 | 6  | 0 | -1.550527 | 4.250384  | -0.336632 |
| 20 | 1  | 0 | -2.840264 | 4.757434  | 1.382567  |
| 21 | 1  | 0 | -1.354249 | 5.157986  | -0.892989 |
| 22 | 8  | 0 | -0.969927 | 3.154074  | -0.788779 |
| 23 | 17 | 0 | 2.374884  | 1.811211  | -0.706928 |
| 24 | 17 | 0 | 2.025063  | -0.877760 | 2.344750  |
| 25 | 17 | 0 | 0.810246  | -1.800929 | -1.549014 |
| 26 | 6  | 0 | -5.744125 | -2.779933 | 0.143372  |
| 27 | 1  | 0 | -6.611481 | -2.367019 | -0.382807 |
| 28 | 1  | 0 | -5.540020 | -3.767386 | -0.291475 |
| 29 | 1  | 0 | -6.023750 | -2.938151 | 1.190214  |
| 30 | 50 | 0 | 1.905994  | -0.411448 | 0.032630  |
| 31 | 17 | 0 | 4.083321  | -1.246457 | -0.458369 |

**Frequency Data:**

**NImag:** 1 (-1140.6)

Temperature 298.150 Kelvin. Pressure 1.00000 Atm.

1 imaginary frequencies ignored.

|                                              |                             |
|----------------------------------------------|-----------------------------|
| Zero-point correction=                       | 0.212616 (Hartree/Particle) |
| Thermal correction to Energy=                | 0.234102                    |
| Thermal correction to Enthalpy=              | 0.235047                    |
| Thermal correction to Gibbs Free Energy=     | 0.156142                    |
| Sum of electronic and zero-point Energies=   | -2458.946313                |
| Sum of electronic and thermal Energies=      | -2458.924827                |
| Sum of electronic and thermal Enthalpies=    | -2458.923882                |
| Sum of electronic and thermal Free Energies= | -2459.002787                |

### (4-methyl benzaldehyde)SnCl<sub>4</sub>(Thiophene) TS

Cartesian Coordinates (Angstroms):

|    |    |   |           |           |           |
|----|----|---|-----------|-----------|-----------|
| 1  | 6  | 0 | -3.129740 | -0.545732 | -1.277148 |
| 2  | 6  | 0 | -4.234988 | -1.384679 | -1.160754 |
| 3  | 6  | 0 | -4.430566 | -2.168742 | -0.013793 |
| 4  | 6  | 0 | -3.482345 | -2.079170 | 1.013424  |
| 5  | 6  | 0 | -2.373565 | -1.239048 | 0.906125  |
| 6  | 6  | 0 | -2.189501 | -0.462746 | -0.242679 |
| 7  | 1  | 0 | -2.994950 | 0.042866  | -2.182511 |
| 8  | 1  | 0 | -4.952190 | -1.441056 | -1.976350 |
| 9  | 1  | 0 | -3.606119 | -2.684558 | 1.908321  |
| 10 | 1  | 0 | -1.631166 | -1.201452 | 1.696451  |
| 11 | 6  | 0 | -1.021038 | 0.484664  | -0.366285 |
| 12 | 8  | 0 | 0.050796  | 0.199178  | 0.567050  |
| 13 | 1  | 0 | -0.662768 | 0.522146  | -1.400488 |
| 14 | 1  | 0 | -0.341530 | 1.584135  | 0.880558  |
| 15 | 6  | 0 | -1.305077 | 1.929030  | 0.141124  |
| 16 | 6  | 0 | -2.361234 | 2.319391  | 1.020138  |
| 17 | 6  | 0 | -2.592433 | 3.690386  | 1.055386  |
| 18 | 1  | 0 | -2.886905 | 1.585577  | 1.621530  |
| 19 | 6  | 0 | -1.800844 | 4.374755  | 0.134734  |
| 20 | 1  | 0 | -3.297166 | 4.180794  | 1.716472  |
| 21 | 1  | 0 | -1.768474 | 5.449760  | -0.003953 |
| 22 | 17 | 0 | 2.312265  | -0.277593 | 2.385464  |
| 23 | 17 | 0 | 0.913372  | -2.360216 | -0.941793 |
| 24 | 17 | 0 | 2.083986  | 1.453109  | -1.354459 |
| 25 | 6  | 0 | -5.607690 | -3.109601 | 0.090636  |
| 26 | 1  | 0 | -5.889516 | -3.285809 | 1.133962  |
| 27 | 1  | 0 | -6.483724 | -2.718277 | -0.437843 |
| 28 | 1  | 0 | -5.370937 | -4.086225 | -0.351996 |
| 29 | 50 | 0 | 1.950084  | -0.485099 | 0.059189  |
| 30 | 17 | 0 | 4.178058  | -1.177885 | -0.424624 |
| 31 | 16 | 0 | -0.758849 | 3.376660  | -0.762714 |

**Frequency Data:**

**NImag:** 1 (-1117.1)

Temperature 298.150 Kelvin. Pressure 1.00000 Atm.

1 imaginary frequencies ignored.

|                                              |                             |
|----------------------------------------------|-----------------------------|
| Zero-point correction=                       | 0.209289 (Hartree/Particle) |
| Thermal correction to Energy=                | 0.231181                    |
| Thermal correction to Enthalpy=              | 0.232125                    |
| Thermal correction to Gibbs Free Energy=     | 0.152856                    |
| Sum of electronic and zero-point Energies=   | -2781.929655                |
| Sum of electronic and thermal Energies=      | -2781.907763                |
| Sum of electronic and thermal Enthalpies=    | -2781.906819                |
| Sum of electronic and thermal Free Energies= | -2781.986088                |

### **(4-methyl benzaldehyde)SnCl<sub>4</sub>(toluene) TS**

Cartesian Coordinates (Angstroms):

|    |    |   |           |           |           |
|----|----|---|-----------|-----------|-----------|
| 1  | 6  | 0 | 3.029043  | -1.238284 | 1.252166  |
| 2  | 6  | 0 | 4.092670  | -2.109981 | 1.036956  |
| 3  | 6  | 0 | 4.261559  | -2.755644 | -0.197817 |
| 4  | 6  | 0 | 3.330266  | -2.492340 | -1.209792 |
| 5  | 6  | 0 | 2.262565  | -1.617311 | -1.002775 |
| 6  | 6  | 0 | 2.102866  | -0.980379 | 0.232366  |
| 7  | 1  | 0 | 2.911182  | -0.763894 | 2.224243  |
| 8  | 1  | 0 | 4.796649  | -2.303855 | 1.842990  |
| 9  | 1  | 0 | 3.433966  | -2.986412 | -2.172965 |
| 10 | 1  | 0 | 1.534423  | -1.444250 | -1.788327 |
| 11 | 6  | 0 | 0.976472  | -0.009029 | 0.474717  |
| 12 | 8  | 0 | -0.102874 | -0.158634 | -0.481704 |
| 13 | 6  | 0 | 5.393145  | -3.733101 | -0.411652 |
| 14 | 1  | 0 | 5.140725  | -4.721774 | -0.006209 |
| 15 | 1  | 0 | 6.310125  | -3.403398 | 0.089297  |
| 16 | 1  | 0 | 5.614556  | -3.863717 | -1.475783 |
| 17 | 1  | 0 | 0.618382  | -0.106349 | 1.504060  |
| 18 | 6  | 0 | 1.304959  | 1.491064  | 0.168114  |
| 19 | 6  | 0 | 0.598596  | 2.522288  | 0.890575  |
| 20 | 6  | 0 | 2.467393  | 1.892598  | -0.580524 |
| 21 | 6  | 0 | 0.948718  | 3.849914  | 0.749903  |
| 22 | 1  | 0 | -0.268985 | 2.242195  | 1.483898  |
| 23 | 6  | 0 | 2.788441  | 3.226425  | -0.718599 |
| 24 | 1  | 0 | 3.061673  | 1.124670  | -1.065884 |
| 25 | 6  | 0 | 2.041472  | 4.226132  | -0.056730 |
| 26 | 1  | 0 | 0.378245  | 4.614776  | 1.268692  |
| 27 | 1  | 0 | 3.642097  | 3.517154  | -1.324363 |
| 28 | 1  | 0 | 0.445254  | 1.295105  | -0.704076 |
| 29 | 50 | 0 | -2.046793 | -0.485535 | -0.056231 |
| 30 | 17 | 0 | -2.374415 | 1.086684  | -1.876686 |
| 31 | 17 | 0 | -1.310476 | -2.037148 | 1.659162  |
| 32 | 17 | 0 | -2.843117 | 1.068608  | 1.571101  |
| 33 | 17 | 0 | -3.460569 | -2.089606 | -1.041554 |
| 34 | 6  | 0 | 2.391243  | 5.676222  | -0.232951 |
| 35 | 1  | 0 | 3.457631  | 5.812787  | -0.435943 |
| 36 | 1  | 0 | 1.839534  | 6.089527  | -1.088720 |
| 37 | 1  | 0 | 2.116522  | 6.266658  | 0.646125  |

**Frequency Data:**  
**NImag: 1 (-774.8)**

Temperature 298.150 Kelvin. Pressure 1.00000 Atm.

1 imaginary frequencies ignored.

|                                              |                             |
|----------------------------------------------|-----------------------------|
| Zero-point correction=                       | 0.270157 (Hartree/Particle) |
| Thermal correction to Energy=                | 0.294354                    |
| Thermal correction to Enthalpy=              | 0.295298                    |
| Thermal correction to Gibbs Free Energy=     | 0.210087                    |
| Sum of electronic and zero-point Energies=   | -2500.421652                |
| Sum of electronic and thermal Energies=      | -2500.397456                |
| Sum of electronic and thermal Enthalpies=    | -2500.396512                |
| Sum of electronic and thermal Free Energies= | -2500.481722                |

### **(4-methyl benzaldehyde)SnCl<sub>4</sub>(benzene) TS**

Cartesian Coordinates (Angstroms):

|    |    |   |           |           |           |
|----|----|---|-----------|-----------|-----------|
| 1  | 6  | 0 | 3.251221  | -0.470831 | 1.245691  |
| 2  | 6  | 0 | 4.437252  | -1.170210 | 1.040506  |
| 3  | 6  | 0 | 4.690243  | -1.825665 | -0.174511 |
| 4  | 6  | 0 | 3.715947  | -1.749813 | -1.177898 |
| 5  | 6  | 0 | 2.526012  | -1.047514 | -0.981479 |
| 6  | 6  | 0 | 2.282992  | -0.399698 | 0.234919  |
| 7  | 1  | 0 | 3.071807  | 0.014165  | 2.203043  |
| 8  | 1  | 0 | 5.173732  | -1.220725 | 1.839070  |
| 9  | 1  | 0 | 3.884869  | -2.255564 | -2.125653 |
| 10 | 1  | 0 | 1.770338  | -1.018396 | -1.759554 |
| 11 | 6  | 0 | 1.019565  | 0.389728  | 0.463748  |
| 12 | 8  | 0 | -0.026611 | 0.043439  | -0.467373 |
| 13 | 6  | 0 | 5.958687  | -2.620365 | -0.376579 |
| 14 | 1  | 0 | 5.842514  | -3.646827 | -0.004321 |
| 15 | 1  | 0 | 6.802569  | -2.174709 | 0.161128  |
| 16 | 1  | 0 | 6.226113  | -2.687295 | -1.436217 |
| 17 | 1  | 0 | 0.694053  | 0.273845  | 1.501947  |
| 18 | 6  | 0 | 1.119964  | 1.916748  | 0.111075  |
| 19 | 6  | 0 | 0.221209  | 2.836753  | 0.771164  |
| 20 | 6  | 0 | 2.233561  | 2.472900  | -0.615080 |
| 21 | 6  | 0 | 0.361103  | 4.203351  | 0.600532  |
| 22 | 1  | 0 | -0.619517 | 2.430167  | 1.329257  |
| 23 | 6  | 0 | 2.344848  | 3.839504  | -0.788596 |
| 24 | 1  | 0 | 2.955757  | 1.791701  | -1.053991 |
| 25 | 6  | 0 | 1.418118  | 4.698964  | -0.174644 |
| 26 | 1  | 0 | -0.342959 | 4.885135  | 1.066344  |
| 27 | 1  | 0 | 3.158661  | 4.251954  | -1.376564 |
| 28 | 1  | 0 | 0.333297  | 1.589810  | -0.769037 |
| 29 | 50 | 0 | -1.891518 | -0.589133 | -0.047044 |
| 30 | 17 | 0 | -2.417702 | 0.666178  | -2.051114 |
| 31 | 17 | 0 | -0.968342 | -1.777236 | 1.863717  |
| 32 | 17 | 0 | -3.014246 | 0.973081  | 1.368811  |

|    |    |   |           |           |           |
|----|----|---|-----------|-----------|-----------|
| 33 | 17 | 0 | -2.962650 | -2.529077 | -0.843274 |
| 34 | 1  | 0 | 1.523182  | 5.772692  | -0.305741 |

**Frequency Data:****Nlmag:** 1 (-630.5)

Temperature 298.150 Kelvin. Pressure 1.00000 Atm.

1 imaginary frequencies ignored.

|                                              |                             |
|----------------------------------------------|-----------------------------|
| Zero-point correction=                       | 0.242806 (Hartree/Particle) |
| Thermal correction to Energy=                | 0.265133                    |
| Thermal correction to Enthalpy=              | 0.266077                    |
| Thermal correction to Gibbs Free Energy=     | 0.185746                    |
| Sum of electronic and zero-point Energies=   | -2461.126411                |
| Sum of electronic and thermal Energies=      | -2461.104084                |
| Sum of electronic and thermal Enthalpies=    | -2461.103140                |
| Sum of electronic and thermal Free Energies= | -2461.183471                |

**(4-methyl benzaldehyde)SnCl<sub>4</sub>(chlorobenzene) TS**

Cartesian Coordinates (Angstroms):

|    |    |   |           |           |           |
|----|----|---|-----------|-----------|-----------|
| 1  | 6  | 0 | -2.021145 | 2.555242  | 1.254253  |
| 2  | 6  | 0 | -2.591324 | 3.806916  | 1.039708  |
| 3  | 6  | 0 | -2.457099 | 4.461888  | -0.194415 |
| 4  | 6  | 0 | -1.737318 | 3.815520  | -1.207510 |
| 5  | 6  | 0 | -1.164866 | 2.559736  | -1.001590 |
| 6  | 6  | 0 | -1.302734 | 1.916801  | 0.234198  |
| 7  | 1  | 0 | -2.124451 | 2.076703  | 2.225903  |
| 8  | 1  | 0 | -3.138070 | 4.290957  | 1.845521  |
| 9  | 1  | 0 | -1.612566 | 4.305708  | -2.170138 |
| 10 | 1  | 0 | -0.586844 | 2.084199  | -1.787204 |
| 11 | 6  | 0 | -0.716270 | 0.550615  | 0.473883  |
| 12 | 8  | 0 | 0.330286  | 0.224423  | -0.468570 |
| 13 | 6  | 0 | -3.038518 | 5.839386  | -0.407618 |
| 14 | 1  | 0 | -2.339230 | 6.616448  | -0.071646 |
| 15 | 1  | 0 | -3.968131 | 5.975217  | 0.155463  |
| 16 | 1  | 0 | -3.249225 | 6.027031  | -1.465509 |
| 17 | 1  | 0 | -0.371059 | 0.469135  | 1.508758  |
| 18 | 6  | 0 | -1.671763 | -0.654138 | 0.144384  |
| 19 | 6  | 0 | -1.481317 | -1.899051 | 0.853736  |
| 20 | 6  | 0 | -2.914104 | -0.482633 | -0.565771 |
| 21 | 6  | 0 | -2.393530 | -2.929482 | 0.747677  |
| 22 | 1  | 0 | -0.558174 | -2.045052 | 1.410781  |
| 23 | 6  | 0 | -3.815266 | -1.518737 | -0.683878 |
| 24 | 1  | 0 | -3.111820 | 0.473472  | -1.040474 |
| 25 | 6  | 0 | -3.553976 | -2.732571 | -0.019241 |
| 26 | 1  | 0 | -2.226702 | -3.877096 | 1.247404  |
| 27 | 1  | 0 | -4.729564 | -1.405274 | -1.255654 |
| 28 | 1  | 0 | -0.824906 | -0.829775 | -0.730915 |
| 29 | 50 | 0 | 2.232548  | -0.309677 | -0.056252 |
| 30 | 17 | 0 | 1.935104  | -1.665458 | -2.038667 |
| 31 | 17 | 0 | 2.161383  | 1.237806  | 1.817514  |
| 32 | 17 | 0 | 2.240816  | -2.203951 | 1.397723  |

|    |    |   |           |           |           |
|----|----|---|-----------|-----------|-----------|
| 33 | 17 | 0 | 4.229824  | 0.638025  | -0.867348 |
| 34 | 17 | 0 | -4.700866 | -4.018781 | -0.151457 |

**Frequency Data:****NImag:** 1 (-724.1)

Temperature 298.150 Kelvin. Pressure 1.00000 Atm.

1 imaginary frequencies ignored.

|                                              |                             |
|----------------------------------------------|-----------------------------|
| Zero-point correction=                       | 0.233024 (Hartree/Particle) |
| Thermal correction to Energy=                | 0.256585                    |
| Thermal correction to Enthalpy=              | 0.257529                    |
| Thermal correction to Gibbs Free Energy=     | 0.173450                    |
| Sum of electronic and zero-point Energies=   | -2920.726858                |
| Sum of electronic and thermal Energies=      | -2920.703297                |
| Sum of electronic and thermal Enthalpies=    | -2920.702352                |
| Sum of electronic and thermal Free Energies= | -2920.786432                |

**(4-methyl benzaldehyde)SnCl<sub>4</sub>(cyanobenzene) TS**

Cartesian Coordinates (Angstroms):

|    |    |   |           |           |           |
|----|----|---|-----------|-----------|-----------|
| 1  | 6  | 0 | -2.423114 | 2.160729  | 1.240886  |
| 2  | 6  | 0 | -3.172579 | 3.315375  | 1.038267  |
| 3  | 6  | 0 | -3.128873 | 4.002015  | -0.186118 |
| 4  | 6  | 0 | -2.311353 | 3.487386  | -1.200994 |
| 5  | 6  | 0 | -1.558558 | 2.328970  | -1.007031 |
| 6  | 6  | 0 | -1.608244 | 1.653204  | 0.218658  |
| 7  | 1  | 0 | -2.460464 | 1.657520  | 2.204829  |
| 8  | 1  | 0 | -3.791727 | 3.700010  | 1.845202  |
| 9  | 1  | 0 | -2.253924 | 4.005885  | -2.154994 |
| 10 | 1  | 0 | -0.908639 | 1.957672  | -1.792571 |
| 11 | 6  | 0 | -0.824873 | 0.388717  | 0.442999  |
| 12 | 8  | 0 | 0.259938  | 0.239467  | -0.486336 |
| 13 | 6  | 0 | -3.910647 | 5.278086  | -0.385656 |
| 14 | 1  | 0 | -3.349950 | 6.143338  | -0.007986 |
| 15 | 1  | 0 | -4.865824 | 5.253088  | 0.149979  |
| 16 | 1  | 0 | -4.117198 | 5.461096  | -1.445011 |
| 17 | 1  | 0 | -0.488051 | 0.340351  | 1.483430  |
| 18 | 6  | 0 | -1.613330 | -0.940655 | 0.099491  |
| 19 | 6  | 0 | -1.223187 | -2.160834 | 0.772790  |
| 20 | 6  | 0 | -2.897235 | -0.927136 | -0.559632 |
| 21 | 6  | 0 | -1.997864 | -3.301860 | 0.687120  |
| 22 | 1  | 0 | -0.261821 | -2.189610 | 1.282071  |
| 23 | 6  | 0 | -3.654701 | -2.074446 | -0.660658 |
| 24 | 1  | 0 | -3.239520 | 0.001337  | -1.005760 |
| 25 | 6  | 0 | -3.212781 | -3.259639 | -0.027217 |
| 26 | 1  | 0 | -1.683400 | -4.222958 | 1.165472  |
| 27 | 1  | 0 | -4.599355 | -2.074686 | -1.193580 |
| 28 | 1  | 0 | -0.806053 | -0.994755 | -0.796523 |
| 29 | 50 | 0 | 2.202607  | -0.058104 | -0.053914 |
| 30 | 17 | 0 | 2.111365  | -1.422276 | -2.051080 |
| 31 | 17 | 0 | 1.904454  | 1.425118  | 1.853012  |
| 32 | 17 | 0 | 2.446780  | -1.959376 | 1.374964  |

|    |    |   |           |           |           |
|----|----|---|-----------|-----------|-----------|
| 33 | 17 | 0 | 4.053608  | 1.169388  | -0.829047 |
| 34 | 6  | 0 | -4.022422 | -4.438225 | -0.110531 |
| 35 | 7  | 0 | -4.685837 | -5.391067 | -0.176547 |

**Frequency Data:****NImag:** 1 (-488.3)

Temperature 298.150 Kelvin. Pressure 1.00000 Atm.

1 imaginary frequencies ignored.

|                                              |                             |
|----------------------------------------------|-----------------------------|
| Zero-point correction=                       | 0.241097 (Hartree/Particle) |
| Thermal correction to Energy=                | 0.265258                    |
| Thermal correction to Enthalpy=              | 0.266202                    |
| Thermal correction to Gibbs Free Energy=     | 0.181630                    |
| Sum of electronic and zero-point Energies=   | -2553.356619                |
| Sum of electronic and thermal Energies=      | -2553.332459                |
| Sum of electronic and thermal Enthalpies=    | -2553.331515                |
| Sum of electronic and thermal Free Energies= | -2553.416087                |

**AlCl<sub>3</sub>**

Cartesian Coordinates (Angstroms):

|   |    |   |           |           |          |
|---|----|---|-----------|-----------|----------|
| 1 | 17 | 0 | 0.000000  | 2.127641  | 0.000000 |
| 2 | 17 | 0 | 1.842591  | -1.063820 | 0.000000 |
| 3 | 17 | 0 | -1.842591 | -1.063820 | 0.000000 |
| 4 | 13 | 0 | 0.000000  | 0.000000  | 0.000000 |

**Frequency Data:**

Temperature 298.150 Kelvin. Pressure 1.00000 Atm.

|                                              |                             |
|----------------------------------------------|-----------------------------|
| Zero-point correction=                       | 0.004467 (Hartree/Particle) |
| Thermal correction to Energy=                | 0.009912                    |
| Thermal correction to Enthalpy=              | 0.010856                    |
| Thermal correction to Gibbs Free Energy=     | -0.025048                   |
| Sum of electronic and zero-point Energies=   | -1382.741140                |
| Sum of electronic and thermal Energies=      | -1382.735695                |
| Sum of electronic and thermal Enthalpies=    | -1382.734751                |
| Sum of electronic and thermal Free Energies= | -1382.770655                |

**InCl<sub>3</sub>**

Cartesian Coordinates (Angstroms):

|   |    |   |           |           |          |
|---|----|---|-----------|-----------|----------|
| 1 | 17 | 0 | 0.000000  | 2.288969  | 0.000000 |
| 2 | 17 | 0 | 1.982305  | -1.144484 | 0.000000 |
| 3 | 17 | 0 | -1.982305 | -1.144484 | 0.000000 |
| 4 | 49 | 0 | 0.000000  | 0.000000  | 0.000000 |

**Frequency Data:**

Temperature 298.150 Kelvin. Pressure 1.00000 Atm.

|                                            |                             |
|--------------------------------------------|-----------------------------|
| Zero-point correction=                     | 0.003111 (Hartree/Particle) |
| Thermal correction to Energy=              | 0.009214                    |
| Thermal correction to Enthalpy=            | 0.010158                    |
| Thermal correction to Gibbs Free Energy=   | -0.028470                   |
| Sum of electronic and zero-point Energies= | -1382.609897                |
| Sum of electronic and thermal Energies=    | -1382.603794                |

Sum of electronic and thermal Enthalpies= -1382.602849  
 Sum of electronic and thermal Free Energies= -1382.641478

### SnCl<sub>4</sub>

Cartesian Coordinates (Angstroms):

|   |    |   |           |           |           |
|---|----|---|-----------|-----------|-----------|
| 1 | 50 | 0 | 0.000000  | 0.000000  | 0.000167  |
| 2 | 17 | 0 | 0.000000  | 2.177913  | -0.770370 |
| 3 | 17 | 0 | 1.886128  | -1.088956 | -0.770370 |
| 4 | 17 | 0 | -1.886128 | -1.088956 | -0.770370 |
| 5 | 17 | 0 | 0.000000  | 0.000000  | 2.310618  |

#### **Frequency Data:**

Temperature 298.150 Kelvin. Pressure 1.00000 Atm.  
 Zero-point correction= 0.004654 (Hartree/Particle)  
 Thermal correction to Energy= 0.012392  
 Thermal correction to Enthalpy= 0.013336  
 Thermal correction to Gibbs Free Energy= -0.029815  
 Sum of electronic and zero-point Energies= -1844.301002  
 Sum of electronic and thermal Energies= -1844.293263  
 Sum of electronic and thermal Enthalpies= -1844.292319  
 Sum of electronic and thermal Free Energies= -1844.335471

### ZnCl<sub>2</sub>

Cartesian Coordinates (Angstroms):

|   |    |   |          |          |           |
|---|----|---|----------|----------|-----------|
| 1 | 17 | 0 | 0.000000 | 0.000000 | 2.158032  |
| 2 | 17 | 0 | 0.000000 | 0.000000 | -2.158032 |
| 3 | 30 | 0 | 0.000000 | 0.000000 | 0.000000  |

#### **Frequency Data:**

Temperature 298.150 Kelvin. Pressure 1.00000 Atm.  
 Zero-point correction= 0.002138 (Hartree/Particle)  
 Thermal correction to Energy= 0.006700  
 Thermal correction to Enthalpy= 0.007644  
 Thermal correction to Gibbs Free Energy= -0.024469  
 Sum of electronic and zero-point Energies= -986.073215  
 Sum of electronic and thermal Energies= -986.068653  
 Sum of electronic and thermal Enthalpies= -986.067709  
 Sum of electronic and thermal Free Energies= -986.099823

### BF<sub>3</sub>

Cartesian Coordinates (Angstroms):

|   |   |   |           |           |           |
|---|---|---|-----------|-----------|-----------|
| 1 | 5 | 0 | 0.000000  | 0.000000  | 0.000242  |
| 2 | 9 | 0 | 0.000000  | 1.333901  | -0.000045 |
| 3 | 9 | 0 | 1.155192  | -0.666950 | -0.000045 |
| 4 | 9 | 0 | -1.155192 | -0.666950 | -0.000045 |

#### **Frequency Data:**

Temperature 298.150 Kelvin. Pressure 1.00000 Atm.



|                                              |                             |
|----------------------------------------------|-----------------------------|
| Zero-point correction=                       | 0.012053 (Hartree/Particle) |
| Thermal correction to Energy=                | 0.015665                    |
| Thermal correction to Enthalpy=              | 0.016609                    |
| Thermal correction to Gibbs Free Energy=     | -0.013174                   |
| Sum of electronic and zero-point Energies=   | -324.499402                 |
| Sum of electronic and thermal Energies=      | -324.495791                 |
| Sum of electronic and thermal Enthalpies=    | -324.494846                 |
| Sum of electronic and thermal Free Energies= | -324.524629                 |

**TiCl<sub>4</sub>**

Cartesian Coordinates (Angstroms):

|   |    |   |           |           |           |
|---|----|---|-----------|-----------|-----------|
| 1 | 17 | 0 | 0.000000  | 2.039971  | 0.721138  |
| 2 | 17 | 0 | 0.000000  | 0.000000  | -2.163426 |
| 3 | 17 | 0 | 1.766667  | -1.019986 | 0.721138  |
| 4 | 17 | 0 | -1.766667 | -1.019986 | 0.721138  |
| 5 | 22 | 0 | 0.000000  | 0.000000  | 0.000008  |

**Frequency Data:**

|                                              |                             |          |              |
|----------------------------------------------|-----------------------------|----------|--------------|
| Temperature                                  | 298.150 Kelvin.             | Pressure | 1.00000 Atm. |
| Zero-point correction=                       | 0.005906 (Hartree/Particle) |          |              |
| Thermal correction to Energy=                | 0.013085                    |          |              |
| Thermal correction to Enthalpy=              | 0.014029                    |          |              |
| Thermal correction to Gibbs Free Energy=     | -0.027173                   |          |              |
| Sum of electronic and zero-point Energies=   | -1899.106682                |          |              |
| Sum of electronic and thermal Energies=      | -1899.099504                |          |              |
| Sum of electronic and thermal Enthalpies=    | -1899.098559                |          |              |
| Sum of electronic and thermal Free Energies= | -1899.139761                |          |              |

**SiCl<sub>4</sub>**

Cartesian Coordinates (Angstroms):

|   |    |   |           |           |           |
|---|----|---|-----------|-----------|-----------|
| 1 | 17 | 0 | 0.000000  | 1.970156  | -0.696613 |
| 2 | 17 | 0 | 0.000000  | 0.000000  | 2.089716  |
| 3 | 17 | 0 | -1.706205 | -0.985078 | -0.696613 |
| 4 | 17 | 0 | 1.706205  | -0.985078 | -0.696613 |
| 5 | 14 | 0 | 0.000000  | 0.000000  | 0.000149  |

**Frequency Data:**

|                                              |                             |          |              |
|----------------------------------------------|-----------------------------|----------|--------------|
| Temperature                                  | 298.150 Kelvin.             | Pressure | 1.00000 Atm. |
| Zero-point correction=                       | 0.006779 (Hartree/Particle) |          |              |
| Thermal correction to Energy=                | 0.013462                    |          |              |
| Thermal correction to Enthalpy=              | 0.014406                    |          |              |
| Thermal correction to Gibbs Free Energy=     | -0.025056                   |          |              |
| Sum of electronic and zero-point Energies=   | -1844.775988                |          |              |
| Sum of electronic and thermal Energies=      | -1844.769305                |          |              |
| Sum of electronic and thermal Enthalpies=    | -1844.768361                |          |              |
| Sum of electronic and thermal Free Energies= | -1844.807823                |          |              |

**AlCl<sub>3</sub>(OH)**

Cartesian Coordinates (Angstroms):

|   |    |   |           |           |           |
|---|----|---|-----------|-----------|-----------|
| 1 | 8  | 0 | -0.776750 | 1.931430  | 0.000000  |
| 2 | 17 | 0 | 2.105584  | 0.448613  | 0.000000  |
| 3 | 17 | 0 | -0.776750 | -0.855865 | 1.795413  |
| 4 | 17 | 0 | -0.776750 | -0.855865 | -1.795413 |
| 5 | 13 | 0 | -0.109961 | 0.311156  | 0.000000  |
| 6 | 1  | 0 | -1.741945 | 1.976531  | 0.000000  |

### Frequency Data:

Temperature 298.150 Kelvin. Pressure 1.00000 Atm.

1 imaginary frequencies ignored.

|                                              |                             |
|----------------------------------------------|-----------------------------|
| Zero-point correction=                       | 0.017157 (Hartree/Particle) |
| Thermal correction to Energy=                | 0.024047                    |
| Thermal correction to Enthalpy=              | 0.024992                    |
| Thermal correction to Gibbs Free Energy=     | -0.015595                   |
| Sum of electronic and zero-point Energies=   | -1458.712007                |
| Sum of electronic and thermal Energies=      | -1458.705116                |
| Sum of electronic and thermal Enthalpies=    | -1458.704172                |
| Sum of electronic and thermal Free Energies= | -1458.744758                |

### InCl<sub>3</sub>(OH)

Cartesian Coordinates (Angstroms):

|   |    |   |           |           |           |
|---|----|---|-----------|-----------|-----------|
| 1 | 8  | 0 | -0.803865 | 2.017328  | 0.000000  |
| 2 | 17 | 0 | 2.301931  | 0.339734  | 0.000000  |
| 3 | 17 | 0 | -0.803865 | -1.024283 | 1.920446  |
| 4 | 17 | 0 | -0.803865 | -1.024283 | -1.920446 |
| 5 | 1  | 0 | -1.771361 | 2.015300  | 0.000000  |
| 6 | 49 | 0 | -0.073452 | 0.222372  | 0.000000  |

### Frequency Data:

Temperature 298.150 Kelvin. Pressure 1.00000 Atm.

1 imaginary frequencies ignored.

|                                              |                             |
|----------------------------------------------|-----------------------------|
| Zero-point correction=                       | 0.015215 (Hartree/Particle) |
| Thermal correction to Energy=                | 0.023001                    |
| Thermal correction to Enthalpy=              | 0.023945                    |
| Thermal correction to Gibbs Free Energy=     | -0.019832                   |
| Sum of electronic and zero-point Energies=   | -1458.564670                |
| Sum of electronic and thermal Energies=      | -1458.556884                |
| Sum of electronic and thermal Enthalpies=    | -1458.555939                |
| Sum of electronic and thermal Free Energies= | -1458.599717                |

### SnCl<sub>4</sub>(OH)

Cartesian Coordinates (Angstroms):

|   |    |   |           |           |           |
|---|----|---|-----------|-----------|-----------|
| 1 | 8  | 0 | 0.030667  | -0.005206 | 1.903231  |
| 2 | 17 | 0 | -2.340533 | 0.000005  | 0.388179  |
| 3 | 17 | 0 | -0.021605 | -1.802480 | -0.956380 |

|   |    |   |           |           |           |
|---|----|---|-----------|-----------|-----------|
| 4 | 17 | 0 | -0.022513 | 1.804762  | -0.952259 |
| 5 | 17 | 0 | 2.400484  | 0.000876  | 0.307153  |
| 6 | 14 | 0 | -0.107077 | -0.000417 | 0.234817  |
| 7 | 1  | 0 | 0.984563  | -0.006297 | 2.112919  |

**Frequency Data:**

Temperature 298.150 Kelvin. Pressure 1.00000 Atm.  
 Zero-point correction= 0.020629 (Hartree/Particle)  
 Thermal correction to Energy= 0.029246  
 Thermal correction to Enthalpy= 0.030190  
 Thermal correction to Gibbs Free Energy= -0.014480  
 Sum of electronic and zero-point Energies= -1920.696745  
 Sum of electronic and thermal Energies= -1920.688128  
 Sum of electronic and thermal Enthalpies= -1920.687184  
 Sum of electronic and thermal Free Energies= -1920.731854

**ZnCl<sub>2</sub>(OH)**

Cartesian Coordinates (Angstroms):

|   |    |   |           |           |           |
|---|----|---|-----------|-----------|-----------|
| 1 | 17 | 0 | -0.012531 | -0.889738 | 1.959578  |
| 2 | 17 | 0 | -0.012531 | -0.889738 | -1.959578 |
| 3 | 30 | 0 | -0.012531 | 0.331128  | 0.000000  |
| 4 | 8  | 0 | -0.011633 | 2.219646  | 0.000000  |
| 5 | 1  | 0 | 0.895024  | 2.560093  | 0.000000  |

**Frequency Data:**

Temperature 298.150 Kelvin. Pressure 1.00000 Atm.  
 1 imaginary frequencies ignored.  
 Zero-point correction= 0.013727 (Hartree/Particle)  
 Thermal correction to Energy= 0.019746  
 Thermal correction to Enthalpy= 0.020690  
 Thermal correction to Gibbs Free Energy= -0.018148  
 Sum of electronic and zero-point Energies= -1061.988739  
 Sum of electronic and thermal Energies= -1061.982720  
 Sum of electronic and thermal Enthalpies= -1061.981776  
 Sum of electronic and thermal Free Energies= -1062.020613

**BF<sub>3</sub>(OH)**

Cartesian Coordinates (Angstroms):

|   |   |   |           |           |           |
|---|---|---|-----------|-----------|-----------|
| 1 | 8 | 0 | -1.468556 | 0.071154  | 0.000000  |
| 2 | 1 | 0 | -1.748728 | -0.855622 | 0.000000  |
| 3 | 5 | 0 | -0.001682 | 0.026845  | 0.000000  |
| 4 | 9 | 0 | 0.500207  | 1.356232  | 0.000000  |
| 5 | 9 | 0 | 0.500207  | -0.669662 | 1.155950  |
| 6 | 9 | 0 | 0.500207  | -0.669662 | -1.155950 |

**Frequency Data:**

Temperature 298.150 Kelvin. Pressure 1.00000 Atm.  
 1 imaginary frequencies ignored.  
 Zero-point correction= 0.025128 (Hartree/Particle)

|                                              |             |
|----------------------------------------------|-------------|
| Thermal correction to Energy=                | 0.029625    |
| Thermal correction to Enthalpy=              | 0.030569    |
| Thermal correction to Gibbs Free Energy=     | -0.002568   |
| Sum of electronic and zero-point Energies=   | -400.400814 |
| Sum of electronic and thermal Energies=      | -400.396317 |
| Sum of electronic and thermal Enthalpies=    | -400.395373 |
| Sum of electronic and thermal Free Energies= | -400.428511 |

**TiCl<sub>4</sub>(OH)**

Cartesian Coordinates (Angstroms):

|   |    |   |           |           |           |
|---|----|---|-----------|-----------|-----------|
| 1 | 17 | 0 | -2.288855 | -0.000001 | -0.426200 |
| 2 | 17 | 0 | -0.171103 | -0.000007 | 2.125923  |
| 3 | 17 | 0 | 1.192083  | -1.935322 | -0.146267 |
| 4 | 17 | 0 | 1.192079  | 1.935325  | -0.146256 |
| 5 | 8  | 0 | 0.132037  | 0.000006  | -2.048504 |
| 6 | 1  | 0 | 1.018041  | 0.000008  | -2.445646 |
| 7 | 22 | 0 | -0.035719 | 0.000001  | -0.231305 |

**Frequency Data:**

Temperature 298.150 Kelvin. Pressure 1.00000 Atm.

1 imaginary frequencies ignored.

|                                              |                             |
|----------------------------------------------|-----------------------------|
| Zero-point correction=                       | 0.017728 (Hartree/Particle) |
| Thermal correction to Energy=                | 0.026483                    |
| Thermal correction to Enthalpy=              | 0.027427                    |
| Thermal correction to Gibbs Free Energy=     | -0.017942                   |
| Sum of electronic and zero-point Energies=   | -1975.034425                |
| Sum of electronic and thermal Energies=      | -1975.025670                |
| Sum of electronic and thermal Enthalpies=    | -1975.024726                |
| Sum of electronic and thermal Free Energies= | -1975.070094                |

**SiCl<sub>4</sub>(OH)**

Cartesian Coordinates (Angstroms):

|   |    |   |           |           |           |
|---|----|---|-----------|-----------|-----------|
| 1 | 8  | 0 | 0.030667  | -0.005206 | 1.903231  |
| 2 | 17 | 0 | -2.340533 | 0.000005  | 0.388179  |
| 3 | 17 | 0 | -0.021605 | -1.802480 | -0.956380 |
| 4 | 17 | 0 | -0.022513 | 1.804762  | -0.952259 |
| 5 | 17 | 0 | 2.400484  | 0.000876  | 0.307153  |
| 6 | 14 | 0 | -0.107077 | -0.000417 | 0.234817  |
| 7 | 1  | 0 | 0.984563  | -0.006297 | 2.112919  |

**Frequency Data:**

Temperature 298.150 Kelvin. Pressure 1.00000 Atm.

|                                            |                             |
|--------------------------------------------|-----------------------------|
| Zero-point correction=                     | 0.020629 (Hartree/Particle) |
| Thermal correction to Energy=              | 0.029246                    |
| Thermal correction to Enthalpy=            | 0.030190                    |
| Thermal correction to Gibbs Free Energy=   | -0.014480                   |
| Sum of electronic and zero-point Energies= | -1920.696745                |

Sum of electronic and thermal Energies= -1920.688128  
 Sum of electronic and thermal Enthalpies= -1920.687184  
 Sum of electronic and thermal Free Energies= -1920.731854

**(4-methoxyphenyl)(p-tolyl)methylum**

Cartesian Coordinates (Angstroms):

|    |   |   |           |           |           |
|----|---|---|-----------|-----------|-----------|
| 1  | 6 | 0 | 4.613912  | 0.659204  | -0.299926 |
| 2  | 6 | 0 | 4.793029  | -0.691118 | 0.023303  |
| 3  | 6 | 0 | 3.698890  | -1.487720 | 0.392348  |
| 4  | 6 | 0 | 2.421833  | -0.951467 | 0.409989  |
| 5  | 6 | 0 | 2.211255  | 0.409741  | 0.058153  |
| 6  | 6 | 0 | 3.342661  | 1.210271  | -0.260933 |
| 7  | 6 | 0 | 0.936465  | 1.052844  | 0.038989  |
| 8  | 6 | 0 | -0.366334 | 0.539601  | -0.033273 |
| 9  | 6 | 0 | -1.446683 | 1.445374  | 0.219017  |
| 10 | 6 | 0 | -2.758755 | 1.035152  | 0.218427  |
| 11 | 6 | 0 | -3.057607 | -0.317351 | -0.083183 |
| 12 | 6 | 0 | -2.008625 | -1.227000 | -0.397617 |
| 13 | 6 | 0 | -0.704751 | -0.813320 | -0.372773 |
| 14 | 1 | 0 | 5.466875  | 1.274832  | -0.566271 |
| 15 | 1 | 0 | 3.855650  | -2.521734 | 0.682345  |
| 16 | 1 | 0 | 1.594765  | -1.557583 | 0.759699  |
| 17 | 1 | 0 | 3.197551  | 2.259512  | -0.503012 |
| 18 | 1 | 0 | 0.989775  | 2.140799  | 0.082641  |
| 19 | 1 | 0 | -1.215803 | 2.482004  | 0.448228  |
| 20 | 1 | 0 | -3.549210 | 1.742256  | 0.437615  |
| 21 | 1 | 0 | -2.280624 | -2.239390 | -0.675968 |
| 22 | 1 | 0 | 0.073096  | -1.505194 | -0.671068 |
| 23 | 8 | 0 | -4.276588 | -0.826879 | -0.125425 |
| 24 | 6 | 0 | -5.431505 | -0.007082 | 0.148283  |
| 25 | 1 | 0 | -6.283678 | -0.677167 | 0.048930  |
| 26 | 1 | 0 | -5.383856 | 0.390665  | 1.166109  |
| 27 | 1 | 0 | -5.505023 | 0.803715  | -0.582218 |
| 28 | 1 | 0 | 5.790460  | -1.120458 | 0.011552  |

**Frequency Data:**

Temperature 298.150 Kelvin. Pressure 1.00000 Atm.  
 Zero-point correction= 0.233122 (Hartree/Particle)  
 Thermal correction to Energy= 0.245690  
 Thermal correction to Enthalpy= 0.246634  
 Thermal correction to Gibbs Free Energy= 0.193378  
 Sum of electronic and zero-point Energies= -616.060321  
 Sum of electronic and thermal Energies= -616.047753  
 Sum of electronic and thermal Enthalpies= -616.046809  
 Sum of electronic and thermal Free Energies= -616.100065
